# Supplementary material for: Cytoneme delivery of Sonic Hedgehog from ligand-producing cells requires Myosin 10 and a Dispatched-BOC/CDON co-receptor complex
Source: eLife. 2021 Feb 11;10:e61432. doi: 10.7554/eLife.61432 (PMC7968926; doi:10.7554/eLife.61432)
Supplement: Figure 2—source data 1. [file elife-61432-fig2-data1.xlsx]

## Sheet: GFP contact
Complete normalized basal flux cells					noisy data set												exclude, abnormal flux
Time (S)	A		Time (S)	B	C*		TIME (S)	D	E	F	G	H	I	J	K	L	M*	N	O		TIME (S)	P		TIME (S)	Q	R		TIME (S)	S	T	U	V	W		TIME (S)	X		TIME (S)	Y	Z		TIME (S)	AA	AB
0	11.2608		0	9.33938	29.7461		0	16.0161	13.5386	8.28161	56.3766	23.132	10.2311	7.44247	6.70794	21.2162	20.1935	23.9792	12.5346		0	1.9		0	19.8397	10.0955		0	9.55171	12.1855	0	8.06157	75.7772		0	19.8583		0	32.7593	21.044		0	42.0474	1.13679
1.07	8.09809		1.281	7.19204	22.614		1.069	17.0038	12.9743	9.78864	51.7562	28.4242	11.9166	6.07846	6.17654	17.9697	20.7174	26.6091	9.27733		1.674	2.29468		1.664	15.3495	24.5169		1.665	7.10989	13.6201	7.41084	12.899	63.3846		1.674	19.8585		1.677	28.3294	23.7477		1.661	7.12207	1.59395
2.145	8.47335		2.569	6.6353	27.6999		2.145	12.83	13.5535	8.39537	46.6589	20.8312	3.90868	5.30171	8.56378	18.1993	17.8231	8.10275	10.3013		3.35	3.12889		3.329	16.2988	14.8553		3.333	4.5976	10.2015	6.16329	7.04012	70.3177		3.348	15.4771		3.355	17.9554	21.8797		3.321	14.8943	5.58093
3.214	13.7247		3.857	5.35959	23.9653		3.213	16.2463	11.9158	10.2406	41.6001	18.0264	6.06602	6.67761	3.67797	20.6681	17.8099	11.4067	11.2181		5.026	2.90427		4.993	62.7998	28.8148		5	4.88721	15.4876	9.55446	6.64196	76.6498		5.022	22.5572		5.033	29.0659	24.6902		4.981	32.2757	3.36526
4.289	8.82893		5.141	2.14425	26.6112		4.289	14.9721	13.1784	7.4318	41.1901	21.8796	3.50936	7.12531	6.875	18.6137	16.4263	6.88956	6.52208		6.703	1.22173		6.658	69.0026	30.2647		6.667	0.400828	10.7496	3.32785	15.8822	65.0382		6.697	22.4435		6.711	13.6617	21.7267		6.64	4.3276	1.09746
5.357	8.3662		6.432	4.75475	27.6832		5.357	18.2639	13.3212	5.53862	30.4981	13.0796	6.9554	6.47288	5.1583	17.8489	10.0118	12.5682	12.8374		8.379	1.53209		8.321	43.0517	29.5398		8.334	2.58842	11.3995	7.22564	5.59956	60.613		8.371	29.0712		8.39	21.3291	26.3782		8.3	26.5843	14.8938
6.433	9.26093		7.724	3.09113	27.8072		6.433	17.0688	12.2707	10.5381	28.4572	27.5494	3.47965	7.06182	7.43895	18.2384	15.161	15.0273	9.13929		10.055	0		9.985	25.5738	19.6867		10.001	1.93018	13.1075	2.6824	7.72198	72.4319		10.045	12.649		10.067	18.0498	29.7403		9.961	4.28362	13.8272
7.502	7.34774		9.009	4.97934	19.3417		7.501	12.5386	12.2683	8.13397	23.1841	24.1567	9.70593	9.07989	5.5374	20.1815	12.2318	4.1721	8.6902		11.73	2.93994		11.65	14.2136	21.0138		11.668	3.11123	11.6894	6.20581	8.238	78.9628		11.719	15.0528		11.745	25.8225	25.1805		11.621	5.01843	18.358
8.578	11.785		10.296	3.37633	23.5245		8.577	14.115	11.6273	6.13551	21.4691	17.0945	5.28399	8.33428	6.79233	21.6665	11.9515	11.8662	11.8403		13.406	2.84886		13.315	16.2988	6.83427		13.335	2.94134	8.90549	4.60659	8.40117	76.3459		13.394	6.96965		13.423	13.6788	28.4165		13.282	16.1802	17.8367
9.646	7.53096		11.576	10.7991	21.3086		9.645	18.1818	11.9588	5.37362	18.0897	28.6434	7.54618	2.16552	5.69547	17.2703	12.8763	19.1026	11.7029		15.082	3.09312		14.979	8.04957	8.21178		15.002	1.96945	8.36366	4.05853	8.36104	65.9138		15.068	20.4217		15.101	17.5386	28.0794		14.942	21.93	8.99254
10.721	10.3547		12.868	6.86202	20.0713		10.721	12.718	10.9344	8.63512	17.6119	21.3814	3.39409	7.33919	6.70716	19.9904	11.1243	15.6848	8.82725		16.758	3.77009		16.644	8.48024	21.8098		16.669	0.432878	10.2079	9.29251	7.81687	51.5692		16.743	5.67706		16.78	28.6099	27.2644		16.601	42.2311	0
11.797	8.70687		14.16	5.41119	20.2225		11.797	13.2851	10.3001	7.5653	13.7394	27.5494	1.83315	5.52146	5.76142	19.1232	11.9475	10.3052	11.2052		18.434	2.71831		18.307	21.0659	28.8666		18.336	1.58044	9.81583	5.20091	2.65446	44.9739		18.416	14.4828		18.458	30.7996	30.4926		18.262	44.2307	0.752269
12.865	6.75012		15.444	8.66214	25.2425		12.865	13.1753	14.1814	7.03529	12.4463	25.4548	2.81786	8.88196	7.50189	18.1349	11.1901	6.96129	7.63556		20.11	2.92274		19.971	11.6816	29.5902		20.003	3.12217	8.41716	8.12725	7.22715	54.8551		20.091	13.1499		20.135	19.0641	32.5155		19.922	26.4006	7.25455
13.941	9.07299		16.736	5.79569	21.1724		13.941	11.8798	11.3495	8.80885	12.8385	25.2496	0	4.54457	7.84311	20.1357	13.2276	12.939	7.6735		21.785	2.74687		21.637	10.636	25.6046		21.67	3.39582	9.69637	6.59842	9.27927	42.4392		21.765	19.7027		21.813	13.1311	29.1569		21.582	22.5039	10.5414
15.009	10.8733		18.029	11.5782	19.6248		15.009	13.2478	10.1657	9.08681	6.90819	26.6568	3.48257	5.07428	10.808	13.6061	12.7104	18.1434	8.39368		23.461	0.0625926		23.301	15.0548	19.9279		23.337	2.19867	0.456362	8.10021	1.45399	65.4342		23.439	18.641		23.491	17.4968	25.1969		23.242	32.1716	1.04159
16.086	10.3953		19.308	10.8339	24.3568		16.086	14.0719	10.4608	12.6328	8.20187	22.5395	10.3277	7.8399	6.74274	11.9206	14.3841	12.8667	9.83132		25.138	1.02414		24.965	12.0405	31.4721		25.003	3.81491	9.07727	8.77682	10.0285	71.942		25.113	21.6891		25.169	20.3423	35.2801		24.903	62.101	8.81042
17.154	7.54218		20.596	11.8612	18.7119		17.153	18.0832	15.1578	8.52479	7.44724	23.5141	8.77631	6.46595	10.0706	16.7636	13.8332	17.9075	7.85423		26.814	0.59159		26.63	12.4514	30.8687		26.67	4.29606	11.8199	6.4039	7.31006	54.7767		26.789	16.5315		26.848	6.48649	36.6044		26.562	63.5905	6.44641
18.23	10.0654		21.888	7.12165	20.6591		18.229	17.3069	12.7929	6.90644	5.08185	20.6253	8.3625	11.1611	8.12487	12.971	15.774	9.46112	6.3255		28.489	0.559039		28.293	15.6903	26.4001		28.337	4.41655	8.32891	12.756	12.0617	53.3353		28.462	14.7344		28.526	27.8793	35.4898		28.223	49.8993	3.01905
19.298	11.1598		23.173	7.29428	21.5445		19.297	15.1513	13.6277	13.4299	7.33524	33.8054	13.6438	6.53615	8.33369	12.0672	12.8538	8.52475	8.33346		30.165	0.422489		29.957	20.2058	29.7112		30.005	5.33314	8.26809	7.55868	9.12177	43.4056		30.136	18.4818		30.203	19.8647	35.9437		29.883	15.078	8.5832
20.373	9.29521		24.464	4.95086	19.1193		20.373	22.4073	13.4392	7.79743	4.48134	16.8439	10.3431	9.25651	8.46695	9.77094	16.6383	21.3574	12.3427		31.84	1.7645		31.623	12.8281	16.7365		31.671	2.96815	8.11113	2.17619	5.19598	45.5525		31.811	15.338		31.881	25.2607	35.5844		31.543	29.5625	6.00681
21.441	9.51798		25.757	9.54707	25.3921		21.441	17.1885	10.9991	8.05752	7.97429	23.8365	15.0988	9.61634	11.2115	10.488	14.2844	13.3308	9.65005		33.517	1.73029		33.287	20.7445	39.0811		33.338	4.06296	11.9796	8.24031	11.7602	47.7851		33.485	18.5802		33.559	14.2344	30.6904		33.203	37.5997	8.79263
22.518	10.784		27.037	8.46084	24.0239		22.517	14.842	11.9366	7.36568	6.6295	24.3545	8.60021	7.72905	10.5209	7.71504	13.4462	15.1368	7.84149		35.193	3.30574		34.951	9.27623	24.8299		35.005	3.65607	10.6485	6.52716	11.07	42.886		35.159	13.5542		35.237	3.59906	34.0831		34.863	23.1363	5.34872
23.586	11.1223		28.324	8.16383	18.076		23.585	16.2011	12.0111	10.3963	6.95133	29.219	8.12443	8.84517	10.8664	7.67929	15.0195	17.624	11.0354		36.869	1.26543		36.616	7.37091	25.5335		36.672	4.51101	6.88317	10.859	9.09022	47.9463		36.834	23.9578		36.915	18.7614	31.1963		36.523	24.4011	8.20922
24.662	10.6349		29.604	4.21944	28.6609		24.661	14.5251	11.1481	8.88766	5.44651	14.6905	13.0389	14.0745	11.6196	11.0309	14.9851	14.4757	2.83354		38.545	2.59422		38.279	16.9601	7.2475		38.34	6.79938	10.5709	12.2981	14.7488	54.5367		38.508	20.2912		38.593	25.2695	35.9786		38.184	21.6879	5.75103
25.738	10.9778		30.893	11.9954	27.25		25.737	19.5402	10.9722	15.3241	7.24531	28.8425	14.5574	10.6301	12.1137	7.5073	14.1301	15.7373	9.76981		40.22	0.27183		39.943	16.5754	31.2309		40.007	5.9878	9.31764	10.1779	10.4851	46.5717		40.182	21.842		40.27	18.7862	35.4318		39.844	24.4595	3.99026
26.805	11.2496		32.18	7.06494	20.964		26.805	16.4675	13.8917	7.31294	6.59583	25.7228	9.80875	10.9293	12.1658	7.14495	13.8001	12.339	7.66597		41.895	1.39326		41.608	14.3749	17.9956		41.673	5.67387	7.13258	7.86476	10.5968	54.4198		41.856	15.7344		41.948	7.85615	31.348		41.504	22.1365	8.22849
27.881	10.7695		33.464	9.70388	20.7459		27.881	19.4365	12.4413	8.66832	4.3769	32.9693	2.88674	10.5806	10.1027	14.3674	13.842	17.7959	5.99402		43.572	2.97261		43.273	5.9664	24.4969		43.34	6.40196	5.76199	6.28223	8.28532	46.68		43.53	17.4276		43.626	9.88773	29.318		43.164	15.7103	9.2796
28.95	8.27701		34.756	5.48141	26.1827		28.949	14.3534	12.9079	7.40069	4.24958	19.9306	13.3182	11.1005	10.9227	12.6666	16.5092	9.50956	7.89444		45.248	2.42509		44.937	20.0909	41.0232		45.007	4.23231	3.73239	5.99049	11.319	47.2864		45.206	13.5971		45.305	17.9442	35.9091		44.824	16.159	1.8903
30.025	8.58307		36.044	12.0013	20.6761		30.025	20.5788	13.1421	10.4882	7.35723	33.9703	13.4478	9.13685	9.98107	9.47987	12.6374	12.3774	7.08727		46.924	4.8526		46.601	21.5401	23.8643		46.674	4.8847	5.50016	8.43138	10.5919	55.6861		46.88	10.1586		46.983	10.3018	39.5634		46.484	25.196	6.54263
31.093	8.81474		37.324	13.3176	23.4558		31.093	13.5179	14.6747	10.9822	4.08801	28.8811	13.5689	10.1056	11.9156	7.16658	16.648	18.4362	3.65881		48.6	6.0661		48.265	11.1997	12.6313		48.342	2.28664	5.03811	3.12322	14.8209	54.6866		48.553	15.6915		48.661	15.1903	40.9956		48.145	16.159	8.9675
32.17	10.3755		38.613	13.8353	24.9483		32.169	17.4517	13.8292	9.02629	3.4054	28.7911	12.4242	10.7223	9.87713	8.69945	12.5139	12.2697	1.3121		50.275	7.30916		49.93	10.4303	26.3994		50.008	5.30425	5.71588	7.80141	16.6051	35.3922		50.227	19.7893		50.338	19.2115	44.9178		49.805	22.7689	11.7889
33.238	10.5311		39.904	13.4069	21.8557		33.237	14.235	11.5756	6.66598	4.28198	17.3288	14.548	10.5286	13.2478	12.3184	18.1098	22.1247	7.77988		51.952	6.84723		51.594	15.0104	28.8155		51.674	6.12711	6.83514	6.14108	22.5282	42.4378		51.902	18.8153		52.016	25.4668	44.4914		51.465	12.5485	12.8698
34.313	10.9585		41.184	10.0956	22.8753		34.313	17.115	10.2104	8.71163	5.03867	31.691	11.9331	9.51323	12.0736	10.217	14.2517	12.3276	9.98803		53.628	6.92104		53.259	12.4252	23.6219		53.341	6.03036	4.46908	6.54937	32.8212	40.1708		53.576	24.4807		53.694	15.3207	43.6921		53.125	18.7909	11.4748
35.382	7.66028		42.477	11.9822	16.9547		35.381	20.3894	12.2806	11.8706	5.21053	26.0263	12.0584	9.39906	11.3945	11.6922	13.1373	15.292	5.37824		55.303	4.62749		54.923	12.3357	40.0971		55.008	5.34781	6.54499	6.17277	42.6369	41.9147		55.251	22.8192		55.373	16.9968	44.3992		54.785	21.8716	12.8593
36.458	9.33362		43.76	15.6699	17.1033		36.457	16.6945	14.7818	8.13147	5.97188	21.0067	17.3942	9.51604	11.5257	13.3198	15.1423	17.6934	0.259892		56.979	5.54004		56.587	4.10543	12.1475		56.675	10.4091	9.28869	5.98134	46.3263	36.7576		56.926	13.1663		57.051	5.7167	45.0646		56.445	25.0334	11.6925
37.525	9.42231		45.048	13.4148	16.8374		37.525	20.0768	12.8996	11.9743	9.87631	26.4711	14.0889	8.48207	13.2109	6.66048	10.4463	20.2632	4.0451		58.655	6.92264		58.251	10.7703	30.2641		58.343	11.8671	1.82404	10.9079	57.1524	40.934		58.599	24.7376		58.729	15.6404	49.6955		58.105	21.4229	12.3413
38.601	9.92214		46.336	20.4962	12.1421		38.601	14.2741	14.1541	10.708	5.81599	38.4751	9.24341	8.98573	11.7687	9.01726	14.5848	9.18366	2.51949		60.331	8.7167		59.916	14.8495	26.3994		60.01	11.7666	6.12086	10.115	54.6169	34.4708		60.273	19.2062		60.406	24.861	51.2204		59.766	20.8718	10.8785
39.67	10.3754		47.616	14.7828	9.37643		39.669	14.1239	11.4167	8.47017	8.97629	41.5864	10.4736	12.3426	15.013	12.3444	14.0318	13.72	5.69664		62.007	8.43882		61.58	8.05038	8.45426		61.676	14.4492	7.21374	13.8304	38.6499	46.4314		61.947	21.9309		62.084	21.0788	50.8558		61.426	17.6075	21.797
40.745	10.3154		48.905	13.3293	16.0721		40.745	15.5717	14.1836	10.1045	5.21255	40.7785	13.0824	9.05635	14.542	11.5639	15.0894	13.5551	10.3896		63.683	9.02489		63.245	10.6542	16.6162		63.343	17.945	13.4097	12.35	34.0467	45.7404		63.623	15.9463		63.763	25.4308	56.898		63.086	18.9747	9.607
41.822	9.5976		50.197	9.17499	8.23282		41.821	16.3188	13.0885	9.7335	4.36703	25.703	11.1324	11.72	10.6791	12.8487	13.6395	21.8825	7.13088		65.359	8.41432		64.909	2.76426	6.71208		65.01	17.484	5.99755	13.9153	24.2809	46.7871		65.297	20.1765		65.441	26.4427	54.0138		64.747	46.9227	14.3197
42.89	10.0934		51.48	7.63268	4.62584		42.889	16.6906	13.2677	13.5585	4.0005	30.5797	9.20967	7.26213	10.69	11.8502	12.5827	11.5925	2.62308		67.035	8.03246		66.573	10.6542	19.0316		66.678	18.2603	11.9051	14.563	19.5128	53.1931		66.971	24.0984		67.119	18.8446	64.419		66.406	24.5636	12.4189
43.966	8.87761		52.768	12.8986	5.3169		43.965	14.5108	13.4744	11.8132	3.91302	31.9279	5.99259	5.86539	11.0593	9.91706	13.5498	23.0085	3.89448		68.711	7.78882		68.237	5.60668	18.599		68.345	17.7013	7.45778	20.0366	15.3776	38.6971		68.644	20.0282		68.797	25.1386	60.5073		68.066	26.5631	9.20095
45.034	13.3987		54.061	12.1174	5.76693		45.033	15.9895	15.6286	11.8135	4.91903	33.669	7.65766	8.20354	11.2925	9.9167	11.3718	13.7714	2.12599		70.386	8.28663		69.902	6.39586	19.9984		70.012	16.6084	6.84279	17.3165	9.98661	48.7644		70.319	22.5796		70.473	27.3898	63.6918		69.726	17.6887	13.7796
46.11	11.2464		55.34	12.1037	9.81206		46.109	14.5322	11.5052	12.0843	4.24845	37.0108	6.4839	6.21513	10.9581	11.7797	10.4868	11.734	4.89088		72.062	9.22429		71.566	8.21166	27.8493		71.678	14.8694	8.82725	24.5757	6.97185	31.8902		71.993	21.6287		72.151	6.53635	66.713		71.387	23.4825	16.2949
47.178	12.4354		56.628	12.0379	6.40455		47.177	16.7194	15.3218	13.1549	5.35276	36.5836	13.4223	8.96979	10.8838	12.051	13.1834	6.48672	3.32479		73.738	7.80887		73.231	9.16011	22.5846		73.344	13.0809	6.90293	23.3894	8.59393	36.3375		73.668	20.5477		73.83	27.9207	72.5422		73.047	21.6667	21.4853
48.254	7.48329		57.92	13.3568	0.612445		48.253	16.8333	14.0245	8.30239	4.59674	27.9325	6.27424	7.95824	8.19281	13.3606	9.83163	17.2546	5.00654		75.414	9.2503		74.895	12.13	29.781		75.011	13.1456	1.136	20.7506	12.2559	32.4276		75.342	19.9785		75.508	23.1297	77.0422		74.708	15.4242	12.0925
49.321	9.85477		59.2	14.9697	2.50356		49.321	13.5077	12.3871	10.6844	1.52519	38.4733	6.91688	4.7282	10.7082	14.4652	9.46837	17.9171	3.45113		77.09	9.086		76.559	4.4006	25.2206		76.679	13.4999	4.44826	24.3994	2.92958	27.8914		77.017	17.1176		77.186	23.4324	77.3639		76.367	31.9895	9.12831
50.397	9.71541		60.493	7.76947	4.73759		50.397	17.4535	12.2965	3.80799	5.18523	44.5941	2.72022	9.75456	9.45449	15.5513	11.9523	18.2272	2.61209		78.766	8.61735		78.224	13.2208	25.6046		78.346	9.09497	10.8035	26.9438	2.57785	23.5306		78.69	23.7604		78.864	33.8398	76.978		78.027	35.4376	9.01759
51.466	9.74455		61.776	13.3997	9.79131		51.465	13.4098	14.6423	7.04461	6.28625	34.6844	9.66025	5.36914	7.10745	19.2104	7.09774	14.1098	4.27881		80.442	9.97965		79.888	6.86968	8.16196		80.013	9.73259	6.88424	16.619	4.36294	30.3402		80.364	19.766		80.541	28.971	82.5861		79.687	20.8718	19.214
52.542	5.8932		63.069	15.9446	15.5997		52.541	14.6996	13.1408	7.03549	1.91949	31.8801	8.98702	7.24705	11.8744	17.1092	10.0876	13.933	10.496		82.118	10.6247		81.552	9.29441	21.9301		81.679	8.32937	5.9309	22.8458	8.9095	22.007		82.04	19.8311		82.22	20.5396	84.1645		81.347	24.7473	19.4888
53.61	10.3926		64.356	7.82198	0		53.609	19.6629	12.9327	11.1196	3.2422	29.5511	3.96968	11.0622	9.58983	23.6127	9.66808	13.3469	8.16949		83.793	8.77225		83.216	21.8091	37.0279		83.346	8.51889	6.02074	29.851	2.53975	29.7814		83.714	20.8424		83.898	28.0071	80.7085		83.008	16.159	25.3363
54.685	5.61663		65.636	5.52878	2.01254		54.685	16.4028	13.2489	9.67878	3.33803	28.9164	7.16828	8.22125	11.0658	16.4254	8.11039	24.3689	7.2997		85.469	8.79013		84.881	13.8745	23.38		85.014	7.25063	0.200821	31.0431	9.19837	25.2387		85.388	11.8		85.576	25.6057	80.4379		84.669	18.6885	20.4983
55.754	11.5528		66.928	10.0197	2.52277		55.753	13.0654	16.2531	9.41292	1.97879	29.8634	4.58262	8.72988	12.1835	20.0535	10.4619	22.3342	9.70579		87.145	9.03215		86.545	11.584	16.3039		86.681	6.19923	3.81487	40.5742	5.51317	28.6522		87.062	11.5974		87.254	31.1278	79.3693		86.328	17.77	18.6484
56.83	9.25716		68.22	12.056	11.6123		56.829	15.7805	15.3277	10.8702	2.74271	29.7832	9.43761	5.00156	9.39966	12.4388	11.9558	25.857	9.61467		88.822	9.86409		88.209	16.3435	13.9596		88.348	2.51709	8.58773	48.3928	0.809184	28.297		88.736	23.6424		88.932	28.5129	75.4114		87.988	21.0343	19.434
57.905	11.1448		69.5	14.4173	10.7572		57.905	10.7771	13.0555	8.10898	5.33216	24.4935	8.99245	6.02631	10.595	15.26	15.9468	11.5078	12.5907		90.497	9.84674		89.874	12.9442	19.7566		90.015	4.31869	6.16479	60.1338	6.77649	19.9196		90.41	12.3826		90.609	26.1785	76.7242		89.648	21.7691	18.6877
58.973	10.2322		70.792	5.96593	12.1132		58.973	16.1756	14.4535	7.1359	3.64579	25.5771	10.3176	10.035	11.2073	18.1364	14.2212	11.384	7.31084		92.173	8.11863		91.538	7.12009	24.8286		91.681	5.34247	4.35248	77.7736	5.08694	27.694		92.085	19.7491		92.288	21.179	70.93		91.308	17.505	12.5938
60.05	9.63936		72.085	12.6095	5.26206		60.049	16.9542	15.2251	8.20314	6.12916	16.3191	7.01982	11.6223	10.7723	14.8567	17.0304	17.3339	7.36071		93.849	9.71331		93.202	12.5595	29.5392		93.348	2.31633	2.63964	77.6598	0	20.4289		93.759	14.1289		93.966	22.2765	69.5457		92.969	29.1138	23.5174
61.117	11.7095		73.364	9.58677	13.8679		61.117	15.4002	14.2855	7.74812	2.92454	11.9521	7.60267	9.41803	10.7522	17.3023	14.643	21.4388	12.3443		95.525	8.88578		94.867	13.9192	15.0467		95.016	3.19587	5.73262	78.6277	0.918719	19.9543		95.434	6.76897		95.644	22.3853	63.9959		94.63	22.2034	20.7689
62.194	11.1003		74.652	12.0285	11.2493		62.193	15.0897	10.8085	7.3696	2.25909	16.8035	12.8832	7.03318	10.1438	18.2301	17.5574	23.0531	9.24946		97.2	10.8326		96.531	8.77541	33.8164		96.683	4.23473	7.76591	69.5496	7.66519	18.1684		97.108	26.3608		97.322	29.6968	58.0485		96.289	3.73251	18.6722
63.262	11.8978		75.932	12.8926	12.2519		63.261	19.0441	14.2717	6.12828	5.39696	21.3687	11.3611	12.0941	11.8826	15.5215	18.4108	20.2743	6.33639		98.877	10.0287		98.195	13.4446	31.0887		98.349	4.55028	4.12599	64.9729	3.38566	20.8973		98.781	18.9948		99	19.6144	53.2218		97.949	27.7466	18.5427
64.338	11.174		77.224	17.3401	14.7227		64.337	16.8199	11.5391	13.4815	4.68409	23.0025	8.60173	6.0658	13.8135	19.124	17.9881	21.6364	9.55869		100.552	12.1245		99.86	12.3982	15.1663		100.016	4.32024	3.44559	58.6978	6.50655	12.6053		100.455	23.6451		100.678	22.4325	55.216		99.609	28.8277	18.2711
65.405	8.96502		78.516	13.1509	13.8717		65.405	18.1606	14.2184	13.7552	3.47864	22.3018	6.69717	9.17704	13.7251	14.0945	16.1589	30.1678	9.87587		102.228	12.3033		101.524	15.6633	10.99		101.682	6.96744	8.34574	53.4571	7.06536	21.89		102.131	21.3338		102.356	23.0748	48.6542		101.269	22.5852	24.678
66.482	9.75627		79.797	10.7229	13.9773		66.481	18.8653	14.0848	8.57532	7.65008	30.5627	4.49666	7.55284	10.0284	16.3883	15.3087	25.4806	5.95696		103.904	9.69154		103.188	63.3901	26.4499		103.35	10.9644	11.9331	44.8545	7.00138	22.0268		103.805	13.1346		104.034	20.7119	51.2464		102.93	12.9616	27.5973
67.55	9.80439		81.085	16.1954	15.5857		67.549	17.4975	13.9812	16.289	5.25053	27.3398	5.34225	6.86892	8.52097	16.2702	13.0146	37.5225	7.75644		105.58	12.2576		104.853	75.9226	26.6911		105.017	10.2107	0	30.9915	7.17465	20.3942		105.479	19.5578		105.711	18.3748	48.0603		104.59	2.52623	25.0139
68.626	10.2565		82.372	12.2797	15.9127		68.625	17.2206	13.0714	22.8817	4.72007	26.1118	5.50673	8.98273	8.9105	15.2023	14.1769	32.3773	11.861		107.257	10.5129		106.518	71.5103	34.7832		106.684	11.5649	10.3621	31.9975	9.47601	21.168		107.153	14.7742		107.389	14.1427	38.9388		106.25	7.83571	17.6649
69.694	9.32019		83.652	15.1458	15.6088		69.693	19.6834	14.5513	23.6572	4.94292	26.4685	11.4242	10.1084	16.8407	18.5134	12.9422	53.0012	5.64008		108.933	10.2236		108.181	50.6392	38.406		108.351	12.2089	9.29692	23.5422	7.45001	17.5749		108.827	17.4216		109.067	19.0641	43.2108		107.91	22.4015	12.6676
70.77	9.22574		84.94	8.19928	21.4413		70.769	17.682	12.0782	23.8725	6.86281	32.6621	7.23161	6.55166	12.7168	25.418	12.1626	70.0299	9.60398		110.607	9.81389		109.846	37.0595	27.7058		110.018	14.8492	5.3843	18.368	7.7621	17.265		110.502	20.4942		110.745	14.6957	31.9338		109.57	7.99824	17.2235
71.838	8.87213		86.232	12.5159	13.3116		71.837	18.2333	13.4998	33.607	5.06173	21.3131	6.78356	9.00285	8.7175	17.7719	8.32621	71.0763	3.10674		112.283	9.64961		111.51	53.0256	33.938		111.684	23.6984	5.96901	11.0308	5.81183	22.2197		112.176	18.6951		112.423	28.5017	33.3382		111.231	23.4013	18.1865
72.914	7.95151		87.517	12.6159	19.3861		72.913	17.5207	13.6733	34.1232	4.1904	32.2972	8.71949	6.9489	12.2084	17.9501	10.3343	100	10.3991		113.959	11.3082		113.174	44.1352	25.604		113.352	34.0967	11.0187	12.6345	8.21981	25.5506		113.851	19.8145		114.101	42.6911	25.6367		112.891	18.7765	11.7711
73.99	10.1025		88.809	14.7499	24.2369		73.989	18.7171	14.696	62.7935	4.89787	42.7101	12.0352	9.69836	15.5749	17.5567	9.50127	88.7188	11.4178		115.635	12.8636		114.84	39.0564	14.1485		115.019	40.7089	6.93729	6.03263	4.13086	20.0648		115.525	24.0833		115.779	28.4572	23.265		114.551	17.3425	15.0998
75.058	9.85833		90.101	17.0236	11.4227		75.057	14.88	12.4268	80.0865	5.74936	23.9538	9.77991	9.08006	12.3291	16.8424	9.85566	95.0764	7.27226		117.312	10.8797		116.504	45.3349	21.7898		116.686	50.0754	14.3599	5.94278	9.16594	20.1605		117.199	15.9079		117.457	27.3453	25.8026		116.21	20.3207	14.7674
76.134	7.10869		91.385	12.4788	25.8746		76.133	17.1484	12.1514	92.1866	4.36613	30.3859	11.4354	10.7127	8.69523	19.8921	10.3122	89.9468	6.81076		118.988	12.0179		118.167	35.3167	26.7622		118.353	50.6453	8.60733	5.9199	4.22299	18.0791		118.872	19.2644		119.135	30.166	17.1931		117.87	32.3425	18.721
77.202	9.6383		92.672	18.2544	21.6326		77.201	14.0677	11.1984	98.7347	8.45719	29.5516	13.852	9.7461	12.4418	21.5721	8.35353	82.416	9.14848		120.663	12.1372		119.832	37.2026	24.5887		120.02	53.557	15.5127	4.37198	7.62846	15.659		120.548	8.46693		120.813	32.1226	17.0623		119.531	28.0116	20.8996
78.278	9.53797		93.953	16.9386	18.5098		78.277	16.2772	14.003	100	6.69301	21.0279	11.9414	9.50754	12.5349	23.3043	9.89413	56.9133	9.01586		122.339	9.79718		121.496	16.7992	24.3462		121.685	62.7711	15.6808	9.42883	3.43985	16.883		122.222	11.8705		122.491	16.6214	16.751		121.192	13.7108	22.3994
79.346	10.1308		95.244	13.9187	20.2159		79.345	18.2695	14.9911	95.4857	7.66148	26.0886	13.5358	9.11826	13.6278	16.5734	8.74676	59.4824	3.1298		124.014	11.813		123.16	25.9331	22.2231		123.353	71.9677	8.07649	3.42993	5.58896	15.4314		123.896	14.0624		124.169	26.1561	16.6226		122.852	18.1442	25.3674
80.422	10.9302		96.537	15.237	22.8173		80.421	18.213	14.0038	94.8215	7.47881	30.5243	13.7375	5.75467	11.3103	18.4227	8.85738	60.7599	10.578		125.691	11.3485		124.825	24.6181	28.5736		125.02	79.6242	12.3977	5.64673	9.95481	14.1289		125.57	19.9368		125.847	22.6436	11.7483		124.512	28.2766	35.9944
81.49	9.93241		97.82	14.987	17.0076		81.489	20.43	12.0473	97.3356	4.51101	17.3196	15.0385	3.56605	10.0323	18.492	8.45536	56.7848	7.98196		127.367	11.8545		126.49	23.2576	19.9273		126.687	78.5256	9.43022	3.23683	3.69863	21.0357		127.245	14.4438		127.525	18.0468	14.5863		126.171	15.387	28.0517
82.565	8.18196		99.112	12.0561	24.1533		82.565	20.6693	15.6553	97.6276	0	17.0577	14.8155	9.79941	13.4505	13.9615	6.76442	37.1306	4.41956		129.043	13.0576		128.153	14.7596	28.6939		128.354	72.1136	11.819	8.56495	6.81006	23.8192		128.919	32.7196		129.203	22.3186	11.2778		127.831	24.5636	23.9708
83.634	6.68725		100.404	14.1479	28.8552		83.633	15.8471	13.9337	90.4685	1.47444	23.4109	11.6788	7.50711	14.5229	16.5314	8.24279	38.8505	7.72246		130.718	12.0787		129.817	12.8986	23.4997		130.021	66.2622	11.1677	7.86335	7.54126	16.307		130.593	19.9454		130.881	23.7966	10.911		129.491	44.3932	26.7531
84.71	10.5039		101.684	12.828	20.0891		84.709	24.1536	14.2488	91.3941	4.67473	25.7224	14.1178	5.08574	14.692	14.6481	6.53602	26.2825	10.2438		132.394	11.2931		131.482	14.8112	31.3512		131.688	64.2753	9.58123	8.62328	10.2964	20.0995		132.267	16.728		132.559	11.5441	2.09317		131.153	15.9753	24.6399
85.778	8.99142		102.977	9.94803	20.675		85.777	21.4413	15.6256	84.0226	8.14753	21.9819	13.1951	5.83271	16.7736	11.782	6.47456	21.0759	11.0571		134.07	12.5545		133.147	26.3884	22.5852		133.355	55.1515	11.5175	4.29281	10.4983	20.1819		133.942	25.7704		134.237	15.8737	10.9733		132.813	30.9085	17.6972
86.854	10.0317		104.268	13.1997	21.9851		86.853	13.4091	12.9919	87.4673	3.71942	28.4113	12.5646	3.72001	13.6308	15.6066	6.83008	16.1451	10.4161		135.747	10.6388		134.811	19.2941	28.573		135.022	48.0703	12.0641	1.69939	10.1757	21.8141		135.616	13.915		135.915	15.3543	7.26394		134.473	29.3576	23.8553
87.922	12.9566		105.552	13.3406	21.3841		87.922	19.5068	14.034	73.145	1.26057	22.5648	17.1204	3.46416	17.3113	14.9592	5.17096	12.464	16.2815		137.423	13.1171		136.476	22.1934	24.7588		136.689	42.3108	10.9181	3.9272	8.41443	24.5461		137.291	20.0662		137.593	28.1932	6.53687		136.132	19.4022	25.7862
88.998	9.10252		106.845	7.83928	27.2041		88.997	19.4252	14.035	77.349	2.07385	20.1482	15.7414	6.12433	16.8171	16.8269	4.52786	6.90284	12.3441		139.098	13.049		138.139	11.1808	23.984		138.356	36.2413	8.12097	6.10751	8.04207	18.0749		138.965	15.2252		139.271	29.5272	9.93898		137.792	22.9086	23.8965
90.073	9.83355		108.136	14.3891	25.0776		90.073	18.6638	15.0843	72.2582	5.2915	19.9041	15.4071	5.95604	16.483	18.0281	5.73752	9.37635	11.6402		140.773	14.2718		139.803	12.5405	21.4775		140.023	27.0891	13.6197	5.85397	5.73894	21.0295		140.639	22.9901		140.948	23.494	8.9082		139.453	4.12273	29.2328
91.142	6.85384		109.416	11.1592	17.2601		91.141	17.9856	13.8716	64.671	5.16755	23.68	20.599	2.28863	14.3561	16.997	3.8929	15.5496	10.804		142.449	11.9209		141.468	10.2247	29.4182		141.69	20.402	14.4084	5.05153	8.16771	14.3565		142.313	16.662		142.626	20.2978	7.13084		141.113	17.8724	22.9246
92.218	8.91673		110.704	10.5851	18.3652		92.217	17.7339	14.6341	55.4538	1.59762	23.4789	18.9178	6.82254	16.5197	16.4419	2.91213	17.3321	6.42172		144.126	13.4098		143.133	14.1245	27.4154		143.357	18.4233	10.6492	6.97381	9.22992	24.0616		143.987	34.3297		144.304	18.65	9.02215		142.774	18.2398	24.7196
93.285	11.0469		111.989	8.54691	24.0621		93.285	14.2287	14.5052	52.9036	6.06635	19.1375	20.9404	6.06396	17.3642	12.5021	6.26198	14.2744	8.2978		145.802	12.9462		144.797	21.3083	26.3994		145.024	13.8379	9.99225	4.46183	6.07344	25.7415		145.662	26.6337		145.982	16.852	4.97283		144.434	21.5041	25.8731
94.361	11.7008		113.28	13.6255	18.9636		94.361	15.8808	12.4093	48.3455	2.49025	26.622	21.5833	5.14712	18.3696	18.5106	2.41063	11.8617	6.27143		147.478	13.9928		146.462	0	17.2694		146.69	8.36484	11.5486	5.16326	4.70949	18.147		147.336	25.3052		147.661	26.4339	3.09448		146.093	29.725	34.9717
95.43	12.8321		114.572	14.5344	24.9416		95.429	15.8364	15.0483	36.7732	6.32998	19.3299	21.9747	5.49134	17.1363	16.5458	3.18413	10.0563	3.16889		149.154	13.5223		148.125	5.89504	28.3105		148.357	9.6559	5.89339	7.92275	0.911028	20.5741		149.01	23.3225		149.338	17.4268	7.00026		147.753	19.8136	26.3984
96.506	9.30854		115.857	15.1462	28.5505		96.505	16.3634	15.4578	22.9815	3.03835	17.3367	16.6338	6.73702	20.1781	18.3596	5.32381	16.4847	4.57694		150.829	12.5241		149.789	10.4363	27.0028		150.024	7.16507	13.8547	9.79702	3.86584	18.5526		150.684	16.1877		151.016	16.238	4.60805		149.414	16.9751	33.7134
97.574	9.67667		117.149	12.4308	26.2835		97.573	12.2134	14.3815	17.703	5.89713	19.4226	20.2613	1.66496	21.0625	20.8648	2.79689	10.2543	7.93184		152.505	13.8091		151.454	6.64627	20.7234		151.691	4.95864	10.8649	1.82797	5.03727	21.5343		152.359	18.5638		152.694	19.4696	4.08585		151.074	35.2539	26.928
98.649	11.6196		118.436	17.9637	29.9717		98.649	17.0302	13.8205	9.26098	6.15474	15.4953	20.1416	6.35461	22.716	17.5866	3.17648	5.41892	11.3523		154.181	14.3374		153.119	14.4644	30.5053		153.358	3.60786	8.62646	5.5159	13.0264	25.8952		154.033	18.384		154.372	14.6427	2.73599		152.734	18.6885	38.4694
99.718	7.91856		119.716	14.0358	22.0572		99.717	16.2999	16.6854	14.642	5.89108	15.057	17.0502	5.91566	24.1161	18.2225	3.9655	12.7132	6.87499		155.857	13.9922		154.783	7.93466	16.6162		155.025	4.23098	12.9703	6.48102	7.65508	23.4037		155.707	26.4092		156.051	17.8133	2.13044		154.395	36.5186	33.8028
100.793	12.021		121.009	12.949	32.5918		100.793	12.8074	13.4415	6.46687	4.14947	22.2283	17.9048	6.08419	28.8618	15.1999	0.735692	13.0773	7.6291		157.533	13.7579		156.448	2.71949	29.5379		156.692	2.66744	11.6568	2.18306	5.69736	21.8964		157.381	26.6404		157.729	14.5843	5.51088		156.054	13.0996	38.9243
101.861	11.4342		122.301	15.7769	31.9225		101.861	17.3966	13.0602	6.96388	1.10374	18.6909	19.5715	3.37925	28.1441	13.4342	3.23711	10.9976	9.36896		159.209	15.1455		158.111	3.92597	20.5811		158.359	4.53085	13.7386	6.19358	9.16254	19.1397		159.056	18.5869		159.406	9.81572	0		157.715	21.8276	35.2366
102.937	9.63729		123.585	13.4027	27.4276		102.937	14.9053	15.4758	2.71673	4.6204	10.5572	13.6512	4.31264	30.9765	14.7915	1.70829	11.3794	7.47594		160.884	14.9943		159.775	22.8539	32.0755		160.027	1.93342	10.8345	7.83444	6.92048	17.6938		160.73	20.1819		161.084	11.1745	4.91767		159.375	18.3423	35.8173
104.005	9.32847		124.872	10.1108	30.4718		104.005	17.7758	13.2393	8.41759	6.66588	25.4263	15.229	0	30.8292	16.4423	4.23795	8.42924	12.3285		162.561	15.2584		161.441	29.8579	18.5492		161.693	4.52686	13.6786	3.57623	9.2359	21.2869		162.404	20.279		162.762	14.8149	4.14856		161.035	38.0483	43.4591
105.082	12.7843		126.164	17.3412	32.1902		105.081	13.5075	15.1774	2.63138	4.82691	14.1837	12.8865	6.60123	33.4113	13.4449	3.20971	7.47825	9.41509		164.237	14.5092		163.105	22.5515	20.2184		163.36	4.78954	10.369	9.93421	11.2396	16.5102		164.079	26.3654		164.44	28.3321	4.89816		162.695	14.1595	38.4733
106.157	10.4346		127.445	10.2335	28.746		106.157	16.8612	13.8958	2.03839	3.55013	15.3311	23.6876	7.36398	33.6447	16.4722	6.61427	13.5375	9.96401		165.912	14.1443		164.769	39.743	35.5088		165.027	4.48192	9.37517	11.9129	12.2805	21.1333		165.754	12.6538		166.119	20.2258	5.67105		164.355	8.73305	48.3769
107.226	6.32885		128.732	7.34108	25.9527		107.225	22.2676	13.4056	9.02326	6.16091	12.4776	9.24757	8.91551	33.6852	16.3132	0	17.111	8.33011		167.588	12.9154		166.433	15.0096	19.4947		166.694	3.76569	14.7646	10.5007	10.1386	23.6926		167.427	37.4181		167.797	30.4079	3.68265		166.015	23.4013	47.9746
108.302	12.0224		130.012	7.57454	31.2893		108.301	16.2259	15.5277	6.62184	6.85598	14.2945	12.7315	5.95686	35.6561	24.2297	0.968245	12.9203	6.87765		169.264	14.539		168.097	14.241	36.5952		168.361	1.11526	6.73922	10.081	11.9882	16.9759		169.101	48.8167		169.474	15.2042	3.6309		167.676	12.2623	45.3374
109.369	11.0212		131.305	4.72293	29.8951		109.369	11.887	13.7172	5.1682	7.7551	15.481	21.0855	7.24427	37.6325	12.0653	0.612713	10.4094	12.4687		170.94	14.1601		169.761	14.8943	21.2563		170.028	2.81141	9.75416	14.1724	9.36039	26.7119		170.776	38.747		171.152	16.2545	3.69033		169.336	13.6295	47.6194
110.445	10.0659		132.593	7.62541	30.1236		110.445	16.2265	12.4626	6.44708	4.11076	2.72029	16.1168	6.13481	38.0984	16.704	2.00568	11.3982	5.97176		172.616	15.2613		171.426	14.3305	36.8365		171.694	5.51179	14.7089	15.335	16.067	19.7054		172.45	45.1656		172.83	12.2584	3.27645		170.996	24.0336	31.5402
111.514	9.34286		133.872	7.10107	35.0565		111.513	14.8791	13.5516	3.90351	8.04397	10.4166	18.9873	6.62249	46.1039	17.0071	3.00884	12.769	12.5061		174.292	14.2859		173.091	13.3998	28.5025		173.361	1.8374	13.2007	15.2534	16.8489	25.8486		174.124	75.8937		174.508	30.7164	6.21541		172.656	41.9662	35.8488
112.59	11.0621		135.16	5.02888	31.699		112.589	16.3671	11.7287	5.09021	3.77288	1.66816	6.83328	10.4069	46.9762	14.7276	1.94165	16.1099	10.4342		175.968	14.3303		174.755	11.334	0		175.028	3.1799	15.5751	13.6228	16.1163	24.6205		175.799	100		176.186	29.6688	4.5345		174.316	13.0556	26.7448
113.657	9.32343		136.448	7.3609	34.7408		113.657	9.77281	11.8284	1.86047	3.40088	3.52539	15.0539	5.92625	48.9001	10.3824	2.17771	8.0133	6.27296		177.644	14.8491		176.419	15.7342	17.4414		176.695	2.44827	10.5641	12.266	9.45998	17.9953		177.473	85.1892		177.864	29.0797	5.46996		175.976	30.6435	34.4115
114.734	11.2855		137.728	5.24558	41.27		114.733	10.5602	13.306	3.20663	6.56692	8.179	4.42088	10.7305	53.5037	19.3809	5.71155	15.5118	8.36341		179.319	14.6233		178.083	21.7644	18.3086		178.363	4.15596	12.4083	9.34209	13.5559	20.4769		179.147	80.6796		179.541	20.2506	6.59908		177.637	25.8283	34.6853
115.802	10.2462		139.016	7.88999	40.8776		115.801	14.1874	10.6808	1.19477	1.58996	7.45867	19.3238	5.71811	57.5155	13.8853	3.51184	13.5501	13.1386		180.995	14.8543		179.748	8.86454	13.4054		180.03	2.75885	18.4646	12.6128	14.5386	18.0171		180.821	46.9364		181.219	23.5883	4.17916		179.297	29.3788	35.6948
116.877	8.53075		140.308	6.45343	41.7384		116.877	12.3953	12.3536	0.383024	4.15477	8.29752	15.9433	7.02218	59.6856	15.3327	2.21334	6.82687	9.20545		182.671	15.8563		181.412	15.6443	7.0755		181.696	5.4021	16.1465	9.83866	19.3769	17.8455		182.495	35.0855		182.897	15.0402	1.2961		180.957	39.8642	44.2326
117.945	10.3467		141.592	2.74127	45.5295		117.946	15.6972	13.8001	0	1.59312	0.979121	10.0756	8.79348	62.9438	20.8861	2.27009	11.1812	11.6664		184.347	15.2211		183.077	20.6421	31.7644		183.363	5.88617	10.7491	12.4617	22.5084	28.2464		184.17	26.9558		184.576	30.9942	3.61164		182.617	31.5409	42.1317
119.021	10.1761		142.88	8.14212	49.2432		119.021	15.4336	12.6075	9.06419	0.863149	19.5191	12.0212	5.61744	59.0412	16.2696	6.49489	12.4987	12.5907		186.023	16.7496		184.741	21.0397	31.7644		185.03	3.81914	14.1481	9.68291	21.8751	26.545		185.845	37.8575		186.254	31.3139	3.84257		184.277	35.7025	39.4829
120.09	12.4461		144.161	12.5373	44.8904		120.089	15.5734	15.9691	2.47073	3.53749	10.5992	8.82805	8.28678	60.18	23.7098	8.48609	13.3416	8.59281		187.699	16.8526		186.405	13.4446	16.3045		186.697	0.204033	7.0676	11.6288	31.6867	27.6395		187.518	71.3373		187.932	17.5079	7.31292		185.937	12.2623	39.9936
121.166	11.7629		145.448	8.58399	40.4063		121.165	23.2257	15.3978	9.36399	5.59008	8.38277	7.77038	7.57278	61.4751	16.5093	11.8772	8.63325	12.4978		189.376	14.8695		188.069	16.7536	18.2362		188.365	1.56842	8.89857	10.7798	35.0767	25.3726		189.193	93.8743		189.609	22.4711	6.70284		187.597	18.3211	31.9839
122.242	9.40405		146.736	10.5462	38.5205		122.241	16.7412	14.1503	5.77682	7.92517	11.3384	7.22193	4.02144	65.1382	22.4874	8.64357	13.2095	10.6009		191.051	15.973		189.734	24.8226	12.8725		190.032	0.766236	15.7296	11.233	34.9164	25.867		190.867	63.6012		191.287	28.243	6.75572		189.258	32.1504	29.3305
123.31	10.2379		148.016	11.5902	34.5692		123.309	19.5107	13.7368	5.17214	9.9007	23.594	10.9847	8.50769	64.8063	16.4812	9.17525	11.9027	15.5773		192.727	17.592		191.398	21.8539	27.0539		191.698	4.45223	12.486	8.01481	37.4613	29.3149		192.541	47.659		192.966	21.6403	5.33548		190.918	11.4463	34.933
124.386	12.4834		149.309	8.29119	40.0297		124.385	17.5457	12.6298	6.57872	11.0244	23.7336	12.352	7.88671	63.8794	21.1669	10.7948	10.5319	8.41346		194.402	16.0841		193.063	14.5987	17.5824		193.365	2.55986	12.2291	8.6763	30.977	33.6519		194.216	67.4793		194.644	13.2255	2.97775		192.578	29.1951	32.8363
125.454	12.4263		150.601	13.144	37.1019		125.453	15.1839	14.903	6.80199	6.29431	23.1744	7.27652	5.44813	70.328	18.313	10.8932	12.8921	6.27022		196.078	14.379		194.727	22.7842	23.4311		195.031	2.80741	9.09399	8.63326	24.9303	27.6791		195.891	45.3955		196.322	20.6759	4.45253		194.238	21.6667	36.435
126.53	8.76997		151.88	8.8377	31.3009		126.529	16.9677	13.1412	4.51141	6.53817	17.8284	8.77699	6.43592	69.7431	12.1426	12.7819	13.81	10.835		197.754	16.0564		196.391	15.6371	10.0232		196.699	4.10443	16.6176	12.2238	21.2859	44.755		197.564	27.0828		198	31.0027	4.7502		195.899	11.5487	34.4187
127.598	13.4889		153.173	5.46742	40.0705		127.597	15.5661	17.0863	9.74551	10.1774	25.3757	12.6905	7.52804	70.4209	13.184	16.8295	13.144	8.49881		199.431	15.6466		198.056	21.7636	33.3333		198.366	6.36548	15.0027	15.4472	18.2169	61.327		199.238	14.974		199.677	29.1629	4.81832		197.558	29.6209	27.44
128.673	11.8475		154.464	12.0919	42.7218		128.673	16.1129	14.359	5.65238	6.33715	21.098	4.54649	4.88414	72.0593	16.8699	12.1886	16.045	14.8939		201.106	17.0645		199.72	17.0048	31.2807		200.033	5.95544	12.356	13.0695	13.1494	74.7404		200.912	24.8148		201.355	25.2247	5.98912		199.218	17.505	37.9801
129.741	11.755		155.744	9.85695	43.3015		129.741	15.6994	14.6377	7.87795	10.0779	22.9721	3.14661	6.23801	67.1215	15.2223	14.671	16.2544	9.87042		202.782	17.0129		201.384	12.7909	23.5514		201.699	5.9213	14.2568	11.2637	13.7627	90.6992		202.587	22.8141		203.034	17.6717	4.41022		200.879	22.7689	30.8624
130.818	10.8797		157.032	9.31656	36.0672		130.817	19.905	16.2223	6.74895	7.4063	28.0371	11.4073	8.4339	67.0851	10.975	14.1908	10.8135	10.1683		204.458	18.5394		203.049	7.66528	19.0316		203.366	4.28837	13.8042	14.3444	12.4788	72.2653		204.262	23.1816		204.712	20.8372	6.92823		202.539	30.2761	30.2612
131.885	11.0587		158.324	12.5409	43.9713		131.885	17.1434	14.2093	9.0448	7.8032	23.1837	3.91492	5.08059	66.2342	16.0861	16.7302	17.0984	11.0571		206.134	16.8845		204.713	19.4993	21.1353		205.034	1.46373	13.5661	22.573	8.5564	53.49		205.936	19.055		206.39	22.7962	4.88784		204.199	3.93902	28.4102
132.961	12.1865		159.605	12.0119	38.8366		132.961	19.0806	17.5829	11.7251	12.1567	18.2053	9.23273	6.58948	68.782	12.1655	17.1597	11.3751	13.8772		207.81	16.5511		206.377	26.4775	20.3399		206.701	4.71517	12.1472	17.0752	6.09868	35.3445		207.609	22.3753		208.068	34.9596	6.34333		205.86	10.5489	31.4352
134.029	12.2753		160.897	11.0581	37.3438		134.029	21.0818	14.2227	2.81587	10.6335	18.9329	17.2862	6.36539	68.9024	9.16451	19.5112	13.9466	14.2436		209.486	16.152		208.041	18.0694	22.4643		208.368	2.58439	11.3472	22.267	7.35852	39.4584		209.284	26.6553		209.745	29.7631	7.1622		207.519	32.048	29.9615
135.106	9.56943		162.181	7.6911	41.5591		135.105	20.6085	14.5599	6.35595	10.4716	25.1667	12.5437	6.87205	67.7273	13.1731	17.4345	14.5034	16.5137		211.161	15.7479		209.706	44.7889	11.6942		210.035	4.53942	14.0302	35.9452	11.1372	46.9724		210.958	13.8103		211.422	22.0013	5.33913		209.179	17.505	31.2219
136.174	10.7678		163.469	11.2373	49.3067		136.173	18.2898	15.1829	6.76463	11.9003	14.7255	8.25952	10.1348	66.6799	6.90701	20.3464	15.1229	9.13611		212.837	17.4261		211.37	33.796	27.7278		211.701	1.97269	12.8478	48.5104	10.6894	60.2024		212.633	12.1438		213.1	14.9736	4.74882		210.839	7.65201	26.434
137.249	9.16138		164.756	10.6887	43.0357		137.249	30.1463	15.8466	4.13262	12.966	23.2388	10.7778	8.20732	64.8645	9.65508	21.0711	16.9617	10.4977		214.513	17.7565		213.034	22.264	22.152		213.368	5.49995	8.60948	76.8384	9.77207	84.7282		214.307	20.3078		214.779	26.4478	4.31199		212.5	29.725	29.2602
138.325	9.56469		166.041	8.18595	39.723		138.325	30.2147	15.9768	1.91722	13.7335	21.5135	10.0115	6.62358	64.7728	9.93783	23.1481	12.5154	7.88656		216.189	17.3095		214.699	18.0432	18.7904		215.035	3.2153	14.0664	95.6801	6.23863	77.1407		215.982	28.9657		216.457	20.9897	5.76487		214.161	18.6072	25.9174
139.394	11.5938		167.329	11.8473	45.8184		139.393	34.7582	16.3321	12.2308	16.8362	16.974	10.571	6.83936	63.532	7.3827	23.9619	17.0805	14.9194		217.866	17.1795		216.363	17.1206	33.6463		216.703	1.93264	14.4052	100	5.4504	99.0242		217.655	15.0583		218.135	30.1687	6.60626		215.821	26.365	35.0482
140.47	12.3854		168.617	12.8516	49.5682		140.469	30.7172	13.8013	4.28364	17.9599	14.239	11.4621	7.99118	65.6783	15.222	24.8791	10.704	9.55554		219.542	18.1135		218.027	18.5501	22.3932		218.369	4.37271	13.9527	91.1063	6.40673	100		219.329	15.5256		219.812	23.555	9.32399		217.48	20.137	30.9615
141.537	12.2843		169.896	16.7145	45.3259		141.537	34.5785	16.99	6.84251	13.7562	22.3195	10.9009	8.20506	60.1993	14.6741	24.6496	17.2673	11.8477		221.216	17.2889		219.692	11.6292	15.0965		220.036	3.44914	10.0028	93.1721	8.08624	63.1261		221.004	16.4605		221.49	9.90744	4.10562		219.14	33.9891	29.1244
142.613	10.5292		171.188	10.7379	50.8136		142.613	33.7609	19.7454	7.05053	15.9104	27.0747	11.0428	7.61328	66.3218	13.6649	25.7065	14.2907	9.65764		222.892	19.569		221.356	17.2738	17.3916		221.702	5.16459	11.5062	86.6835	6.685	64.7615		222.679	25.8356		223.169	14.9202	10.1913		220.8	27.4817	25.0161
143.681	12.8079		172.48	8.47853	55.0912		143.681	37.2711	14.0352	10.9801	14.86	29.4369	12.1251	10.1946	63.4596	11.3553	26.2499	6.72267	4.24456		224.568	19.5689		223.02	12.6304	9.61247		223.369	5.42363	7.959	89.1762	12.4136	49.266		224.353	12.3352		224.847	26.2145	5.73087		222.46	31.0922	28.3303
144.758	12.555		173.76	7.12036	49.7573		144.757	37.4668	15.4654	6.89851	20.8922	21.2918	8.69952	4.59454	59.1698	16.0824	26.1122	8.46763	13.2766		226.244	21.5285		224.685	11.4759	21.6895		225.037	7.27716	14.723	94.5639	13.1368	63.9335		226.027	25.1804		226.525	18.8721	3.95086		224.122	20.6881	31.572
145.825	13.1279		175.048	9.43431	52.3091		145.825	40.9144	16.6502	8.15871	24.2953	23.1354	13.013	7.9368	61.8302	12.7963	31.2795	13.3673	9.83236		227.921	20.6081		226.35	12.926	27.0041		226.704	8.59363	13.9455	94.3689	14.0992	68.089		227.701	27.464		228.203	20.1945	5.66853		225.782	17.4238	32.6304
146.901	13.0719		176.329	11.2392	59.3926		146.901	45.5595	15.64	5.38805	22.5679	23.007	16.4679	9.37737	57.2391	12.2725	30.1934	9.45533	14.8021		229.597	24.508		228.013	14.1765	37.8731		228.371	10.3112	10.1764	75.9723	6.78911	59.0001		229.375	23.0052		229.88	26.3449	8.69678		227.441	24.887	24.052
147.97	11.518		177.621	11.1582	52.2573		147.97	45.3584	14.0347	4.60121	23.7874	23.0438	13.8069	6.98767	57.6806	10.9292	27.0093	15.8014	15.5098		231.272	27.1115		229.678	11.907	17.4602		230.038	7.74835	13.3011	63.4367	3.46857	66.9739		231.049	22.918		231.559	25.5892	10.5081		229.101	23.0111	26.1387
149.046	14.753		178.913	3.87894	60.7487		149.045	49.209	14.387	7.72081	21.5372	18.4503	8.74912	6.49832	55.7615	17.6347	28.4449	3.75898	9.56755		232.948	26.8239		231.342	12.13	31.2303		231.704	11.2584	12.4369	50.7062	9.80589	61.0151		232.724	25.8192		233.237	19.5339	5.10768		230.761	41.7613	24.7568
150.113	15.4161		180.196	5.54139	52.7644		150.113	46.8982	14.8963	5.7002	21.2231	29.7479	11.2576	3.01266	52.8367	15.8572	31.1351	8.49647	16.3851		234.623	31.1614		233.006	19.1606	25.8969		233.371	8.48143	13.7639	40.2059	5.54189	47.447		234.399	15.4816		234.915	21.5011	6.83367		232.421	18.482	33.0758
151.189	12.1263		181.489	3.51823	63.7322		151.189	41.7597	15.4544	4.97376	22.4725	21.0136	12.0247	8.0041	53.7089	19.2705	29.5891	18.2354	5.74352		236.3	36.1036		234.671	12.38	21.2563		235.039	9.79989	14.0687	32.1819	7.62555	42.9375		236.073	18.416		236.593	24.9223	8.13606		234.082	23.8499	32.5578
152.266	12.6194		182.777	8.03255	58.1138		152.265	54.0566	12.6976	7.92036	20.72	21.8285	6.307	7.26604	53.699	17.8957	29.6051	9.06977	13.3131		237.976	44.878		236.336	13.6506	28.3324		236.706	11.8669	14.1059	27.4035	9.48093	54.2204		237.746	9.14449		238.271	20.6175	6.69314		235.742	21.9528	32.7767
153.334	11.1011		184.06	2.6637	63.8881		153.333	51.0025	15.5419	7.22407	23.9123	12.9358	8.10109	7.64216	48.9077	14.9045	29.5571	17.5498	10.1009		239.652	58.4704		237.999	29.0449	26.2804		238.373	10.6903	16.0977	22.0153	5.132	54.6141		239.42	14.8716		239.948	24.961	10.3791		237.402	14.2475	32.6675
154.409	15.9162		185.352	6.64512	56.1225		154.409	52.8736	14.5185	7.5936	21.7711	29.7111	3.21873	10.1219	48.312	9.89257	31.777	10.5892	12.0433		241.327	72.8186		239.664	12.111	22.7766		240.04	12.0009	16.93	16.9746	8.00592	56.994		241.096	25.4579		241.627	21.8238	5.01651		239.062	5.65245	29.7782
155.478	16.3774		186.644	2.89523	58.7728		155.477	56.124	14.7753	9.77498	23.7904	21.4636	7.59494	4.16169	42.8311	10.867	29.6922	16.9668	11.4189		243.003	78.2965		241.328	7.71044	19.8568		241.706	14.8554	18.8283	10.8002	7.45203	64.2846		242.77	13.494		243.305	25.3751	5.62798		240.722	23.585	31.9949
156.554	14.1014		187.928	5.0628	62.082		156.553	54.2147	12.4993	8.55914	24.3169	26.544	9.55536	7.80546	43.3506	10.6	32.238	12.7152	5.55935		244.68	87.6689		242.992	7.73663	27.4865		243.373	12.2338	16.9141	10.5674	10.579	57.1571		244.444	19.778		244.982	13.0308	7.85816		242.383	16.8582	23.2601
157.622	14.7692		189.22	0.685591	68.1917		157.621	56.9743	15.0248	7.60311	26.4818	21.7801	10.6606	5.29043	38.4759	15.0386	31.2986	12.7301	13.2744		246.356	89.0467		244.657	21.0397	30.9897		245.04	11.144	21.7189	3.94234	16.6908	51.9057		246.119	14.7011		246.66	9.21818	5.85956		244.043	12.5273	24.2831
158.697	12.964		190.512	6.39043	62.3828		158.697	62.9777	15.5449	6.37398	27.9776	29.4875	8.16739	6.38723	37.4905	16.9383	29.6798	10.0131	8.70678		248.031	93.9569		246.322	17.8456	27.8998		246.707	18.3318	15.895	4.03082	12.2461	42.7744		247.792	16.9795		248.338	4.72456	6.46447		245.703	19.9533	22.4247
159.765	16.9781		191.792	3.93903	67.0468		159.765	67.0062	12.5779	8.8152	28.2532	17.8972	10.7219	5.26189	33.0883	19.9879	31.6601	9.9888	12.8154		249.707	88.8289		247.985	18.2303	23.6225		248.374	18.2842	24.0458	9.47496	10.6466	46.255		249.466	15.4232		250.016	23.9267	7.70931		247.362	2.67428	23.5091
160.842	19.0759		193.085	3.36232	73.0911		160.841	74.0999	14.3242	8.43599	31.9672	23.7412	8.56787	6.56501	30.4992	13.6557	31.0222	19.0203	3.98707		251.382	88.5676		249.649	9.95571	25.4333		250.041	21.9249	20.0059	6.65831	9.76859	47.3422		251.141	23.8905		251.694	19.0419	8.48298		249.023	38.0483	32.2386
161.91	15.8333		194.369	7.64239	70.7485		161.909	76.1737	11.8908	9.04672	29.4313	13.9039	10.494	6.09811	27.374	18.4105	31.663	1.33162	8.4805		253.058	87.496		251.314	7.80037	13.1143		251.707	21.9712	22.4727	6.94905	11.1461	46.4463		252.816	14.575		253.372	16.9019	8.09954		250.683	7.1009	29.0041
162.985	17.4262		195.661	1.47997	72.8976		162.985	74.31	13.096	5.74336	30.7513	22.8613	11.7197	3.86241	25.5314	17.2845	33.3034	17.0715	8.85075		254.735	86.677		252.978	12.6308	25.2425		253.375	22.3889	20.3453	2.31559	5.42944	29.9956		254.49	18.9514		255.05	20.6647	3.38788		252.344	22.1365	30.078
164.053	18.1294		196.948	6.30356	71.9889		164.053	71.7986	12.3478	4.53436	36.3796	22.0075	8.49643	9.19502	22.2541	15.7965	34.7815	10.3542	10.661		256.411	85.1724		254.643	17.7738	16.375		255.042	24.4818	15.8303	3.57399	12.0723	36.7972		256.164	14.4824		256.728	35.3521	7.31166		254.004	6.65223	27.7852
165.129	17.75		198.233	8.13614	70.0797		165.129	72.6475	15.6519	9.64671	37.6777	13.8856	6.89396	11.1808	20.2397	15.2948	34.677	21.4259	7.71971		258.087	83.6618		256.308	9.27583	25.2419		256.709	23.997	23.9911	0.263527	6.63161	30.1062		257.837	13.1327		258.406	24.6858	5.81877		255.664	15.3429	30.4214
166.198	16.0867		199.52	7.97228	74.761		166.197	76.4239	15.0799	9.14431	36.958	26.2753	7.21618	3.66535	16.3201	14.3861	34.4095	12.5303	8.64902		259.763	79.1297		257.971	11.3602	17.583		258.376	22.6264	18.1282	4.81899	8.84123	37.0725		259.513	14.8284		260.084	26.487	6.39484		257.323	25.8495	31.2436
167.273	18.4344		200.808	3.63629	63.6799		167.273	72.921	12.8367	7.31637	36.9883	9.21178	9.3198	8.84009	16.7662	16.3176	39.4175	22.1098	6.5933		261.438	75.2814		259.635	15.3951	20.9652		260.043	25.5219	19.0854	3.61704	7.70847	30.896		261.187	21.8198		261.762	27.6068	2.95811		258.983	19.6883	31.3183
168.349	21.5265		202.092	5.78866	73.0657		168.349	70.8099	12.5901	3.68156	36.548	26.1637	7.99144	4.13871	14.701	12.5201	38.7217	13.6177	11.9663		263.114	68.1612		261.3	13.9902	29.3277		261.71	23.8261	18.2886	4.91072	6.61875	31.4107		262.861	9.1613		263.44	22.5269	3.04335		260.644	19.2396	30.9804
169.418	22.096		203.384	7.0338	67.3535		169.417	68.764	12.6744	5.4407	39.0653	17.9301	8.28771	5.3161	14.1489	14.3401	37.401	14.4183	12.9443		264.79	60.5582		262.965	14.1958	20.6031		263.377	26.1261	18.2291	9.15981	9.11546	20.2081		264.535	15.4221		265.118	23.0353	7.73551		262.305	37.0485	17.7366
170.494	20.0112		204.677	9.16239	67.087		170.493	62.8583	12.5546	3.21658	38.4452	7.03779	8.17505	3.11959	13.6203	11.3483	39.9259	14.9854	11.5274		266.466	52.8996		264.629	17.8908	22.0529		265.044	27.3544	20.4854	5.29626	12.2823	27.7306		266.21	24.4624		266.796	19.756	7.0165		263.965	28.3578	32.9305
171.561	22.0152		205.96	3.38831	69.489		171.561	58.2849	13.194	3.29968	38.438	13.5251	9.29574	3.11813	12.841	13.198	33.5314	20.1232	16.8908		268.142	47.2394		266.294	15.331	18.3584		266.71	27.4613	15.1382	3.97488	10.947	25.6543		267.883	7.32534		268.474	24.4579	3.65268		265.625	12.976	28.1043
172.638	25.8136		207.248	8.01747	63.0991		172.637	52.5991	14.3629	4.02054	36.4981	17.0304	8.51285	6.03676	11.388	10.046	37.9261	11.2624	15.9845		269.818	42.3387		267.957	13.9898	30.797		268.377	29.1775	20.5274	8.00724	11.422	26.5169		269.558	1.45872		270.152	17.6298	9.13095		267.284	16.8727	26.5021
173.705	25.5769		208.54	1.50513	66.2232		173.705	52.5132	13.5595	6.37824	41.7335	12.3285	11.6362	7.73185	10.0206	14.9603	37.1808	14.2483	12.9263		271.493	37.7631		269.621	20.0195	37.1986		270.044	26.2984	16.084	7.39449	11.0672	28.095		271.233	15.8643		271.83	16.588	10.253		268.944	20.6881	31.796
174.782	24.928		209.82	4.29151	69.4425		174.781	46.3539	11.176	4.6426	41.5539	7.04991	8.76953	7.79738	8.94922	15.0774	36.4035	18.6149	12.4603		273.17	32.7645		271.286	17.0052	25.8465		271.711	30.4859	15.7854	7.54233	8.75807	28.8582		272.907	20.2403		273.508	14.8152	9.70729		270.605	21.218	25.0793
175.85	29.0606		211.112	2.12943	73.0361		175.849	47.8044	13.091	4.43181	45.3979	15.9465	5.9262	0.346401	7.50574	11.0179	40.077	18.7325	15.3627		274.846	29.4713		272.951	16.8254	28.6945		273.378	27.3089	12.54	6.55744	9.67225	18.8709		274.581	12.386		275.186	10.4604	8.62588		272.266	19.0559	29.9981
176.926	31.1385		212.396	5.9669	73.2636		176.925	44.0973	11.1256	3.42399	40.4816	14.7939	10.812	6.36748	10.0985	14.8863	35.2279	10.085	14.2722		276.521	25.4238		274.615	14.0353	24.1554		275.045	24.515	20.2295	10.1946	9.05552	30.9902		276.255	6.65753		276.864	5.23837	9.0593		273.926	13.2621	32.1201
177.993	29.9408		213.689	5.92675	70.638		177.993	37.2144	11.8885	1.98354	42.9665	1.17956	6.15273	6.11381	6.70093	11.3304	34.4743	11.2262	16.5921		278.197	23.9842		276.28	18.0698	32.1971		276.712	24.841	21.8224	6.42283	9.00584	22.8154		277.929	19.7495		278.543	8.36763	10.9803		275.586	34.8636	33.154
179.069	33.6138		214.976	13.1108	74.1361		179.069	39.7306	14.6054	7.21233	50.1024	0	8.43498	10.0907	5.78076	19.9617	37.1092	8.99758	22.3137		279.873	21.8682		277.943	17.1657	22.7773		278.379	22.8215	13.9193	8.635	5.00403	23.8455		279.604	16.2462		280.219	11.847	10.2204		277.245	12.711	30.3458
180.138	30.9		216.256	8.54545	73.3178		180.137	31.0056	12.9888	4.8326	51.0254	12.3532	4.8164	5.45718	6.4828	17.4509	34.8389	17.0331	31.4402		281.549	19.2281		279.607	17.8904	18.7917		280.047	19.5553	17.2377	10.9442	10.842	27.6117		281.278	16.6288		281.897	14.148	9.3712		278.905	23.3801	30.9791
181.214	34.9274		217.544	9.97689	70.1312		181.213	32.2208	16.9934	3.83743	57.2401	16.4089	5.59586	4.81393	6.06488	16.7211	35.9594	15.745	56.768		283.225	20.7825		281.272	16.9601	28.2115		281.713	23.2818	14.8886	4.609	4.91884	18.797		282.952	12.6081		283.575	34.44	10.1124		280.566	22.2178	35.191
182.282	35.4037		218.832	7.12677	65.2108		182.281	22.4961	14.777	5.96572	67.8534	13.495	7.05295	3.05839	5.79774	19.1814	35.0348	13.0939	61.67		284.901	17.5079		282.937	3.42515	7.9201		283.38	18.1772	19.0579	5.53674	10.3836	18.0235		284.627	20.5352		285.253	14.965	8.85984		282.226	16.2403	30.2113
183.358	39.6443		220.113	12.6864	65.8155		183.357	22.8646	14.7665	5.27014	80.3622	16.6393	3.39319	6.05762	3.61364	15.7225	35.5976	11.1033	85.5315		286.577	19.0895		284.601	12.3538	9.66165		285.047	15.8563	14.4124	6.87193	8.01942	23.8554		286.301	22.1384		286.931	12.9391	12.4473		283.887	10.6302	23.6449
184.434	37.2928		221.404	12.7008	66.0463		184.433	25.043	20.143	7.61097	80.9186	20.1916	6.20381	8.14698	2.52706	10.8183	37.8631	13.9005	92.8635		288.253	18.0378		286.266	11.6554	12.6817		286.714	14.4604	15.1543	4.41399	12.8887	16.246		287.975	21.6174		288.61	23.7548	10.9558		285.547	0.579043	25.928
185.501	42.0131		222.697	10.5235	61.8142		185.501	15.3192	17.0624	5.94939	84.7547	12.7945	6.48953	8.44797	5.1132	16.1766	35.0157	6.17917	91.5416		289.928	19.5313		287.929	16.1197	35.9201		288.381	11.8955	11.9902	1.16356	11.5712	21.9247		289.649	13.9146		290.287	23.2486	11.8078		287.206	32.5407	38.9969
186.577	46.158		223.98	18.7112	58.383		186.577	21.5932	18.4967	2.66548	84.2163	22.569	5.41305	6.59381	5.67382	11.4916	39.6417	14.1431	96.2618		291.604	17.5406		289.593	9.82142	21.9314		290.049	10.7793	16.4874	4.81692	8.40181	18.269		291.324	20.774		291.965	16.21	12.8317		288.867	6.65223	35.5613
187.646	49.7626		225.268	12.5303	49.9765		187.645	24.8441	19.9155	5.46698	78.5101	14.4971	5.0567	8.66234	4.9693	12.3304	39.5647	15.9479	100		293.28	16.7892		291.258	19.5651	17.0476		291.714	7.77201	11.2359	6.63852	9.31939	16.8708		292.998	24.7166		293.643	29.9714	11.5208		290.527	18.2983	26.3198
188.722	56.5518		226.548	16.2735	52.887		188.721	17.4741	18.1977	6.19755	76.4972	22.5555	3.10224	7.38729	6.0169	15.9582	39.9091	16.4282	97.5214		294.956	17.8271		292.923	17.2553	28.4327		293.381	7.67297	18.1624	10.4692	12.2487	15.0094		294.672	13.8972		295.321	30.0743	8.14928		292.187	20.1954	34.9545
189.79	56.3716		227.836	15.2478	46.1556		189.789	18.9187	21.0438	2.44025	72.6047	15.4152	8.67554	9.84307	4.49804	16.6993	38.6709	16.4411	85.5349		296.632	16.7358		294.587	26.9787	25.917		295.048	6.48152	14.8372	7.92446	7.34792	11.0077		296.347	18.0338		297	15.4205	10.2338		293.847	15.9753	33.9067
190.865	69.5378		229.128	5.98247	48.3434		190.865	15.5878	24.298	11.496	73.9741	24.2403	10.1577	6.82222	3.46105	16.243	39.7697	10.4188	76.9285		298.308	16.5109		296.251	11.7453	20.0489		296.715	5.16897	15.2597	8.8264	6.87405	14.5989		298.021	19.2687		298.678	29.2101	9.633		295.508	19.3793	29.5149
191.933	75.1036		230.412	4.61273	46.8193		191.933	17.513	22.7287	9.10129	65.2059	26.1628	8.35267	12.4676	5.92254	20.4774	41.5544	13.2846	77.9383		299.984	16.8253		297.915	18.7105	22.031		298.382	3.30896	15.7921	8.12775	6.41506	19.2651		299.695	32.5504		300.355	27.3591	10.2708		297.167	31.4384	30.915
193.01	75.7753		231.704	10.2857	43.3798		193.009	14.2287	26.6074	1.94765	58.7557	33.3964	14.5425	10.1909	4.61388	12.2377	43.6941	13.7325	69.8703		301.66	16.2737		299.579	20.0191	17.2209		300.05	5.1541	13.0254	11.3914	13.3405	22.9192		301.369	26.973		302.033	18.0524	6.63296		298.828	22.2178	32.058
194.078	80.9418		232.993	13.7612	42.9836		194.077	16.9804	26.0708	3.91275	53.5103	29.8393	10.9384	12.0264	6.52536	9.12676	42.982	4.03547	60.7234		303.335	17.5813		301.244	17.8448	23.7926		301.716	4.05217	13.1612	11.0134	11.1653	17.6988		303.044	26.4526		303.711	28.9323	11.1565		300.488	14.3432	25.4412
195.154	82.2674		234.277	12.0956	48.424		195.153	15.3507	30.2903	10.0911	53.361	14.021	10.5053	14.4834	6.51365	11.6219	44.5337	19.5886	57.7953		305.011	17.0256		302.909	24.0987	20.7738		303.383	3.14143	9.70462	9.50595	6.71655	20.9518		304.718	20.1282		305.389	19.2947	14.7613		302.148	10.8139	25.7912
196.222	90.0871		235.565	11.5005	32.9275		196.221	18.6739	35.7951	11.9569	52.3951	23.8413	11.2316	10.8991	5.08491	12.62	43.9696	6.24028	43.4644		306.687	17.4715		304.573	29.6353	19.3427		305.05	5.35065	11.9299	10.9769	7.51052	15.6479		306.393	32.2118		307.068	13.9979	12.7232		303.808	2.12317	27.1387
197.298	89.5267		236.853	12.6102	29.5673		197.297	17.3056	44.1318	4.53527	47.5284	14.4732	11.433	14.5747	5.55487	13.3377	44.0022	9.17497	38.4125		308.363	16.3532		306.237	31.1023	19.4449		306.717	4.79131	11.4209	6.95213	14.1296	18.3895		308.066	28.8959		308.746	26.3894	9.9386		305.468	14.1595	31.566
198.366	93.1083		238.137	12.6699	33.2037		198.365	14.8717	56.6394	10.7919	44.2075	29.2426	11.5212	17.3893	4.05865	14.2037	43.1403	5.54359	37.6371		310.04	15.6397		307.901	26.3884	15.5304		308.385	4.48543	10.1964	9.47342	9.59565	15.2534		309.741	28.5569		310.423	18.2084	12.6986		307.129	27.7466	27.1364
199.442	96.501		239.429	16.3925	39.0925		199.441	16.5173	66.8946	11.3956	44.7756	23.9559	12.7943	16.1588	7.45852	9.97394	44.5972	12.1695	32.5789		311.715	15.2046		309.566	27.363	21.5686		310.052	2.97318	11.9232	7.26849	12.3565	19.2437		311.415	33.1628		312.101	25.5113	13.0419		308.789	14.2263	27.8661
200.518	97.9111		240.72	12.8225	37.7544		200.517	16.9425	78.9073	6.38554	44.6385	23.4082	9.56211	15.8153	8.45237	8.5111	45.0362	16.1376	29.0027		313.391	15.7279		311.23	21.7636	21.4477		311.718	3.33927	15.7769	14.9811	14.1491	29.7227		313.089	25.4537		313.779	30.2578	8.29825		310.449	12.8947	32.9849
201.585	95.2036		242.004	10.9853	33.0337		201.585	14.6698	91.5184	9.11305	40.9943	25.4682	11.9556	15.6247	7.52053	12.6953	47.3032	11.6587	28.3079		315.067	15.0592		312.895	26.8706	24.8311		313.385	5.73807	14.3686	9.4951	7.71276	20.3385		314.763	22.833		315.456	26.6286	13.3873		312.109	30.2761	33.4984
202.662	95.5632		243.292	12.2014	27.1486		202.661	14.6371	96.6871	7.10503	40.0321	25.5672	8.36193	15.5827	8.47103	9.27544	44.7977	7.27114	26.4628		316.742	13.8227		314.559	17.9985	11.4737		315.051	4.15129	15.2486	3.61738	18.1739	24.8549		316.439	13.5809		317.135	24.6832	8.20267		313.769	13.7108	26.553
203.73	95.5889		244.572	17.2757	30.5787		203.729	6.10015	100	7.08412	41.5709	29.5705	12.4303	19.3574	6.00223	6.12492	43.7476	21.1992	18.79		318.418	16.8297		316.223	25.9146	34.4217		316.718	5.43338	14.6674	5.82559	13.8249	13.214		318.112	21.3992		318.813	30.1746	12.1171		315.429	20.953	35.0255
204.806	93.9917		245.861	14.9926	24.3681		204.805	11.0106	98.6614	9.26136	34.7998	25.3317	5.76201	9.47449	7.57229	6.84264	45.7306	12.5226	16.4204		320.095	16.7127		317.887	14.76	25.4837		318.386	7.82488	14.9463	10.0623	17.883	21.7665		319.786	20.8367		320.49	31.1777	12.8743		317.089	35.0702	25.4721
205.874	92.6156		247.148	14.3626	28.1061		205.873	12.4582	99.3408	6.05624	31.8982	31.7944	9.618	13.5916	8.86596	10.7082	46.1562	14.0597	17.7394		321.77	15.4799		319.552	31.9951	33.7679		320.053	6.98365	16.1299	10.9876	14.2369	20.9687		321.46	19.1022		322.168	40.4569	14.4863		318.75	25.2984	27.4267
206.95	96.8378		248.433	13.7196	31.0901		206.949	12.9039	97.9939	9.87507	29.6502	34.3267	9.6387	11.2776	5.52828	12.4275	45.8055	11.5782	19.0339		323.446	14.78		321.216	20.2885	11.2325		321.719	4.52892	10.7319	8.06818	17.6727	20.581		323.135	22.6833		323.846	33.0038	17.1694		320.41	14.9755	33.0447
208.018	94.7216		249.72	16.1283	26.366		208.018	11.9287	90.8235	7.72667	24.3466	26.7175	6.07839	12.3214	7.16321	11.7819	44.2407	12.703	16.6128		325.122	15.1785		322.881	30.1982	26.5501		323.386	7.19659	12.1493	11.2067	25.2192	15.0129		324.809	15.3362		325.525	36.9802	11.7069		322.07	33.9891	27.209
209.093	97.2819		251.009	12.067	25.8876		209.093	10.7382	88.5225	10.0095	29.285	37.1238	11.1598	8.18043	7.38351	11.4202	45.4353	17.4944	20.0712		326.798	15.1855		324.545	12.3087	9.61121		325.053	5.6388	15.2864	10.1132	33.5538	20.5314		326.484	22.2191		327.203	28.5794	10.9832		323.73	5.83615	31.9638
210.161	100		252.293	8.92884	17.6429		210.161	13.3913	82.5665	10.4094	23.1851	30.1286	11.8684	11.4475	6.6948	9.29139	45.4307	16.2953	12.9361		328.475	15.6908		326.209	24.0088	22.7766		326.721	5.33822	14.8891	11.394	52.4906	17.4403		328.158	22.5422		328.881	35.6548	14.272		325.39	16.0338	31.8541
211.237	98.1306		253.58	12.3327	26.4269		211.237	15.4007	85.2434	5.50695	21.0219	28.573	9.08457	8.09318	8.29702	9.94546	40.779	11.3835	15.3169		330.151	14.9582		327.873	22.9442	16.4261		328.388	5.94746	12.2568	9.30233	84.5831	25.5422		329.832	16.4327		330.558	41.9717	9.03198		327.05	10.0791	37.414
212.306	96.8935		254.872	12.1247	35.5777		212.305	14.6549	80.0215	6.46107	15.8241	26.5291	15.0956	12.2491	6.94144	12.0195	41.7655	20.8314	12.9937		331.825	15.3377		329.538	14.1507	19.0122		330.055	4.68191	13.2448	16.2589	93.452	16.9749		331.506	12.6532		332.236	31.7419	14.0777		328.71	17.8724	30.9721
213.382	96.6248		256.152	15.9194	25.0114		213.381	15.7793	77.6335	9.0282	19.3144	22.6108	11.6246	6.78151	6.20163	11.7466	44.1386	11.0212	11.2627		333.501	14.1624		331.202	16.2794	5.74718		331.721	8.27243	14.5705	19.0924	89.5857	25.9383		333.18	24.2084		333.914	31.8696	13.5393		330.371	34.8865	26.215
214.45	94.254		257.44	14.9412	23.2565		214.449	9.92996	82.1309	9.8432	12.7662	36.1272	7.76194	10.8384	5.13971	10.5403	39.5407	9.96619	10.6198		335.177	15.2476		332.866	16.254	15.9424		333.388	8.50687	15.5832	15.2071	84.0767	28.5136		334.856	21.2417		335.593	21.7072	12.5254		332.031	13.5271	27.3796
215.526	91.1441		258.732	9.35153	24.232		215.525	13.7764	77.8545	7.5511	18.5132	41.4086	6.24464	11.9138	5.41235	17.9433	40.9055	21.1553	17.0567		336.853	15.8805		334.531	22.4176	19.3944		335.056	7.12511	13.1354	14.3929	74.2062	25.7846		336.53	13.8942		337.271	18.0742	13.2396		333.691	7.83571	36.522
216.602	89.9688		260.017	12.4956	29.1657		216.601	15.9363	78.5695	11.2462	10.074	37.6312	10.6477	8.62365	6.19615	14.4475	36.827	8.42082	12.2116		338.53	14.8655		336.195	15.8761	27.2453		336.723	7.7475	12.9157	16.3896	71.8332	22.8925		338.203	14.7894		338.949	24.9637	13.1132		335.352	20.7693	30.8363
217.669	91.3274		261.304	14.0649	28.2672		217.669	16.89	80.0912	9.50045	12.6594	36.1055	8.76931	5.65441	7.51904	12.5587	39.6789	12.9365	7.43226		340.206	15.5387		337.859	14.8043	15.5298		338.39	8.73224	14.4588	11.7933	57.1193	15.6327		339.877	18.3338		340.626	17.2243	15.4324		337.011	8.81432	27.8007
218.746	94.5522		262.584	16.5819	36.2024		218.745	17.6163	76.7177	9.57347	10.2622	38.8955	4.01857	12.2817	6.18739	13.1783	40.4188	12.3754	5.89842		341.881	15.2603		339.524	11.7901	24.5674		340.056	11.3466	16.3196	13.5745	35.9568	25.3081		341.552	11.2755		342.304	37.5943	10.1596		338.671	25.8283	25.8117
219.814	92.2556		263.872	12.9523	26.8166		219.813	13.0873	72.8036	10.0974	11.1728	39.1265	8.16454	4.75157	5.44799	14.0983	38.3583	16.9244	10.3605		343.557	16.6597		341.188	9.07059	18.9618		341.722	11.0025	11.5914	16.0749	22.7353	17.3427		343.227	8.64811		343.983	18.7186	9.97612		340.331	21.9528	42.9245
220.89	88.7626		265.16	10.7915	27.3818		220.889	14.7537	71.1544	5.89951	5.20946	35.7689	7.05016	7.92389	4.81052	13.4334	38.0589	12.9428	8.11046		345.232	16.0191		342.852	14.8943	24.1548		343.389	8.65951	11.8434	21.0729	14.5435	26.1753		344.901	21.7607		345.661	9.93759	12.8021		341.991	21.0115	33.0768
221.958	86.159		266.44	14.4509	28.2752		221.957	12.3577	71.47	11.5981	5.29216	38.0076	11.5451	8.59094	3.72952	13.2285	36.6224	13.6308	8.2431		346.909	15.853		344.517	16.9339	19.5153		345.057	13.389	12.2992	20.2632	11.8368	15.9971		346.575	19.6674		347.339	22.9266	12.2975		343.652	16.9083	38.4007
223.034	85.308		267.729	10.8826	29.2848		223.033	10.8643	70.0121	11.9272	5.25115	48.9862	6.42818	5.4489	2.25334	12.2808	36.0196	15.3892	13.7908		348.585	15.4685		346.181	10.6807	28.5736		346.724	13.6904	18.8948	18.1516	12.6965	21.7947		348.249	24.2509		349.017	22.3408	11.5718		345.313	23.4825	25.6482
224.102	82.61		269.016	13.5651	37.2488		224.101	10.5271	65.3185	8.28825	5.8355	39.9765	6.89176	7.55563	4.12864	11.9147	32.924	23.0345	12.6878		350.26	15.8389		347.845	10.6803	22.2224		348.391	12.3098	13.992	23.0699	7.41329	25.4896		349.923	18.7169		350.693	15.001	9.91633		346.972	12.3436	30.0385
225.178	81.2156		270.296	8.87569	30.4462		225.177	14.1947	59.6381	10.378	6.60254	40.2563	7.80507	5.60034	4.21896	14.5565	35.5529	16.1677	9.13422		351.936	13.8311		349.51	11.9058	28.5736		350.058	12.2575	14.6272	24.324	6.09148	22.1309		351.597	19.8117		352.372	24.0523	11.9547		348.632	0.939684	25.3165
226.246	83.7127		271.584	8.37782	31.392		226.245	12.9122	56.662	10.7842	4.40642	32.5236	8.64891	6.11058	2.78075	16.0122	37.6441	14.7292	15.9367		353.612	14.5718		351.174	21.6555	31.7644		351.724	10.9518	16.819	25.1814	5.9538	16.2659		353.272	14.3185		354.05	33.0116	9.25184		350.292	17.0564	31.3699
227.322	77.9878		272.877	10.3668	30.4019		227.321	12.0291	49.1182	7.3548	3.64013	49.3326	4.85867	7.12932	3.99486	11.7964	36.4206	15.7325	10.1491		355.289	15.3536		352.838	22.6938	31.3512		353.392	14.4345	13.9877	38.0929	6.52321	21.9594		354.947	25.5797		355.728	13.9979	14.8997		351.952	12.9971	31.4673
228.39	79.0678		274.161	5.99887	34.1775		228.389	15.4007	44.7719	12.1726	2.70187	42.077	8.18181	3.289	4.35585	14.7099	38.4952	18.1925	10.7711		356.965	14.8395		354.503	19.4296	16.2553		355.059	15.3638	17.0368	50.259	9.76261	17.3214		356.621	10.6418		357.406	20.5508	12.0328		353.612	51.6355	29.665
229.466	77.063		275.449	13.8446	30.8345		229.465	14.2576	41.6481	9.30013	5.92794	46.9977	6.95957	2.58201	3.59812	15.3137	38.4349	22.8981	9.51781		358.64	14.036		356.167	20.5651	29.0573		356.726	16.0657	17.1143	67.0965	3.28268	28.1774		358.294	12.2592		359.084	14.4986	11.9944		355.274	50.3268	34.1352
230.534	79.7667		276.732	8.79197	31.5002		230.533	11.557	39.1353	11.1806	7.76514	43.7708	4.97018	2.95032	4.48045	14.0074	43.4597	23.4158	12.7438		360.315	15.4903		357.831	22.1934	22.635		358.393	15.6933	14.4803	76.9735	5.74007	20.0175		359.969	22.8155		360.761	23.9441	8.13305		356.933	64.0976	35.5042
231.61	76.8427		278.025	2.967	27.9547		231.609	13.9784	37.3283	11.2678	3.70615	42.0283	7.18644	3.24327	2.67199	10.8134	36.3188	31.6245	9.76474		361.991	14.2562		359.496	24.5278	11.6651		360.06	18.0679	11.8645	72.0048	5.75617	22.1111		361.644	20.2956		362.44	18.4247	12.1389		358.593	39.5992	26.1602
232.686	73.9807		279.316	1.18415	35.819		232.685	10.5989	30.8244	6.78933	7.23817	35.8104	8.45353	5.67058	5.35916	9.28617	37.3429	33.5757	7.31968		363.667	16.4778		361.16	24.4383	23.984		361.726	14.5711	15.6025	70.218	4.43235	25.4484		363.318	17.4876		364.118	28.6657	12.8268		360.253	45.3118	35.8864
233.754	72.1622		280.596	8.31281	30.0038		233.753	14.8067	27.8645	8.94082	6.98673	40.8653	8.36283	3.85938	6.06255	8.98711	40.6403	42.0457	12.6255		365.344	14.8145		362.824	24.1693	26.8625		363.393	14.7096	17.4831	71.1612	7.37195	32.9673		364.992	21.307		365.796	25.3143	12.4083		361.913	57.6487	30.1803
234.829	69.2765		281.884	8.20529	26.0311		234.829	11.4446	23.2914	12.0736	6.14976	38.7915	9.18678	0.5133	4.84834	10.8788	41.8881	45.7653	10.728		367.02	15.8346		364.489	19.1788	17.3916		365.06	16.8942	12.0939	72.5109	4.51955	35.4863		366.667	24.9069		367.474	29.4408	11.9482		363.573	42.0474	39.6755
235.897	66.6913		283.176	11.0242	33.521		235.897	13.435	19.8229	8.09313	1.99675	40.6785	5.34178	7.09898	6.04031	10.7204	41.052	48.4657	6.24248		368.696	15.1968		366.154	15.4395	16.1338		366.727	17.28	14.3133	80.2432	11.8916	50.3014		368.34	10.9176		369.152	28.8824	11.3561		365.234	24.666	34.047
236.974	65.5783		284.461	4.55039	36.5959		236.973	11.7895	16.8284	10.156	8.17089	42.0714	9.26761	1.51599	4.22336	10.7877	44.7654	47.494	14.436		370.371	16.8111		367.817	18.615	20.7033		368.394	17.1676	16.8184	72.0626	2.62404	69.7871		370.014	20.7203		370.829	29.3909	10.08		366.894	20.6881	25.696
238.041	66.0556		285.753	9.61559	36.1232		238.042	13.7769	16.5946	5.62581	8.00518	37.0264	9.8876	5.53114	6.47756	11.659	44.2402	51.604	4.60251		372.046	14.9912		369.482	19.4925	10.3361		370.061	18.7594	15.9255	59.1197	11.6512	80.5558		371.689	16.8721		372.508	17.8442	10.2499		368.554	7.91697	36.185
239.118	61.6529		287.044	1.75531	39.5575		239.117	13.0757	16.5353	8.99244	4.51689	35.2647	8.77098	8.78438	6.86413	13.5641	45.0043	49.3469	18.0521		373.723	14.8093		371.146	28.6586	13.8393		371.727	16.3875	15.6347	64.8542	5.4398	67.7097		373.364	14.7611		374.186	16.3846	10.281		370.214	31.9895	28.0826
240.186	54.3788		288.324	12.9283	35.1866		240.185	14.742	11.9909	9.36434	3.74648	32.2308	10.3492	6.4178	9.00055	16.2311	45.4857	43.6388	10.5003		375.399	14.393		372.81	24.9391	28.6241		373.395	15.2652	16.947	65.2687	5.04964	71.56		375.038	22.3716		375.864	30.9995	9.02039		371.874	30.9898	22.6519
241.261	52.7685		289.612	11.0694	35.9062		241.261	15.443	13.1635	9.28911	4.3485	35.7438	14.0624	8.55342	5.09636	13.8936	48.0271	40.5122	13.6971		377.075	15.4667		374.474	20.2615	10.0232		375.062	18.2357	20.7011	57.3683	7.66341	71.3519		376.712	18.0605		377.542	19.2168	11.0573		373.535	21.3204	39.029
242.33	51.2885		290.904	7.51927	38.2003		242.329	9.84863	14.6844	6.98707	5.48222	24.564	10.4728	9.1353	5.7071	12.1752	46.9382	34.424	14.441		378.751	14.1955		376.14	31.9431	20.12		376.729	22.2935	20.5083	53.7235	7.02435	47.0101		378.386	26.7217		379.219	22.1986	8.65926		375.195	12.446	41.9899
243.406	46.5274		292.185	10.5677	34.1445		243.405	12.2461	12.0862	11.2815	6.11993	34.4239	9.68779	6.07806	6.8685	13.8675	48.2036	33.8072	13.8165		380.426	14.4811		377.803	41.3782	19.8788		378.396	23.9005	20.5753	56.7566	7.82722	70.0296		380.061	29.132		380.898	16.1516	11.2331		376.854	21.483	42.2624
244.473	40.1276		293.477	9.44176	30.4894		244.473	8.45781	12.5928	9.53699	1.58255	31.4312	7.62025	5.93729	4.55682	13.1636	47.2922	40.0065	12.1204		382.102	14.6981		379.467	59.3239	24.3468		380.063	26.044	21.1278	49.7562	8.79819	80.1617		381.735	23.6338		382.576	24.2272	10.4045		378.515	15.7916	37.1259
245.549	35.7092		294.761	8.20165	23.903		245.549	11.4724	10.5931	9.5195	4.00818	30.7032	14.451	10.0994	9.19662	13.2838	43.955	34.8929	11.0493		383.779	15.7668		381.132	72.1773	14.6851		381.73	21.9282	18.7952	45.8378	2.48636	75.1078		383.409	26.9235		384.254	10.9132	10.2875		380.175	0.211638	32.314
246.618	33.2728		296.053	13.2775	27.0149		246.617	10.2558	11.1679	5.63296	5.6703	22.9038	9.9198	9.30459	6.01793	12.2255	45.737	29.7611	17.5091		385.455	15.7726		382.796	67.4884	13.3562		383.397	23.8337	20.2531	39.9934	10.5445	77.5368		385.084	33.1258		385.931	12.7583	7.6359		381.836	15.0568	40.3045
247.694	29.8453		297.345	16.4363	26.7155		247.693	12.5895	9.50906	10.0616	3.04375	28.2876	14.945	10.8112	7.37747	17.3423	47.0575	23.6421	17.6292		387.13	16.0971		384.461	68.8227	19.6867		385.064	24.7386	20.9948	33.0236	3.62518	84.5591		386.758	23.3939		387.609	19.3779	14.5878		383.496	9.28416	36.5818
248.77	30.2094		298.624	16.8746	28.9364		248.769	8.1881	10.7324	7.52454	5.97131	23.5546	11.929	11.2721	4.94502	16.9475	45.1919	25.2052	14.9823		388.806	15.7508		386.126	62.7236	14.3734		386.731	26.3748	17.1654	25.3248	8.94307	79.6455		388.431	29.5723		389.286	22.5989	12.1077		385.156	21.5041	37.815
249.837	27.0613		299.913	14.865	34.5476		249.837	13.3128	9.48294	7.59191	5.43951	20.5579	13.7945	10.46	8.33593	13.9976	45.6619	17.8183	20.9098		390.481	16.053		387.789	56.4887	22.1726		388.397	27.9557	22.2033	21.2074	6.81208	63.5398		390.106	22.3666		390.965	26.1948	9.19957		386.815	6.46852	39.9375
250.914	23.4834		301.204	11.1505	23.4953		250.913	11.1544	8.58739	6.18146	3.61246	30.6804	7.69674	8.43612	5.69947	17.4004	43.99	19.9869	24.0303		392.158	15.5971		389.453	35.6558	15.8919		390.064	27.4725	20.1552	20.4633	5.20108	51.8413		391.781	32.2622		392.643	19.3779	11.5325		388.475	14.4244	43.6199
251.981	20.6687		302.489	8.74734	30.8311		251.981	13.8472	11.0766	8.75313	5.71826	31.2518	6.75387	9.09781	4.2655	19.3593	41.6813	21.7293	21.7446		393.834	14.9057		391.118	42.4815	34.0091		391.731	28.6288	19.3249	15.3649	6.14083	76.8422		393.455	32.973		394.321	32.8617	9.71459		390.136	15.3429	42.5816
253.057	19.2888		303.777	14.5371	22.3176		253.057	16.1471	10.9246	10.8193	3.61884	35.98	19.0801	8.70146	4.63798	17.4834	42.1555	26.8387	21.9211		395.51	14.2641		392.782	45.5397	19.8775		393.398	28.9431	21.8582	8.72502	8.06157	74.5951		395.129	29.273		395.999	11.383	11.8254		391.797	32.6219	38.0671
254.125	15.9463		305.069	10.21	33.3642		254.125	12.2441	10.8642	8.66629	3.83201	37.3133	8.68923	11.6226	3.74566	19.5291	42.8193	17.6278	19.2229		397.186	15.4496		394.447	37.3615	8.28289		395.065	31.6275	21.306	12.3448	9.32546	64.7218		396.803	22.3502		397.677	29.6104	12.6649		393.457	22.2991	41.7521
255.201	16.788		306.352	20.1487	28.3217		255.201	15.4212	10.4616	9.53462	6.84766	24.536	10.6263	12.213	6.84566	19.5712	41.7552	26.7096	20.7481		398.862	15.2544		396.112	22.2188	13.1143		396.732	29.4737	19.1154	6.87088	6.47127	82.3247		398.477	31.0975		399.355	22.5183	10.371		395.117	38.4157	36.6933
256.27	14.1251		307.64	20.567	25.6889		256.269	12.5559	10.54	9.69265	4.70677	32.007	8.18073	7.11492	4.29228	14.5249	39.2958	22.7868	14.3823		400.536	17.856		397.775	25.0996	19.7578		398.399	36.0714	24.4312	6.70133	5.77939	70.1268		400.152	23.9075		401.033	32.8977	8.97405		396.776	29.2763	43.7422
257.345	12.1816		308.933	11.0321	16.255		257.345	20.821	10.0801	8.19435	3.48402	34.5756	8.80941	5.24326	3.917	19.1613	41.9026	18.0429	15.2721		402.213	15.0017		399.439	22.9704	23.1899		400.066	33.1402	18.1077	12.2099	10.6317	54.5174		401.826	21.875		402.711	12.008	10.3585		398.436	11.1	36.8401
258.414	13.1648		310.217	14.3647	25.4407		258.413	13.1436	10.6137	9.83059	2.87658	30.8427	12.3163	8.66683	4.87672	17.0845	41.4873	21.744	17.5005		403.889	16.0158		401.104	16.3701	29.3988		401.733	40.0991	22.0687	14.295	9.4591	37.475		403.501	22.3179		404.389	34.7623	12.4168		400.096	14.2263	38.1958
259.489	9.37697		311.509	16.6991	31.1429		259.489	11.8413	10.3412	10.1322	2.88923	40.6528	12.6236	10.2123	2.81362	14.4773	43.7003	16.289	15.559		405.565	15.5255		402.769	16.6197	15.3888		403.4	43.8061	25.1814	14.1535	5.60903	52.1285		405.175	21.3726		406.067	23.5214	11.4578		401.758	16.2403	43.3434
260.558	11.6997		312.793	16.3558	27.738		260.557	15.642	10.2117	10.1004	1.02731	35.7756	7.16775	8.91425	5.67981	17.9602	41.89	15.7154	15.3636		407.241	15.1441		404.433	21.6547	27.1742		405.067	48.7323	23.1751	8.73413	9.32626	49.6769		406.849	23.1048		407.745	22.0179	11.3225		403.418	8.73305	33.3411
261.633	9.18586		314.085	19.1852	29.0261		261.633	11.0205	9.77496	13.3398	2.80691	27.7511	8.62684	5.92892	6.30878	12.8742	40.3139	19.5897	13.5397		408.917	15.3689		406.098	10.8146	11.2318		406.734	54.0632	20.1569	6.5299	11.8663	62.1416		408.523	27.093		409.423	27.3205	12.5242		405.078	23.2176	37.7697
262.702	8.87754		315.377	19.4459	29.25		262.709	8.06302	8.00633	10.0581	3.8077	21.8014	5.73731	5.46892	3.96959	13.9599	43.9606	20.1148	11.1042		410.592	15.2116		407.761	14.7152	30.2441		408.401	59.4776	18.4341	8.37164	6.90988	59.3006		410.198	22.4706		411.101	18.6081	9.44021		406.737	29.5625	35.5257
263.777	8.2976		316.656	19.3172	26.0757		263.777	16.6077	8.85462	6.52427	4.21348	21.8377	6.95929	10.9513	5.20685	12.7401	44.7235	22.4646	16.5473		412.269	16.5264		409.425	12.3611	12.0279		410.069	61.4088	16.3817	3.57366	7.60032	57.467		411.872	22.5794		412.779	24.2632	11.6895		408.397	27.4605	36.7063
264.854	8.65718		317.944	18.086	20.767		264.853	12.4808	9.98354	10.3909	7.3373	28.0263	6.91752	6.76827	6.42736	17.426	42.8943	16.4741	12.2817		413.944	16.988		411.09	16.8254	30.4355		411.734	63.1868	12.9401	9.38511	4.23472	46.438		413.546	29.108		414.457	30.5775	9.9153		410.058	13.9758	37.2709
265.921	5.77056		319.237	15.1421	22.0589		265.921	16.6921	9.26584	11.1659	6.36372	25.2483	14.0167	4.05263	4.99492	13.1049	44.0251	21.0141	14.2397		415.62	14.0168		412.755	27.5239	14.8061		413.401	65.2223	16.1224	4.06818	5.52927	56.227		415.22	20.1886		416.135	41.8544	9.14405		411.718	26.9094	34.8243
266.998	6.38389		320.516	11.917	30.0636		266.997	13.8499	9.5023	13.6146	6.82946	26.2079	10.5145	8.55644	5.19467	15.9241	45.4762	19.645	9.83417		417.296	16.3589		414.419	20.0381	25		415.068	65.2299	14.2644	8.62415	7.19673	45.5163		416.895	25.4417		417.813	47.3404	14.0743		413.379	19.0559	30.2852
268.065	6.40808		321.808	14.6192	26.0633		268.066	13.398	10.41	11.0191	4.9253	22.1039	14.1326	7.57072	4.54585	14.7324	46.1543	11.8816	13.2497		418.972	14.6717		416.083	21.924	12.39		416.735	62.8076	14.6236	8.14788	6.92477	70.2205		418.569	24.3624		419.491	46.6565	11.9837		415.039	25.6658	31.1161
269.142	7.77129		323.1	16.9589	25.5259		269.141	11.2613	9.62756	9.2931	6.31875	25.6065	8.47776	8.47895	3.78542	15.959	46.8389	16.3885	14.5987		420.648	14.5483		417.747	15.3499	12.511		418.403	60.8063	11.2884	0.869745	6.58518	87.3268		420.243	23.617		421.168	36.2051	12.4245		416.698	7.36587	33.8171
270.209	7.67608		324.385	26.3301	28.9693		270.209	17.8955	7.82322	11.1517	6.20881	12.6392	11.3405	3.30155	4.67196	12.7	43.4095	19.4755	11.1138		422.324	18.6731		419.411	18.4799	22.1726		420.07	63.2804	14.576	8.92952	6.87405	74.4781		421.917	29.5127		422.846	39.2789	13.6051		418.358	15.7916	34.5778
271.286	5.54263		325.672	19.2265	26.6387		271.285	9.97848	9.93347	9.17195	7.46736	23.38	9.99399	5.29818	2.9909	17.098	47.2407	14.3869	12.6857		424	14.1874		421.076	24.5992	7.55984		421.736	68.9043	13.1261	7.60002	7.95625	67.7397		423.592	30.8674		424.524	22.7619	14.1004		420.019	18.0561	26.814
272.353	6.99108		326.953	21.0071	26.422		272.353	11.3357	9.67987	9.85219	4.05815	24.64	11.0255	3.11396	4.8745	12.2007	46.6732	12.3511	13.1386		425.676	15.5088		422.741	26.2279	17.3418		423.403	76.2876	14.467	11.3776	6.91417	40.0087		425.266	22.5796		426.202	34.729	13.3815		421.679	8.46808	30.3876
273.43	8.20995		328.24	18.7242	26.1626		273.429	14.5097	11.7687	9.62013	7.9695	30.0269	9.46343	0.956171	2.93286	11.4883	48.4799	16.632	9.46775		427.351	14.5432		424.405	19.4296	19.9286		425.07	71.6985	15.5472	4.8083	8.11003	41.4748		426.941	18.586		427.881	19.8282	11.5607		423.339	13.0784	33.5505
274.498	6.53458		329.528	17.323	12.5854		274.497	18.0392	7.5758	10.9256	4.85876	20.7096	13.1702	4.41605	4.10415	16.257	46.326	19.2366	3.74505		429.028	15.4463		426.069	20.8341	19.0329		426.737	61.2507	13.7513	6.78278	10.4456	37.6248		428.614	29.8682		429.558	6.98645	12.0214		425	31.9895	30.3709
275.574	6.30782		330.812	18.7224	19.2738		275.573	12.9367	12.1035	11.3344	4.13033	29.4915	10.5794	3.40824	1.1371	14.0488	47.1295	13.7984	12.4776		430.703	15.9751		427.733	14.0353	24.2557		428.404	52.6026	16.9871	5.19696	16.0744	34.0721		430.289	23.0882		431.236	20.3477	11.0162		426.659	23.1363	38.2244
276.641	5.411		332.105	24.7514	19.1008		276.641	11.3813	7.95427	7.8504	7.22023	30.1787	7.60814	6.5049	3.12246	8.11155	48.6013	14.4058	12.2998		432.379	13.8876		429.397	9.33917	17.4615		430.072	48.4927	14.8294	8.23928	19.1408	38.7166		431.963	29.3703		432.914	13.9449	8.35805		428.319	10.8139	33.2974
277.718	6.36104		333.392	23.1186	10.9926		277.717	12.3691	9.41608	11.5438	5.95128	30.4265	15.6835	4.23827	5.69995	12.5453	49.5244	13.1341	10.1202		434.055	14.3163		431.062	17.8004	20.8947		431.738	37.5215	14.1296	3.5167	22.6676	38.4264		433.637	24.2259		434.592	12.8389	9.77175		429.98	14.4456	37.322
278.793	6.80843		334.672	17.7982	12.2849		278.793	15.8771	10.1358	14.1134	4.97336	28.0488	12.6549	4.72056	3.52049	9.36869	50.2687	14.4642	11.2208		435.731	14.6101		432.727	11.8163	27.3662		433.405	30.0348	16.3572	7.61396	26.534	31.2208		435.312	24.9723		436.27	19.2443	11.915		431.64	22.2847	36.4886
279.862	5.25679		335.96	20.3835	8.83897		279.861	11.0761	10.7463	6.83936	7.00597	34.8407	17.0514	6.34473	5.99452	9.46793	51.7399	17.8763	16.5235		437.407	14.1535		434.391	17.569	13.3562		435.072	22.599	15.098	5.85259	37.4564	40.3389		436.987	14.4893		437.949	18.4247	8.94106		433.3	20.5044	36.2421
280.937	5.53012		337.253	17.7966	6.28129		280.937	13.2223	10.79	6.85113	4.37402	28.0817	12.5777	4.92572	3.07224	11.8491	52.8079	4.45545	12.8983		439.084	14.3918		436.055	9.97428	9.85306		436.738	21.8478	15.3445	3.72478	26.1686	51.1141		438.66	14.0066		439.626	13.7812	14.7359		434.96	11.9974	34.1484
282.005	4.95836		338.537	12.7867	13.7291		282.005	17.1963	8.85548	16.6	5.08753	40.8001	16.0645	3.32923	5.77875	7.84566	50.8192	11.9289	11.6582		440.758	15.4246		437.719	17.7746	24.3468		438.406	14.4838	17.5963	13.8821	19.8058	47.7291		440.334	18.0743		441.304	11.0855	11.9732		436.62	25.3797	42.3196
283.081	5.91191		339.825	16.5963	14.0334		283.081	11.9073	11.5111	16.4488	9.07333	35.579	13.2228	7.77066	5.37615	7.96453	53.7412	9.03981	13.7108		442.434	16.9317		439.384	15.6451	22.8769		440.073	13.601	22.1782	9.62626	14.3333	46.0126		442.009	13.0353		442.982	13.8033	12.3699		438.281	22.4684	37.4949
284.149	7.8311		341.117	8.20996	11.888		284.149	17.995	11.8831	10.2643	8.09469	31.1966	16.2456	8.7706	4.57105	10.9911	54.7853	4.91376	15.9723		444.11	18.3586		441.048	22.6499	26.6924		441.739	7.05866	21.7708	11.0533	14.2096	38.9258		443.683	26.7718		444.66	27.5263	13.9379		439.941	15.9753	56.155
285.226	6.39142		342.397	17.3146	16.2034		285.225	13.3123	9.72041	10.2986	5.40129	31.7919	18.219	1.83624	5.27005	11.0842	55.605	14.0044	12.0494		445.786	20.7736		442.713	14.8309	28.4533		443.406	5.63344	26.0321	12.3486	13.598	39.0875		445.357	17.2984		446.338	20.0338	12.1982		441.601	16.8727	60.7555
286.294	5.98572		343.684	16.5912	20.7331		286.293	7.60703	8.45153	7.56202	8.01886	18.4945	19.4438	6.71394	6.74519	4.91934	55.888	6.19066	11.815		447.462	25.6833		444.377	18.7945	13.2359		445.073	7.76801	22.0723	11.6283	8.48982	42.9477		447.032	13.7673		448.017	25.0999	12.4636		443.261	20.8506	68.4101
287.37	6.35184		344.964	16.874	16.968		287.369	12.7905	7.68604	11.2432	6.92919	25.0756	8.18106	7.30442	6.14839	7.70355	53.7433	13.3558	10.7748		449.139	29.5136		446.041	10.0904	24.9502		446.741	3.1668	25.9592	17.2056	9.68487	31.8753		448.706	13.1549		449.694	27.8676	12.6479		444.921	20.3207	80.6911
288.437	3.87029		346.257	12.7474	19.606		288.437	13.0043	9.61033	10.7217	7.89132	25.7699	13.8785	11.8182	7.38086	6.85982	57.1289	5.85428	16.5522		450.814	35.9658		447.706	16.9153	23.6018		448.408	3.6346	20.5052	21.7959	12.2909	30.423		450.38	22.4993		451.372	28.5457	9.32184		446.581	37.8502	87.0193
289.513	4.0214		347.549	10.7991	14.4919		289.513	12.7531	11.4482	9.15507	6.72287	32.7126	14.6928	7.66228	7.17559	6.92498	52.3227	12.5446	14.7879		452.49	46.8933		449.37	18.8388	21.2563		450.075	4.32474	23.0675	20.3221	9.0403	20.6026		452.054	17.8644		453.05	18.6972	13.1424		448.242	9.15892	89.4295
290.582	3.30067		348.832	16.145	17.0901		290.581	10.928	9.54096	9.43006	8.00721	25.7521	17.2922	9.4902	7.04628	4.9723	55.5361	21.5104	14.1939		454.166	68.2489		451.034	20.7445	22.948		451.741	2.56639	19.7541	26.3078	2.15939	19.1679		453.728	19.1102		454.728	18.8721	14.0611		449.902	17.6887	98.2715
291.658	4.41125		350.12	19.6529	25.2119		291.657	10.4297	7.86073	10.8347	4.58686	31.6934	20.2371	12.2776	7.43201	3.72063	53.3527	17.7598	11.4891		455.841	82.6515		452.699	17.7746	21.4483		453.408	2.29154	17.2294	28.758	4.87872	25.1911		455.404	17.888		456.406	13.4588	17.1663		451.562	29.9087	100
292.726	5.5362		351.408	19.7374	22.6828		292.725	12.9821	9.73911	8.62844	6.20807	28.7107	18.1311	11.4533	7.71009	7.34928	56.2189	15.2705	11.9817		457.518	95.6528		454.363	13.2208	28.5031		455.075	1.72555	16.5856	39.0665	7.9196	18.4009		457.078	21.0339		458.084	11.3412	14.1767		453.222	26.7468	96.6991
293.802	5.8536		352.688	18.3032	15.4336		293.801	11.5331	8.5137	6.3938	9.51873	30.894	15.6979	5.69307	6.67742	6.60634	53.979	15.5261	14.5967		459.194	100		456.027	16.7806	31.0395		456.743	3.87884	13.2468	51.9002	8.6436	19.4515		458.751	12.4389		459.761	14.8648	14.137		454.882	12.8279	81.1808
294.878	7.23189		353.976	19.5156	15.9888		294.877	7.76986	9.62355	11.3597	5.88584	25.7097	16.8465	11.3577	7.848	8.07994	55.2147	13.2608	17.9584		460.869	96.7496		457.69	12.9058	11.7654		458.41	4.47799	15.065	63.437	7.52573	24.0205		460.426	23.9891		461.439	15.518	17.0769		456.542	30.3574	75.5179
295.946	4.15592		355.268	18.3276	18.905		295.945	12.4738	9.79155	12.0984	6.48275	28.6535	14.408	10.8996	10.5426	5.69148	55.3543	16.9626	12.4939		462.545	92.0935		459.356	10.8598	17.2707		460.076	1.60964	9.05832	79.4539	6.74979	19.315		462.1	8.51031		463.117	8.9542	16.2336		458.202	27.8279	63.249
297.022	4.14267		356.549	19.7905	17.1518		297.021	13.9842	8.07929	8.26802	10.8772	36.2453	20.9956	11.1856	7.69139	3.2546	50.2023	19.8946	17.535		464.221	88.3149		461.02	14.4196	15.2679		461.742	2.89086	14.3337	83.741	8.92552	21.816		463.774	18.5418		464.796	20.9118	17.7278		459.862	24.8286	56.3834
298.089	2.49506		357.836	21.7011	20.5477		298.09	16.309	8.70003	9.74857	11.3042	28.2823	12.4536	13.1223	8.83888	6.086	53.6577	7.48099	10.4273		465.897	79.1515		462.684	10.8594	20.2895		463.409	2.56747	18.9395	83.1957	11.6259	12.6682		465.449	17.0401		466.474	29.8962	17.0203		461.523	24.0336	46.9263
299.165	7.32849		359.128	19.7875	18.9462		299.165	11.8842	10.0383	11.5104	10.7532	38.8182	11.5674	11.2659	8.6021	6.55903	53.4287	10.9917	14.3392		467.574	68.3676		464.349	19.5005	29.953		465.076	3.63992	19.1625	83.0957	12.4337	23.9099		467.124	8.29759		468.152	24.6498	17.1621		463.183	23.3801	41.9694
300.234	6.79495		360.408	17.105	18.6857		300.233	14.8967	8.94248	11.0405	8.67209	36.1909	9.10526	10.4911	5.59822	8.29893	51.9278	12.4664	11.3502		469.249	67.787		466.013	13.445	11.5448		466.744	2.18942	10.0614	71.1044	8.20759	14.703		468.797	7.38573		469.829	19.8504	15.9556		464.843	22.7477	41.3266
301.309	4.93676		361.697	24.0391	22.6647		301.309	15.0072	9.4575	7.1412	9.87749	34.335	10.9289	10.2157	6.77962	9.87562	48.3326	11.1526	17.0596		470.924	62.9017		467.676	14.5358	31.714		468.411	2.82518	15.0266	73.313	9.95392	18.8927		470.471	13.2591		471.507	21.5067	15.9957		466.503	25.2984	28.2018
302.378	5.99501		362.976	24.4874	24.1375		302.377	11.2321	8.24813	7.93352	13.9631	36.4221	12.0277	12.2165	8.2197	7.51387	50.5544	6.85368	10.9395		472.6	59.4681		469.342	14.6249	27.2447		470.078	3.54405	11.0035	68.8862	3.50012	16.0879		472.145	21.23		473.185	9.67628	17.9223		468.163	26.012	31.6602
303.454	6.77172		364.265	28.0946	22.4046		303.453	12.4362	7.54701	12.9486	13.4403	36.4221	10.9859	3.97697	5.33034	9.62787	50.4597	13.361	12.6199		474.277	56.2267		471.006	8.82018	22.776		471.744	4.25662	12.3972	50.4884	7.80425	20.4853		473.821	24.5363		474.864	7.10055	18.0097		469.823	28.644	26.7208
304.522	7.06228		365.553	22.3224	26.0686		304.521	14.6113	9.59764	10.9993	11.2424	31.9811	9.0669	9.17419	5.85933	8.13749	51.7381	13.4053	15.2287		475.953	53.7279		472.67	17.05	14.323		473.411	2.03832	10.1032	60.6606	10.8724	19.1248		475.495	24.8213		476.542	22.004	16.1332		471.483	20.137	30.9127
305.598	10.1223		366.832	23.389	21.5193		305.597	13.511	12.3131	9.75388	13.7365	24.2523	8.8972	4.40689	7.27829	11.0989	50.5022	8.58355	21.7201		477.629	48.7671		474.335	22.1672	20.1187		475.079	5.29327	14.6251	56.1718	9.66707	19.389		477.169	21.1442		478.22	37.9415	16.0422		473.144	19.5046	32.7101
306.666	5.35946		368.12	19.8164	28.2479		306.665	18.0246	9.26983	12.4318	12.4326	31.7097	3.28959	8.15865	6.14534	9.58804	48.7862	11.0385	22.7356		479.305	42.4037		475.999	13.8994	4.7099		476.746	4.13963	18.502	57.6537	5.44489	25.8841		478.842	18.3505		479.897	18.7555	17.118		474.804	22.0341	35.5921
307.741	5.59441		369.408	22.7477	26.2038		307.741	12.8872	8.60426	10.9921	13.6037	31.4506	6.41215	5.85852	5.67597	9.60847	53.7158	13.9064	14.8688		480.98	38.8304		477.663	22.9249	16.7882		478.413	2.90883	14.8764	43.7444	9.80905	21.0033		480.517	26.3818		481.575	17.7189	17.8511		476.464	16.0777	27.3481
308.809	4.07304		370.688	24.2197	26.8686		308.809	10.6888	8.24562	9.4212	11.9369	29.9095	2.64414	7.28475	4.96953	9.17976	52.1139	13.1005	17.0392		482.655	35.8622		479.328	21.674	20.532		480.08	5.43452	12.8058	39.9578	11.6455	12.4902		482.191	19.8583		483.253	17.352	20.9422		478.124	0	36.1855
309.885	3.7525		371.976	19.6078	23.2023		309.885	10.5864	9.45067	8.42487	14.567	30.8194	6.82276	5.19762	6.2397	5.7164	55.8675	6.69956	16.7335		484.332	28.3057		480.992	23.258	12.7522		481.746	4.99452	17.7818	30.9758	11.1879	18.0666		483.866	27.3329		484.932	22.2013	20.9509		479.784	35.7838	35.3982
310.962	8.36715		373.268	18.2682	26.1579		310.961	13.6135	7.99233	14.1067	12.085	41.0308	7.58945	10.0444	8.40805	7.26592	55.8557	15.2727	17.6144		486.008	26.8841		482.656	15.1625	13.5962		483.413	6.72082	12.4612	23.5483	9.8647	20.866		485.541	28.9579		486.61	16.3961	24.7383		481.444	16.5052	29.7554
312.03	5.97246		374.548	20.9653	26.2497		312.029	13.525	8.06663	9.29487	10.6469	39.9732	3.85029	4.54139	6.9064	7.67568	55.0235	4.35374	22.1553		487.684	23.3125		484.321	15.6189	14.1808		485.08	6.70249	6.12132	17.0574	4.8936	14.4933		487.215	41.9101		488.288	22.5068	26.8521		483.104	20.0557	33.0768
313.106	4.0165		375.84	12.8136	26.1546		313.105	10.7707	9.80063	11.8659	10.2804	37.5178	12.4762	8.37013	6.94753	6.04155	57.1885	16.0926	17.4385		489.36	20.6114		485.986	22.7208	21.9326		486.747	4.36706	14.9857	17.7573	9.35499	13.9791		488.888	48.7794		489.964	15.7042	24.7796		484.765	16.8727	29.1304
314.174	3.55358		377.124	17.2997	24.6906		314.173	12.6212	9.82406	12.0759	15.3604	30.9412	5.58243	6.5764	6.67469	11.2547	58.2944	6.60269	17.0303		491.035	19.125		487.649	15.556	26.38		488.414	8.0009	17.4886	14.6279	2.52851	27.7783		490.562	53.3673		491.642	27.2866	20.9358		486.425	19.7696	26.8378
315.25	5.43464		378.416	18.1061	22.6352		315.249	16.809	10.3956	10.1882	9.94579	33.1343	11.1843	10.348	5.76475	7.21851	56.8393	14.0287	15.785		492.711	17.218		489.314	15.9213	26.3296		490.081	3.48028	15.6617	10.7425	12.9498	14.7967		492.238	78.2053		493.321	21.6344	31.3618		488.085	18.2983	30.2291
316.317	6.78301		379.704	22.608	32.7835		316.317	12.9972	12.286	6.86426	10.5166	27.7599	10.1122	10.0139	6.20759	4.96552	59.1873	0	15.2922		494.388	16.1122		490.978	22.4692	19.1532		491.747	3.34008	15.7886	13.3221	9.46541	14.2478		493.912	65.9067		494.999	35.246	35.7706		489.745	38.7019	29.9626
317.393	6.12748		380.984	20.652	23.3219		317.393	9.69018	8.01509	8.81645	14.1024	31.2693	9.69322	8.63998	8.36848	9.42192	60.675	10.5042	12.9345		496.063	11.4154		492.642	16.9415	36.8371		493.415	5.64908	16.991	12.2651	10.9412	17.2062		495.586	76.4469		496.677	28.9656	28.2198		491.405	21.8504	30.7434
318.462	3.83073		382.277	16.4441	32.4721		318.461	16.1631	8.92804	7.77277	12.4881	18.7759	12.9505	6.31676	7.75369	7.27616	60.6456	11.5398	10.1175		497.739	12.4202		494.307	13.1498	26.3994		495.082	4.7601	14.939	9.76965	11.6392	9.81572		497.26	64.7917		498.355	20.237	32.0501		493.065	21.7691	28.4187
319.538	3.04269		383.569	23.6289	32.2748		319.537	10.3695	7.89647	13.7248	13.3302	25.3336	9.7501	9.89076	8.57274	10.982	58.427	11.2686	18.4031		499.415	11.7915		495.972	9.27583	22.8264		496.749	5.48183	21.4898	14.4186	13.164	19.9874		498.934	56.536		500.032	32.3309	31.5735		494.726	29.3788	27.8338
320.606	3.48696		384.853	17.9871	31.3039		320.605	10.4564	10.0735	13.0176	14.6232	27.0619	6.3777	7.25963	8.0984	6.53602	56.7379	16.5755	23.7613		501.09	11.7328		497.635	14.991	28.2115		498.416	5.61643	16.5013	6.61976	10.0414	18.5724		500.608	38.3862		501.71	29.733	41.9784		496.386	7.18216	28.8278
321.681	5.25413		386.14	20.9754	35.1419		321.681	14.0116	10.3814	6.9075	11.4621	28.6626	12.084	9.1872	10.2371	10.386	55.5219	14.2319	17.9651		502.766	10.8099		499.299	14.76	18.7206		500.083	6.89459	14.818	9.94315	8.65824	16.0814		502.283	25.7722		503.389	35.2793	38.8546		498.046	32.7244	29.9483
322.749	4.66672		387.428	23.9623	32.7796		322.749	18.4709	10.1209	10.0279	13.0023	30.7185	8.5361	10.2046	10.137	9.77054	53.5305	17.4022	27.3728		504.443	10.1743		500.964	14.7414	27.8293		501.749	7.35038	16.5416	14.1647	9.00819	18.6174		503.957	26.1741		505.067	52.023	42.9171		499.706	30.4598	29.3636
323.825	7.06237		388.708	26.1279	33.4049		323.825	12.3176	7.99654	11.0703	15.3798	34.0072	12.7709	7.78631	9.50671	10.3791	55.0489	10.1159	22.7997		506.119	9.6392		502.628	14.8309	28.9364		503.417	11.8904	16.8851	9.30437	13.6632	15.4879		505.632	18.7331		506.745	61.1603	45.5096		501.366	21.6667	31.797
324.893	5.92091		389.996	23.2238	27.4164		324.893	18.9979	8.83637	6.9856	14.8067	34.0749	7.84264	7.04041	8.49801	5.2546	57.2086	8.38693	18.4903		507.795	8.64293		504.292	13.5345	12.3694		505.084	11.538	10.659	9.12175	11.4409	18.9834		507.306	16.5503		508.423	77.2819	50.4264		503.026	17.4238	29.1875
325.969	1.7598		391.289	18.2253	32.9938		325.969	13.1689	7.93962	10.3936	15.0922	35.4882	7.82134	0.959848	7.07649	10.2219	53.6608	10.055	16.5147		509.47	9.82432		505.958	13.9454	22.5852		506.751	11.5316	16.3786	5.50009	6.94774	23.1235		508.979	29.1033		510.1	77.6875	50.3164		504.687	14.3432	28.3365
327.046	5.49383		392.569	16.6672	30.6134		327.045	15.214	7.41049	8.67079	13.9053	33.6781	5.04622	5.97013	9.00046	6.95129	53.5713	12.0768	15.8993		511.145	10.1885		507.621	11.2707	25.0711		508.418	9.58356	19.4719	7.05783	11.0466	18.7623		510.654	16.7884		511.779	76.8396	54.3926		506.346	26.3794	29.5625
328.114	3.79079		393.856	21.3727	35.4241		328.113	13.5358	9.77494	8.5195	17.5761	29.2747	10.7443	7.73171	9.4163	9.57716	54.7399	12.0266	18.1217		512.822	8.76742		509.285	13.6954	25.7961		510.084	8.44583	19.9413	5.10366	6.48649	15.5786		512.329	18.87		513.457	83.9231	59.6651		508.007	8.81432	20.6757
329.189	4.70714		395.14	13.527	24.7076		329.189	9.66183	8.97195	11.1956	16.0835	27.9476	12.3977	7.09616	9.46412	7.81357	53.9029	10.0425	24.2851		514.498	10.935		510.95	13.9898	19.203		511.75	10.2119	20.0562	8.64636	6.55905	20.403		514.003	24.3113		515.135	59.5458	59.409		509.667	20.953	27.6589
330.258	4.43696		396.432	16.342	31.1881		330.257	15.4612	10.9634	11.4392	18.483	19.5315	5.34622	10.2104	10.8627	9.42774	54.5841	15.7215	19.6175		516.174	10.2358		512.614	16.7548	14.2021		513.418	11.4069	17.3007	9.90114	14.9617	23.3164		515.677	29.4957		516.813	81.5583	66.8879		511.327	16.6077	26.7291
331.334	5.86122		397.721	21.763	29.7339		331.333	13.5978	10.3649	8.57452	18.2165	34.0768	11.0833	9.65023	11.2837	11.1422	54.2664	7.85304	15.3744		517.85	9.30888		514.279	11.611	20.2202		515.085	8.07724	24.7577	6.53007	16.8656	19.0509		517.352	20.5481		518.491	56.8863	70.708		512.987	26.5631	25.927
332.401	6.43784		399	20.1631	30.8136		332.401	15.7744	10.0626	8.1312	21.1231	30.0812	13.8815	10.3912	11.1836	8.23801	56.5831	13.4111	17.521		519.526	7.59035		515.944	16.3762	23.9135		516.752	4.97691	22.6006	8.81625	7.65799	20.0911		519.025	20.6733		520.168	57.2449	72.4107		514.648	9.18172	27.921
333.477	6.51622		400.292	21.812	37.0203		333.477	11.5316	11.2939	8.74183	16.4735	33.1884	7.36079	6.07897	9.88841	9.51567	58.4418	12.8416	16.5902		521.201	9.26211		517.607	15.0548	18.187		518.419	10.8803	25.2013	5.90543	11.7424	22.7724		520.7	16.3928		521.847	55.8774	83.0564		516.307	31.4384	27.0482
334.545	2.68075		401.585	18.9689	30.2683		334.545	15.6878	9.36193	13.5359	16.71	31.4632	11.3648	11.8622	11.0474	11.2791	55.4629	8.72211	24.6168		522.878	9.17673		519.271	22.5338	31.4016		520.086	10.2999	20.525	7.44183	8.93247	14.8612		522.374	22.2241		523.525	43.2913	85.5496		517.967	30.7248	27.0733
335.621	8.85943		402.869	22.7692	31.6112		335.621	10.7641	9.84696	12.73	19.1749	25.9345	10.6967	12.3971	12.5173	7.75674	56.1738	14.6618	23.5915		524.553	10.4536		520.936	21.1554	27.6585		521.753	9.96993	22.9393	13.8065	9.291	22.525		524.049	27.6882		525.202	35.5964	84.9324		519.628	21.218	31.9638
336.689	6.38472		404.16	23.2174	30.6579		336.689	11.5777	7.9982	12.1266	21.1906	21.8528	13.4309	6.50202	12.0942	9.26267	54.8459	14.6302	26.1734		526.229	8.18153		522.601	22.8611	14.927		523.42	7.74087	25.8695	7.80536	5.63047	26.9404		525.723	21.2464		526.88	37.2247	84.6023		521.288	25.4821	24.677
337.766	4.98146		405.453	18.345	28.2783		337.765	14.9873	11.2291	8.48087	15.5838	28.1753	6.5816	5.35125	10.8739	9.04468	54.326	10.9121	36.0715		527.905	8.31772		524.265	31.4882	26.4007		525.087	9.17424	21.6238	11.0731	10.0941	15.1711		527.396	24.8416		528.558	21.4123	91.0963		522.949	27.9303	28.0915
338.834	6.59225		406.732	21.9623	28.0158		338.833	16.643	10.4601	14.6514	22.0111	21.2203	12.2849	6.76243	10.5929	8.00538	52.4048	19.0548	32.9983		529.581	7.30219		525.93	52.0319	32.1977		526.754	6.88964	26.29	8.45305	7.31549	30.4111		529.07	22.3401		530.235	37.4639	88.8877		524.609	32.8056	25.9508
339.91	6.40742		408.02	20.0734	30.5572		339.91	15.4374	8.68632	15.0239	18.4563	21.3563	11.3094	10.7507	9.90855	8.58314	54.2247	16.0381	34.7184		531.257	7.73311		527.593	64.4483	19.0827		528.421	9.70174	25.8432	9.83404	13.8376	20.4986		530.746	21.2468		531.914	29.488	90.3331		526.268	35.9675	32.5029
340.978	6.92182		409.313	20.762	33.3087		340.977	7.21355	11.8763	9.06752	20.623	28.7953	7.143	7.94361	11.9404	6.95575	53.5562	9.94	39.6811		532.933	7.10287		529.257	74.5249	33.6463		530.089	8.47604	33.4492	9.58857	11.8979	23.4567		532.42	2.76657		533.592	29.3379	94.6844		527.928	15.6079	28.4079
342.053	3.73962		410.596	21.421	30.8862		342.053	11.5726	9.20774	12.1068	20.8738	28.5043	9.50515	9.14182	13.9517	11.4677	51.4221	18.459	57.9058		534.609	8.12665		530.922	87.43	31.4727		531.755	8.20625	34.9304	13.7805	15.9868	21.2076		534.094	21.455		535.27	21.9208	98.1552		529.588	43.2098	30.3078
343.129	6.86497		411.885	20.4199	29.7607		343.129	14.7805	9.54723	8.94763	21.8832	25.5874	11.5091	11.4474	12.7161	8.53383	52.4429	17.7945	77.7022		536.285	7.17514		532.587	82.8303	18.0661		533.421	7.56693	27.0411	5.11917	10.0021	24.7248		535.768	26.9241		536.948	35.2185	100		531.249	13.0784	31.9626
344.197	6.29555		413.169	19.8751	24.4468		344.197	16.9377	10.7881	9.12352	19.6485	32.965	9.95431	5.21111	13.9212	11.4245	51.904	20.1233	80.0191		537.96	7.60946		534.251	94.8251	24.1056		535.088	6.6048	28.062	11.2176	10.4961	24.2892		537.442	25.6802		538.626	32.5588	90.7018		532.91	22.2974	28.1126
345.274	6.47361		414.461	15.9887	25.6925		345.273	13.6702	8.94365	9.66555	17.4163	35.6452	13.4284	13.8695	15.42	14.1331	52.9889	21.1452	77.5627		539.637	7.20442		535.916	100	16.9583		536.755	8.22946	25.172	6.17532	7.48561	21.4977		539.117	18.5156		540.304	22.1293	95.3862		534.57	27.607	25.7136
346.342	4.8773		415.748	14.9217	23.8722		346.341	14.8159	11.9144	11.2241	20.8791	36.0517	13.327	11.0073	11.6101	10.9792	48.0672	13.8335	64.2428		541.312	8.55729		537.579	84.0875	16.838		538.422	7.31876	20.2883	7.86489	6.96894	22.2479		540.791	27.1165		541.982	36.38	96.1311		536.229	48.7386	24.9746
347.418	5.42782		417.028	17.1847	24.0443		347.417	17.5165	7.25122	7.98903	21.5108	32.9801	7.65754	11.5629	15.1853	11.2592	53.0869	28.31	68.3793		542.988	8.15491		539.243	85.7175	26.6419		540.09	10.5705	20.8184	10.4587	7.86395	23.3377		542.466	24.4505		543.66	23.2129	94.5459		537.889	61.3844	24.1186
348.486	4.8523		418.32	11.1212	24.4657		348.485	14.2935	10.0569	8.68368	21.5321	26.5969	11.8536	10.1873	12.521	10.8285	51.5262	12.7842	58.6618		544.664	8.20271		540.907	72.9277	24.3468		541.756	12.5302	21.5729	11.6129	16.4339	31.5822		544.14	34.5898		545.338	22.8906	95.3158		539.549	73.8466	28.3115
349.562	4.52683		419.609	14.0302	26.8988		349.561	11.0784	10.4481	4.4505	22.7477	27.597	6.01214	9.61552	14.3722	9.65863	52.5017	12.3155	49.6464		546.34	8.47145		542.573	58.0271	18.4276		543.423	10.7229	24.1406	8.33204	8.34123	24.9719		545.814	37.0867		547.016	25.1831	91.9483		541.21	85.0084	25.3368
350.63	6.27014		420.892	14.0974	24.6423		350.629	14.812	12.4567	10.9651	31.4994	26.7377	9.61288	11.8669	12.8864	10.1871	54.4826	9.83395	55.5891		548.016	9.63271		544.237	75.0891	21.8105		545.09	9.77679	23.9004	10.5685	15.4588	24.1722		547.487	20.4385		548.694	21.1286	91.1881		542.871	56.1417	25.6399
351.705	4.99946		422.185	10.1554	35.5915		351.705	16.1326	9.98883	8.52873	29.6732	26.336	4.2672	10.6793	11.1698	11.2544	50.4471	13.6998	42.3443		549.693	7.86946		545.901	63.9681	31.1106		546.757	8.65475	21.5718	9.21385	25.0279	21.0971		549.163	21.2649		550.372	16.1097	89.3326		544.531	52.1866	29.9243
352.773	4.65443		423.476	13.6726	27.659		352.773	18.0466	12.0527	6.65102	35.0697	25.0898	4.29036	7.01701	13.0696	7.90385	51.846	9.38516	40.6262		551.367	8.02977		547.565	62.5312	16.9803		548.424	8.20148	22.269	4.52551	33.9644	19.9741		550.837	24.1124		552.05	21.6955	88.7947		546.19	53.7163	22.3661
353.849	6.07132		424.756	15.8092	24.5983		353.849	8.54201	12.035	10.2171	39.2897	28.0302	8.70323	9.69191	10.5963	9.26113	51.9995	21.1714	33.9341		553.043	8.35221		549.229	63.089	21.5692		550.092	7.49783	23.8822	8.56512	47.8538	26.6453		552.511	28.8086		553.728	17.341	86.9013		547.85	35.7025	26.9355
354.917	2.37743		426.044	14.3006	24.5333		354.917	13.9502	11.6759	7.28164	39.6997	25.4099	7.82064	11.1897	10.9197	13.9095	50.709	19.1072	29.4894		554.719	9.12749		550.894	55.5838	7.67951		551.758	8.24621	24.9034	9.12349	40.2354	31.5475		554.185	31.0771		555.406	28.1343	81.3422		549.51	30.3574	27.1875
355.994	6.88736		427.329	14.2608	26.4632		355.993	10.3823	14.0314	8.50049	43.5289	32.9203	7.41164	4.61952	11.7495	12.9879	49.9222	13.045	33.9848		556.395	10.0582		552.559	86.2175	14.8061		553.425	8.93965	19.9009	11.1176	46.8659	27.7748		555.86	20.7952		557.084	6.4001	75.1817		551.171	26.012	32.2208
357.062	3.11607		428.62	15.822	29.4349		357.061	13.5984	11.5064	10.7303	50.915	34.7761	5.95309	5.87926	10.2769	15.8161	49.1746	11.2607	27.4496		558.071	9.31027		554.223	81.7717	6.03885		555.092	7.77277	16.5349	6.57088	42.0643	31.8837		557.533	14.0082		558.763	17.3384	79.8285		552.831	31.4596	24.3783
358.137	3.33724		429.912	15.8646	32.9486		358.137	17.7796	12.1189	8.58054	53.6669	25.5387	6.4673	8.45039	9.60061	12.0201	49.0099	13.3787	22.0976		559.748	9.25848		555.887	70.4131	16.5464		556.759	8.72944	20.3881	11.0847	34.6287	34.0702		559.208	25.7234		560.439	14.648	73.7933		554.492	21.306	25.4305
359.213	3.72345		431.197	10.489	32.2675		359.213	14.6489	11.5769	5.14374	56.9135	36.3428	15.4138	7.93843	9.57492	13.2635	47.6294	27.101	20.1673		561.423	8.81405		557.551	53.2308	31.24		558.426	10.5234	18.3668	13.8585	26.0115	28.756		560.882	19.3841		562.117	16.4433	70.6555		556.151	11.8137	33.1527
360.281	7.92849		432.484	14.4306	34.2798		360.281	13.5069	10.6532	6.95696	59.2517	35.0629	3.68394	7.5561	9.27986	11.369	49.8803	21.8597	21.886		563.099	7.44771		559.216	38.3297	5.14253		560.093	11.1047	17.1203	10.61	32.1245	37.5574		562.557	15.7952		563.795	35.2015	59.2894		557.811	17.9749	27.947
361.357	5.83419		433.772	8.96602	35.96		361.357	10.5247	12.5361	7.76395	60.5309	34.8817	12.178	7.99743	11.8813	18.0755	45.1331	29.6588	15.4224		564.774	9.10072		560.88	56.1233	26.7622		561.759	10.6541	18.9199	9.26809	28.2018	49.7459		564.231	14.8353		565.473	30.666	56.6314		559.471	8.54935	27.4971
362.426	6.35022		435.053	12.9923	26.8629		362.425	15.3313	12.7459	8.49216	65.7038	26.9388	7.56302	6.58393	10.8332	17.6062	45.6195	20.932	8.8976		566.45	9.93279		562.545	52.8203	25.5342		563.426	13.5366	16.3541	14.7403	21.5113	45.4835		565.905	22.471		567.151	12.1496	51.5773		561.132	31.4596	30.0362
363.502	8.55868		436.34	9.47668	25.8234		363.501	11.8666	11.8431	10.5076	65.7738	28.0886	7.80268	9.56126	12.248	20.7918	44.4572	9.08058	9.3523		568.127	8.80303		564.209	46.4962	26.6917		565.093	12.0212	17.5648	15.3983	18.8391	69.1723		567.579	22.7051		568.83	27.4895	47.5982		562.792	35.9675	26.9352
364.569	7.92362		437.633	14.1875	29.7694		364.569	14.2079	9.23636	11.3863	65.0922	28.0097	6.54262	9.81882	11.7613	17.8092	44.0024	37.0565	8.42434		569.803	7.98161		565.873	41.7819	23.1892		566.761	12.8389	18.0392	10.7222	15.1634	70.1778		569.254	16.4998		570.507	11.2076	39.5996		564.452	25.5634	26.1507
365.646	3.55722		438.917	13.3377	31.8001		365.645	7.78091	10.1058	13.9671	68.9759	32.0008	6.49643	8.93483	11.4051	24.6478	43.0586	38.9163	13.4063		571.478	8.94567		567.537	24.0278	20.8941		568.428	12.5048	19.0738	11.9253	16.3552	69.6538		570.928	22.1923		572.185	9.99331	38.055		566.111	11.1	26.9934
366.714	6.80224		440.208	12.0269	33.2272		366.713	11.9468	9.46907	10.1733	73.6356	33.6967	7.43593	8.8667	10.4638	38.8851	39.0299	43.314	9.39315		573.154	7.77493		569.201	28.6788	16.135		570.095	11.2474	15.5966	10.895	12.5223	57.1343		572.602	24.9421		573.863	15.7625	33.3282		567.772	19.3209	22.8864
367.79	3.81891		441.5	15.1286	25.2493		367.789	12.7615	8.85073	10.2704	69.5363	36.1704	12.4213	9.55973	11.8564	50.5176	40.0125	35.9535	8.93622		574.83	7.97267		570.866	25.4395	31.1604		571.761	9.70124	15.6296	9.34434	8.32092	52.1181		574.277	15.7732		575.541	10.9991	30.8431		569.433	15.1592	22.9662
368.858	5.16678		442.78	19.3696	32.534		368.857	11.1926	7.26511	10.6057	71.4187	25.7166	14.3451	6.37563	10.3434	58.9154	40.6529	52.916	12.5775		576.507	7.53197		572.531	19.9296	24.0345		573.428	10.1445	16.324	10.9697	7.66859	65.1934		575.951	10.1905		577.22	12.917	27.1845		571.093	26.6444	25.3042
369.938	6.27841		444.073	18.9254	32.9667		369.934	12.1377	8.76867	5.52016	69.8734	20.851	6.49627	7.89718	12.7414	72.1954	41.6067	55.2179	5.30116		578.183	5.62859		574.195	19.6348	16.2553		575.095	8.95378	19.0137	14.847	10.8807	48.573		577.625	17.2093		578.898	21.1092	24.9615		572.753	22.0197	23.302
371.006	3.91967		445.356	13.0782	36.6093		371.001	8.45356	8.48605	12.9651	72.4953	30.0805	17.0892	9.75021	14.9244	87.6373	43.0239	56.7113	6.82135		579.858	5.57387		575.859	15.735	23.964		576.762	6.2844	12.1558	17.5626	9.92666	68.3919		579.299	19.6736		580.575	19.8864	23.9144		574.413	31.9083	26.7779
372.082	4.04827		446.649	16.9497	29.8135		372.077	10.3108	8.60825	10.9454	68.1204	36.9186	10.1832	11.3686	13.859	100	41.1199	59.0256	5.06342		581.533	5.16942		577.523	15.7342	21.2058		578.43	8.54693	14.2039	16.5305	7.68954	77.3811		580.974	18.8975		582.253	13.2393	20.7725		576.072	27.7466	30.9743
373.149	7.97413		447.937	14.1637	33.9103		373.153	9.89236	6.55651	14.5357	64.8211	33.2394	7.90373	1.77131	13.6626	88.4586	44.9389	57.7187	6.07581		583.209	5.23781		579.188	22.7834	19.1325		580.097	6.8029	12.0027	18.7479	6.34047	79.1041		582.648	7.40235		583.931	10.4519	20.4456		577.732	30.1509	30.3581
374.225	4.08047		449.22	7.72459	36.0684		374.221	15.5058	8.76136	10.7024	62.5545	32.331	9.81712	8.26366	16.0838	83.2734	44.3436	56.6909	9.11252		584.885	5.14653		580.852	21.4244	21.2071		581.762	7.96649	16.1405	22.4503	16.0222	57.4507		584.322	18.5708		585.609	1.6003	14.5548		579.394	22.2847	22.0735
375.302	6.13229		450.508	16.4844	28.0296		375.297	9.52759	11.7863	11.1877	58.6647	40.4349	15.5924	8.73199	15.9206	97.5984	46.2604	60.0337	13.1549		586.562	5.85352		582.516	25.029	23.6225		583.429	8.84008	11.505	32.6213	8.03204	53.5114		585.997	15.8781		587.287	14.3118	17.5452		581.054	23.2988	25.3786
376.369	5.33542		451.796	7.44722	28.2811		376.365	9.03535	9.60943	14.7436	54.8918	35.5366	9.8184	5.67463	14.9905	95.7953	49.2223	62.4605	7.35162		588.238	6.54278		584.181	27.5949	31.5937		585.096	7.71731	16.8055	30.4574	6.72286	42.047		587.671	22.1541		588.966	23.5798	16.0628		582.714	27.5629	23.4315
377.445	4.1218		453.076	14.3725	32.5768		377.441	11.0643	9.76011	8.38587	47.9891	33.6754	16.1277	4.11886	16.5713	94.7958	52.2876	66.7337	7.49557		589.914	6.97321		585.845	25.5742	16.8593		586.764	9.04565	13.0982	39.8124	3.66012	42.6858		589.345	19.0502		590.643	21.2177	15.0083		584.374	16.159	29.7055
378.513	3.51311		454.364	11.365	33.0737		378.509	17.2044	8.90299	9.44785	48.0628	43.8485	16.3404	7.40508	18.0879	92.6543	51.139	67.2931	8.27923		591.589	5.17729		587.509	19.7243	30.7976		588.431	5.14439	13.2221	41.9684	4.69194	47.1932		591.019	12.4124		592.321	13.8172	13.5219		586.033	31.5409	20.8495
379.589	4.38664		455.657	13.2955	25.9158		379.585	15.9112	10.101	10.7755	44.6807	31.8911	12.7007	8.63135	14.1067	84.7269	55.1721	54.0088	10.049		593.264	7.58051		589.174	21.0841	20.3612		590.098	5.49554	10.0471	62.2381	8.51765	62.7222		592.694	23.7821		593.999	21.6928	16.7838		587.694	30.3786	23.5351
380.658	7.05557		456.941	12.4648	28.6898		380.653	13.6809	11.78	12.3827	41.7062	25.5878	22.0421	4.07913	15.6232	90.0745	56.8554	40.4081	7.28997		594.94	6.57221		590.838	22.6757	20.0501		591.764	4.89319	13.8996	78.8399	7.79567	55.5626		594.368	20.5872		595.676	18.5694	11.9084		589.354	17.2401	26.2804
381.733	6.78018		458.228	13.295	38.6856		381.729	11.6892	10.0926	6.93709	41.6189	27.9495	16.5113	11.1465	18.4097	79.5536	58.8456	51.924	9.21278		596.617	5.91248		592.502	19.2687	17.9956		593.431	4.69486	11.0881	91.7495	8.68235	57.231		596.043	20.8913		597.355	16.9406	12.0688		591.015	12.1811	26.2018
382.801	5.52547		459.52	20.792	34.3301		382.797	11.845	10.8676	9.88367	32.9395	20.4802	20.242	6.65058	22.652	69.6422	61.8441	46.8744	2.26192		598.293	6.6711		594.167	21.6301	30.2654		595.098	4.70046	12.8908	82.5435	6.97954	61.6383		597.716	18.1599		599.033	20.3812	10.6784		592.675	24.5636	24.8315
383.877	8.51887		460.8	16.5969	38.6724		383.873	13.5523	9.79677	8.58079	32.1647	19.3805	13.7945	9.75887	24.8497	60.9269	63.9489	35.1971	4.73584		599.969	6.09372		595.831	12.2006	26.3994		596.766	4.67308	17.0864	72.8336	7.75062	66.7532		599.391	24.8578		600.71	15.5679	9.03689		594.335	22.4015	28.1697
384.946	5.89483		462.088	13.9854	37.672		384.941	14.9299	11.2104	11.6784	29.9615	23.0707	21.7442	10.4908	23.9533	56.1906	64.7254	33.0868	6.95135		601.644	6.44564		597.495	18.5702	27.9702		598.433	5.61906	14.6834	64.3728	8.83063	55.8001		601.065	23.6778		602.388	28.4763	10.0808		595.994	25.7471	22.2674
386.022	5.69471		463.369	19.6585	38.1288		386.017	11.5301	11.4282	9.84484	28.5632	22.5749	25.7306	8.75103	23.1955	52.4977	66.4168	30.0289	7.04845		603.32	6.77463		599.16	21.2446	32.5592		600.1	2.68499	11.3725	50.0067	10.1157	40.9259		602.739	19.5481		604.066	9.88529	14.1883		597.655	9.18172	22.2115
387.09	6.096		464.657	14.8508	41.1165		387.085	14.0951	10.7697	10.8575	27.2562	23.1946	21.7694	13.5973	29.5032	56.1377	63.362	22.9876	5.96954		604.997	8.02387		600.824	9.79522	25.3123		601.766	6.1271	13.3024	40.4045	10.6088	38.8713		604.413	30.6879		605.745	15.0037	11.6057		599.315	12.8947	18.4878
388.165	3.4912		465.948	17.4048	38.1511		388.161	15.3987	10.2846	9.00757	20.2739	24.0242	21.8126	7.47784	28.6989	57.3302	69.7949	25.5487	6.90549		606.672	6.77644		602.488	35.8626	39.5649		603.433	7.09125	13.6779	30.2873	0.978416	38.784		606.089	22.3399		607.423	26.2419	10.7687		600.975	18.482	22.8375
389.242	4.95835		467.228	14.6159	30.4093		389.237	15.0788	11.3499	10.858	21.7952	27.6038	21.5893	8.97099	30.3664	39.5627	67.5146	12.1774	4.51412		608.348	6.67116		604.153	37.0941	41.0141		605.101	3.89759	10.6081	31.2614	6.31895	34.9046		607.762	25.1964		609.101	12.0579	10.282		602.636	20.2182	24.6887
390.31	6.49577		468.516	10.4279	35.06		390.305	13.6108	9.82071	10.4734	17.8354	22.1149	18.4976	7.24163	30.0206	48.9693	65.9196	8.53316	3.96521		610.024	5.31382		605.818	27.5493	42.0999		606.767	5.27164	14.3488	26.4381	9.0598	27.2473		609.436	19.86		610.778	4.04064	6.26514		604.296	34.9889	22.6542
391.385	6.20613		469.804	16.5098	33.3995		391.381	14.3451	9.31743	9.81245	14.4137	16.4782	18.3638	7.24089	33.7402	54.8342	67.1108	15.0839	4.48613		611.699	6.71645		607.481	35.8872	34.0583		608.434	4.1147	17.1405	30.6408	6.85221	42.2632		611.11	23.7548		612.456	23.2969	9.309		605.956	3.22538	21.2426
392.453	5.09791		471.088	11.1081	34.8091		392.449	20.0161	9.85985	10.1858	15.0815	24.9498	15.6646	8.94179	33.0135	58.0069	64.8766	13.7268	8.08457		613.375	6.26121		609.146	28.178	45.411		610.101	3.93088	16.1028	20.6786	12.9942	39.716		612.785	15.8561		614.134	17.8578	8.58471		607.616	22.5852	21.4983
393.529	5.78125		472.376	18.8593	35.2482		393.525	14.3153	11.1252	9.58195	9.66185	26.805	12.1717	5.33005	34.0123	53.4502	67.4534	14.6707	9.82364		615.052	6.70894		610.81	34.7513	28.7231		611.767	2.99361	17.5078	19.1496	5.66493	30.5267		614.459	24.6252		615.813	28.6126	8.99256		609.276	7.91697	26.7985
394.597	6.80242		473.669	15.0078	32.2002		394.593	10.1096	13.3643	14.9962	14.8984	27.8524	18.6339	7.29655	31.4589	55.2804	70.3275	7.16809	7.88899		616.728	6.33967		612.474	22.2386	47.2224		613.434	4.83764	21.0512	16.4399	8.21478	29.4319		616.134	23.3727		617.491	14.8203	13.7632		610.936	24.4823	18.5043
395.674	4.78447		474.953	21.2418	32.4475		395.669	14.9634	11.8399	11.0912	10.6847	27.8948	20.5203	4.7862	33.6851	52.7722	66.3501	4.60089	11.9758		618.404	5.99099		614.139	26.8892	44.0329		615.102	2.94313	19.503	15.8613	10.5959	29.4978		617.808	17.3098		619.169	27.901	7.49412		612.596	41.8637	21.5317
396.741	4.02964		476.241	20.4608	37.5043		396.737	17.6367	9.24339	13.7586	10.3248	15.7809	11.8651	3.21247	32.6197	47.8532	67.2381	9.17419	7.24025		620.079	6.06316		615.803	24.1693	25.7961		616.769	2.72629	21.4867	11.3556	4.27776	23.6179		619.482	19.3569		620.846	9.55174	6.14702		614.258	28.0116	18.7448
397.818	6.36325		477.52	15.8943	39.611		397.813	20.5993	9.40947	12.3718	10.0304	20.9248	13.0153	2.66379	32.6242	52.4026	68.1895	12.1041	6.53167		621.754	6.27559		617.467	22.22	30.1444		618.436	3.5554	13.549	7.49845	9.19206	19.7877		621.156	16.6085		622.524	6.52517	9.07189		615.918	13.2621	32.0209
398.886	5.47394		478.808	19.9322	25.4452		398.881	13.7171	10.4349	15.9945	8.3873	23.3951	15.6257	4.62704	32.1885	50.8848	70.066	3.09957	10.8754		623.431	5.05775		619.132	20.5199	39.9264		620.103	9.4197	18.812	12.15	8.37795	22.4359		622.831	12.3474		624.203	13.5033	7.46918		617.577	32.092	33.6103
399.962	6.64958		480.096	18.0226	41.2672		399.958	19.2755	9.54108	7.27473	9.35715	18.2009	16.5632	0.909314	36.0697	38.3154	71.9667	12.321	6.4679		625.107	6.14295		620.796	14.4648	47.776		621.769	9.22734	15.3223	7.85407	9.16885	20.3862		624.506	20.8154		625.881	21.6096	9.27928		619.237	20.6441	21.4996
401.03	5.7246		481.376	18.4261	34.0064		401.025	12.8489	9.60255	13.198	6.33007	19.3488	12.2689	5.67018	40.3773	43.6041	71.0087	15.2099	7.47363		626.783	8.05948		622.46	21.943	43.1657		623.437	4.85332	14.0204	6.7084	4.13376	17.0934		626.18	9.86884		627.559	28.0929	10.5931		620.897	17.6075	21.3102
402.105	6.73072		482.665	15.17	33.1498		402.101	19.1098	9.16336	7.29205	8.30151	19.6169	11.3512	4.31691	37.3123	46.1019	70.2543	6.00489	11.1457		628.459	8.70409		624.124	19.8586	42.0288		625.104	6.33389	18.4814	6.20423	11.6667	29.7814		627.853	15.5709		629.236	13.5564	7.95511		622.557	21.0343	26.9342
403.174	5.81175		483.956	11.0101	35.702		403.169	18.9071	10.1751	12.3968	6.2393	20.2863	12.6467	8.26247	42.7333	35.4334	75.1668	7.48697	9.82092		630.135	6.06051		625.79	25.3428	49.0338		626.771	6.87017	17.8497	11.2145	9.51046	16.4325		629.527	9.08752		630.913	33.034	9.59257		624.217	43.3122	26.8433
404.25	3.96188		485.241	10.9354	26.9626		404.245	16.5994	9.62144	9.7606	7.87734	17.7873	9.19322	5.46111	40.5183	38.2822	70.6133	14.7817	12.9933		631.81	7.13603		627.453	26.863	49.6378		628.438	6.86388	12.1878	7.42049	9.2173	19.8154		631.202	13.1501		632.591	20.398	7.67053		625.879	30.3574	29.8496
405.326	9.17465		486.528	17.7531	22.7189		405.321	12.6662	11.8936	7.54086	6.54195	21.9501	13.4691	3.72925	42.2355	42.1009	73.999	15.4352	14.3758		633.486	6.59456		629.117	30.6095	53.745		630.104	8.60905	14.183	8.72623	10.7872	13.9097		632.877	7.67566		634.27	18.386	10.4361		627.538	17.2257	20.8042
406.393	6.06633		487.82	14.8483	29.8732		406.389	16.8244	10.8309	10.54	3.45762	26.3748	14.4275	1.89788	46.0482	43.8017	70.2145	21.2113	13.5482		635.162	6.56258		630.782	22.0144	42.1504		631.77	10.2939	17.6299	7.81601	7.93764	20.1689		634.551	4.54041		635.948	22.9823	8.47365		629.198	35.9675	22.5389
407.469	6.36431		489.1	12.4251	34.7232		407.465	11.0046	9.83272	7.38381	5.17175	20.0273	10.1556	3.90113	44.8301	47.7201	71.5276	7.5923	15.7409		636.838	5.50926		632.446	23.1499	37.2697		633.438	10.7098	16.0243	4.82794	12.6018	19.0985		636.225	2.71733		637.626	16.4046	11.4067		630.858	19.1372	18.2185
408.537	5.82407		490.392	8.68598	35.1971		408.533	15.0422	12.3013	10.7721	7.76491	23.4466	9.57282	3.02724	43.9542	45.8682	67.3003	13.6306	5.60173		638.514	7.24923		634.111	19.2978	43.8571		635.105	14.9971	19.7915	8.26286	12.461	13.8621		637.899	8.41016		639.303	22.7268	10.5975		632.518	34.2541	21.1805
409.614	8.64797		491.685	9.09793	38.5723		409.609	13.1511	11.1934	9.41498	5.52082	33.153	3.66713	6.26686	43.1332	43.0698	71.5781	13.7426	8.39697		640.19	6.32961		635.776	18.8388	43.4781		636.772	15.6097	19.4547	7.94389	8.69004	20.8646		639.573	13.4074		640.981	11.1327	11.9097		634.179	35.761	18.7974
410.682	8.30599		492.968	10.6837	40.4917		410.677	16.8916	10.6244	9.49435	7.73352	21.3059	9.68619	6.54947	50.1243	32.94	68.5534	9.85877	10.7513		641.866	6.65067		637.439	9.29441	37.1974		638.439	20.9061	15.4913	9.94694	7.6863	19.7205		641.247	9.00513		642.659	11.33	11.6109		635.839	17.6887	15.5259
411.758	9.82711		494.257	8.58192	43.0436		411.753	19.7157	13.3663	9.54643	4.10627	18.4114	8.02857	5.11484	48.9584	33.1544	69.6437	17.3181	7.31673		643.542	7.06002		639.103	13.5164	41.7384		640.106	21.5938	13.0173	4.36989	5.72745	16.2632		642.922	1.35471		644.338	6.3641	7.59347		637.499	17.6075	18.6018
412.825	2.14083		495.541	8.27455	39.4859		412.821	11.5766	9.57096	11.5401	8.28221	24.3958	8.06936	3.31006	48.9863	26.6579	70.8166	18.1745	8.74165		645.218	7.8214		640.768	23.8935	32.0761		641.772	21.1547	15.5906	5.50662	5.99393	22.5727		644.597	6.29916		646.016	18.5276	13.4005		639.159	15.078	24.4044
413.901	6.13266		496.828	8.74167	37.7704		413.897	19.7004	9.45028	7.27736	6.56533	19.9276	10.2446	9.04074	50.0186	29.1056	71.2675	10.3074	5.21023		646.894	8.02622		642.432	22.3991	41.2547		643.44	29.6301	14.1808	5.46772	13.1262	17.5619		646.271	14.5822		647.694	1.60064	11.9589		640.819	11.365	26.3651
414.97	5.59532		498.116	3.03472	37.1223		414.965	13.2128	9.68429	7.96279	3.40156	22.6757	9.62754	5.16136	53.2458	28.6226	74.9061	9.94379	3.86304		648.569	8.6441		644.097	22.1039	37.2691		645.107	35.4489	20.211	6.23693	12.5903	17.5292		647.944	11.0139		649.371	19.7475	9.19832		642.479	12.1811	20.6198
416.046	6.10422		499.4	11.2789	32.6578		416.041	14.4209	8.88587	12.373	2.37753	23.0874	8.08335	4.30977	53.9603	20.4258	71.1185	12.7053	8.55366		650.245	8.26275		645.762	19.1864	49.5887		646.774	47.4563	18.4479	7.16591	9.49784	13.0192		649.619	3.16928		651.049	6.49716	9.77843		644.14	22.8502	23.5815
417.114	6.60327		500.688	11.7072	36.8843		417.109	13.0626	7.88545	10.8298	5.66857	15.6156	8.78872	2.72121	55.4093	19.8976	72.1584	10.3498	5.84551		651.921	8.48432		647.425	23.5084	15.9928		648.441	61.2127	19.7173	5.23261	5.20229	23.3407		651.293	0		652.728	11.33	8.93188		645.8	35.0262	18.434
418.19	5.43242		501.98	1.62257	31.9253		418.185	17.5741	10.4365	8.8017	7.35876	24.2778	7.39854	0.307848	56.7666	22.0109	75.9808	13.6414	10.4294		653.597	9.11099		649.089	17.7477	15.8913		650.108	91.0744	30.49	4.49436	5.63111	15.9624		652.968	3.77056		654.406	15.1013	12.9486		647.459	31.2547	16.3591
419.258	5.74294		503.265	10.4954	41.3205		419.253	16.3252	10.9611	8.97411	5.54434	26.9013	10.2495	5.109	56.3128	17.006	72.1998	17.1837	11.6869		655.273	12.005		650.754	22.7394	29.349		651.775	100	25.5207	7.6212	2.66732	11.4609		654.642	5.62799		656.084	26.3449	7.83159		649.12	34.8865	19.465
420.334	9.74372		504.557	7.22176	45.5527		420.329	14.7735	11.6985	9.26136	3.70016	24.9496	2.87933	3.27923	58.4701	18.5259	72.8045	16.1374	8.68346		656.949	14.8152		652.418	20.5655	42.2719		653.442	96.3999	23.1674	10.952	5.76677	22.1374		656.317	6.4303		657.762	21.4177	7.99553		650.78	29.8859	27.5292
421.41	7.8845		505.849	6.06622	39.5189		421.405	12.4722	8.91663	10.1323	8.44471	25.509	9.93041	2.93004	60.7855	22.1074	74.1709	16.0954	9.24015		658.625	15.0073		654.083	19.2501	29.4195		655.108	90.9027	25.1215	10.4783	8.67515	17.2669		657.99	7.20605		659.439	8.79824	11.6538		652.44	11.8137	16.952
422.478	7.62729		507.129	7.32698	37.1711		422.473	15.81	9.28701	10.9851	6.7602	25.1369	12.9469	4.47099	58.5271	22.5398	74.4833	14.884	7.25398		660.301	21.4609		655.748	24.9387	25.1714		656.775	82.5055	27.2459	6.15294	2.2741	12.9171		659.664	0.0884833		661.118	13.867	10.4861		654.101	14.2619	25.5209
423.553	7.45883		508.421	5.68936	45.7965		423.549	16.4513	10.5769	8.31422	6.50536	22.8357	10.8208	5.80794	61.4168	17.4978	76.0686	17.9514	6.00436		661.976	27.8787		657.411	22.0144	25.917		658.442	79.199	33.6188	7.72361	10.3796	17.6358		661.338	5.70552		662.796	2.60959	11.5389		655.761	37.5768	19.6364
424.621	9.36995		509.705	4.63891	53.9494		424.617	17.2982	10.7601	12.8664	8.2291	24.1057	9.6841	5.23588	61.9255	19.6784	72.2986	20.1355	9.3148		663.652	37.6979		659.075	24.4193	30.0229		660.109	70.9255	36.5505	8.78817	10.3469	21.5671		663.014	14.713		664.474	8.71504	6.62829		657.42	18.9747	31.4448
425.698	9.098		510.993	3.90224	43.5408		425.693	19.5307	8.78206	9.13625	3.7137	23.3228	11.4909	7.68838	61.6897	22.0819	71.3666	12.465	5.35027		665.328	49.7789		660.74	20.1094	27.3662		661.776	64.7529	42.1484	12.7462	8.57735	18.9834		664.688	7.47996		666.151	23.3492	7.01827		659.08	20.3207	30.7809
426.766	5.4015		512.284	5.57924	47.1938		426.761	14.9251	11.9147	13.7665	6.7218	28.9435	9.3722	6.85172	59.5703	15.8815	75.669	21.2229	1.89705		667.004	63.1183		662.405	13.6502	30.385		663.443	59.3848	41.7587	6.8134	9.22992	20.698		666.362	14.7512		667.829	7.54212	9.91027		660.741	24.666	32.3504
427.841	9.01212		513.569	7.77075	50.681		427.837	14.6361	9.16056	11.4598	6.66384	17.3463	17.1091	10.1864	56.3379	17.1176	75.615	11.2772	9.57391		668.681	69.8649		664.069	18.9549	22.0523		665.11	49.9287	43.5305	7.81447	11.4903	16.6714		668.035	6.876		669.506	7.36986	7.40408		662.402	18.482	35.2076
428.91	7.30096		514.856	7.40109	46.8736		428.905	17.6065	10.6086	11.0675	9.39773	25.6007	15.3955	12.2866	59.0655	17.1836	74.5107	18.5065	10.6605		670.356	73.2466		665.733	22.5599	33.526		666.777	38.518	42.1431	6.67105	10.9636	15.7547		669.71	7.81864		671.185	22.7602	6.29158		664.062	30.0924	38.9719
429.985	6.83409		516.145	7.09288	46.5692		429.982	11.802	13.3599	10.8304	7.33939	19.3241	15.2873	9.71942	58.1709	13.0761	73.3367	7.59613	8.9954		672.032	69.6445		667.397	19.5896	30.7976		668.444	32.5402	48.3289	12.4928	8.49015	16.2678		671.385	11.2453		672.863	7.31148	8.29346		665.722	23.1151	35.9092
431.054	8.66344		517.429	1.81017	54.6569		431.049	18.759	10.3402	10.8112	7.04393	28.0698	10.4817	7.19364	52.1443	15.2942	73.7153	11.2583	10.5587		673.708	62.3824		669.061	17.4601	7.97181		670.112	23.7964	49.2677	10.5599	10.2935	12.98		673.059	8.56613		674.541	19.5752	12.1428		667.381	28.8277	29.807
432.13	7.61142		518.721	9.68294	57.826		432.125	14.9831	11.6745	13.1148	5.66427	18.7814	19.6165	10.0082	53.0363	13.655	73.4313	8.49295	8.94203		675.383	58.4384		670.725	24.9133	16.7177		671.778	16.5349	41.9142	7.45714	7.16316	18.325		674.734	8.09134		676.219	2.62611	8.22307		669.041	33.8054	25.296
433.197	7.30301		520.013	0.634221	55.3701		433.193	21.0086	11.0577	15.0527	7.29076	18.2923	17.4601	7.71966	51.9537	10.797	73.9403	15.4108	10.5176		677.059	54.5973		672.391	22.4882	18.2368		673.445	14.4456	46.4233	10.0387	6.0871	24.5921		676.408	14.3087		677.897	27.3925	13.1225		670.701	31.3344	32.0031
434.274	6.37105		521.296	3.75562	53.7745		434.269	21.7172	11.7678	9.10066	2.9472	19.3964	16.3693	14.4273	51.9369	15.4651	76.8754	16.9845	13.932		678.736	49.9444		674.055	15.2152	31.8343		675.112	10.2161	55.3531	9.9791	6.4297	13.6261		678.081	16.9948		679.574	20.3116	8.4783		672.363	30.3346	29.4768
435.342	6.167		522.588	1.58083	60.9201		435.337	20.9749	12.9043	7.02871	4.88936	19.8741	17.8698	8.46728	44.4486	13.4074	74.7943	6.86387	5.02871		680.411	46.9712		675.719	24.9847	28.0711		676.779	8.50652	67.953	10.9439	8.95998	16.7473		679.755	6.47043		681.253	12.2139	10.4506		674.023	25.1732	21.8375
436.417	6.74461		523.88	2.25756	55.0242		436.413	22.3353	14.1461	5.46541	7.59652	16.0925	15.5639	10.4261	46.7507	12.2347	77.3204	6.6417	7.37935		682.087	42.3081		677.383	21.2446	29.9524		678.445	9.03073	74.4636	12.2577	11.0867	12.035		681.431	10.7828		682.931	17.0133	9.10312		675.683	30.7248	32.4137
437.682	6.48084		525.161	3.46444	65.0733		437.489	21.0781	11.7247	8.48856	6.63633	21.0941	14.7224	10.0399	41.5443	13.5896	74.5981	11.1722	10.3112		683.763	37.5548		679.047	26.2545	35.3879		680.113	6.31722	78.6407	16.3185	10.058	16.9947		683.105	16.9308		684.609	11.5494	12.2551		677.342	25.2171	24.666
438.75	7.43013		526.452	2.39189	64.8193		438.557	19.0295	12.8207	9.94788	6.01832	31.3166	14.5521	11.3472	40.0451	12.3228	74.6825	10.6766	11.1938		685.439	36.1063		680.712	22.0857	33.8888		681.779	8.60219	80.4985	12.2968	7.67692	25.3458		684.779	10.4955		686.287	9.61523	13.8905		679.002	18.5048	27.2356
439.825	4.85615		527.736	5.22739	63.9426		439.633	21.5836	12.667	7.77585	8.79732	25.0373	16.9787	4.00898	41.7782	13.6173	71.1946	21.3542	12.272		687.115	31.0828		682.377	20.5199	31.2309		683.446	4.18303	87.607	15.9435	10.8815	15.1947		686.453	13.3257		687.965	23.3964	8.41661		680.662	20.137	24.7794
440.894	5.77986		529.025	3.87756	65.4054		440.701	16.4962	12.1886	14.0487	13.3904	18.8733	13.2795	5.19716	36.6983	14.1212	73.7434	9.54916	12.4706		688.791	27.4077		684.041	20.4046	28.4533		685.113	3.53148	84.9953	18.3912	12.9673	19.6409		688.127	22.514		689.643	20.6897	11.9182		682.323	18.9747	29.4806
441.969	6.6298		530.317	1.63122	61.8336		441.777	20.3521	13.2106	11.238	9.20785	24.5293	9.94616	10.7461	35.618	16.2249	69.7864	17.226	12.0035		690.466	29.7602		685.705	23.2842	33.1426		686.78	2.61804	91.0089	13.2595	20.2882	13.4397		689.802	16.0944		691.321	11.5246	10.5404		683.983	34.7824	27.3957
443.038	5.7114		531.596	2.96078	61.4043		442.845	15.064	14.0461	10.702	11.2317	26.0207	10.6618	6.76496	32.3227	11.2759	70.2029	11.6969	12.9716		692.142	23.4842		687.369	16.5044	22.6557		688.447	2.83287	92.5911	12.4513	14.1456	22.0699		691.476	5.70532		692.999	19.2811	11.102		685.644	10.2839	24.964
444.114	5.81954		532.884	7.82931	83.9103		443.921	21.9275	13.5475	10.2281	9.596	21.32	16.8397	7.78126	31.5322	16.6275	70.2835	7.71401	15.1576		693.818	23.2927		689.033	14.9838	14.2513		690.115	0.638544	100	13.2588	21.2738	18.1073		693.15	2.87358		694.677	23.3964	12.545		687.303	38.9524	24.8626
445.182	8.66208		534.172	7.76218	76.0303		444.989	18.5453	14.6898	10.0777	11.5682	25.2423	9.02638	7.03304	30.7632	13.4927	71.6763	12.9829	12.7029		695.494	22.1418		690.698	25.9146	34.13		691.781	3.1807	95.858	15.4365	22.7824	12.4902		694.825	9.57181		696.355	22.8349	8.6104		688.963	22.0341	34.7401
446.258	7.88741		535.456	7.30947	84.5701		446.065	16.6085	13.0902	9.78002	13.0303	18.8202	9.10924	1.69991	28.6041	11.265	71.9755	14.3883	8.76975		697.17	21.9029		692.363	17.9085	7.00501		693.448	3.52625	90.8417	18.6072	26.4213	11.3393		696.499	18.6414		698.033	25.0082	11.7079		690.623	39.8642	23.4104
447.326	5.26837		536.749	3.68835	84.0586		447.133	20.7097	13.4096	10.9872	11.6725	30.9331	14.4115	5.56825	26.3959	20.7026	76.1067	14.6522	8.9565		698.847	20.0499		694.027	25.4577	12.3189		695.115	3.62481	82.61	20.3658	18.6351	11.0359		698.172	14.1365		699.711	25.5474	13.2216		692.284	6.65223	24.0948
448.402	9.79686		538.041	3.33847	84.9803		448.209	17.9216	13.7027	14.5545	11.8652	12.4389	14.7343	8.08522	23.3262	14.0549	77.6867	19.9533	12.2006		700.522	20.0486		695.691	13.8745	18.1664		696.782	2.66896	84.8521	16.8855	29.5724	15.0888		699.848	18.1077		701.388	20.0672	12.9917		693.944	14.7106	31.0851
449.47	7.57604		539.324	6.20031	84.58		449.277	20.6524	14.6003	8.56895	9.85386	26.2396	7.60855	5.77363	19.4314	16.2086	76.0638	15.7246	8.19197		702.198	19.8775		697.355	15.3947	22.5348		698.45	0.813938	81.1632	19.0312	30.5215	15.1234		701.522	20.6241		703.066	17.4581	9.53414		695.604	20.0557	28.6279
450.545	8.21889		540.612	5.18012	87.9288		450.353	21.1136	12.5944	10.2786	13.0966	29.0066	13.5011	7.75133	20.5991	12.7217	77.7019	10.5081	9.33757		703.873	18.4449		699.02	16.5754	16.0639		700.117	1.4879	76.9362	17.2836	31.2123	19.0676		703.196	5.90222		704.744	31.0027	11.4653		697.264	23.7832	23.8771
451.621	8.4625		541.904	3.12569	98.5139		451.421	20.6405	13.1156	8.29339	16.4383	19.8131	16.3053	10.4939	20.0382	10.3633	78.5669	8.497	13.6689		705.549	17.7144		700.684	21.3345	26.8923		701.783	1.90495	75.138	24.7898	32.8396	16.3615		704.87	18.4082		706.422	32.3367	13.597		698.924	32.1732	21.452
452.69	5.91563		543.184	4.25496	89.097		452.497	20.0203	13.6578	9.08427	11.7694	16.5416	20.9171	11.1305	17.2734	12.1442	80.4378	4.82619	5.77936		707.226	15.7867		702.349	16.2988	27.1237		703.449	1.1655	65.886	21.6926	30.6524	16.0036		706.545	6.93892		708.101	25.1111	14.0618		700.585	25.7031	28.0557
453.766	6.04994		544.477	0.570489	89.5545		453.573	20.2162	10.5456	8.25244	7.6189	32.6855	17.4728	8.7081	11.9509	10.2621	81.1903	14.7092	9.74209		708.902	11.3093		704.013	18.9997	25.7961		705.116	0	75.196	21.9547	31.967	17.9214		708.219	13.9322		709.778	32.3836	11.8094		702.245	35.3351	30.5577
454.834	6.42402		545.761	6.59747	100		454.641	22.9878	12.2332	12.3669	12.6116	23.5111	17.2097	7.01118	14.9687	11.0234	84.2301	16.5737	11.5609		710.577	11.455		705.677	23.6943	28.8148		706.784	0.54871	70.6074	19.5033	30.3122	10.4355		709.893	25.2788		711.456	29.9524	12.081		703.905	27.3792	25.4648
455.91	5.69499		547.052	4.90057	91.8961		455.717	19.6867	9.96637	9.84381	8.19716	30.9516	16.8794	5.43084	12.2605	8.74851	82.8081	16.1031	11.9113		712.253	10.7934		707.34	19.1792	22.1021		708.451	0.191297	65.1779	17.3387	22.2623	13.0604		711.567	12.4952		713.134	63.9895	10.1872		705.565	25.5634	32.2995
456.977	5.208		548.344	5.07599	90.8165		456.785	18.8733	11.0574	12.1778	8.8797	23.857	15.8841	9.37007	10.7826	13.2251	78.8863	15.4818	9.56588		713.929	10.6791		709.006	17.2287	14.9257		710.118	0.0305189	56.8387	21.8533	16.4109	20.3946		713.242	7.96619		714.812	51.9925	12.0893		707.224	13.6083	29.3626
458.054	6.59767		549.624	6.12536	98.2005		457.861	19.6258	11.3474	11.302	8.80992	29.0165	19.686	7.87851	7.681	16.115	80.2124	10.926	8.80583		715.606	9.25475		710.67	16.6205	35.6291		711.784	2.27502	51.2766	23.0885	13.6789	18.5263		714.916	19.2534		716.49	42.5188	10.9917		708.885	19.3793	22.7213
459.122	4.20897		550.912	3.89071	95.0551		458.929	20.0564	11.9858	9.32625	11.3388	30.5978	10.5232	7.84657	6.53062	18.4833	75.6824	18.5361	11.9356		717.281	10.2313		712.334	20.5647	33.817		713.451	1.89659	38.9718	20.0634	12.5074	7.70696		716.59	17.0363		718.169	50.8032	14.5752		710.546	12.4316	20.4841
460.198	7.09358		552.201	6.87798	90.5707		460.006	20.7161	9.44093	9.30785	10.1943	28.6413	14.2596	5.66451	7.93365	15.8482	77.6677	8.85139	6.59958		718.957	10.4655		713.999	18.0508	40.6513		715.118	0.674154	39.817	21.2146	17.7789	17.2783		718.264	21.5329		719.846	63.6389	13.8595		712.206	17.6887	22.1887
461.265	10.1244		553.484	1.16088	84.7896		461.073	15.6566	13.2502	10.9413	10.9844	28.1536	12.2974	2.66282	7.2674	10.6032	77.332	12.199	10.5694		720.632	8.99784		715.663	14.8491	21.4975		716.786	2.58488	33.437	18.9061	12.0143	18.2614		719.939	20.4603		721.524	59.8183	16.4852		713.866	31.9895	26.1031
462.342	7.14899		554.777	2.54984	83.3193		462.149	13.2955	10.3292	11.4387	9.04949	20.1448	18.9437	12.4581	4.99098	11.3994	77.9583	6.96266	2.70467		722.308	8.21239		717.326	17.7295	19.7572		718.453	1.89533	28.7338	18.5043	16.581	8.12549		721.613	12.8791		723.202	79.2015	16.6917		715.526	28.5415	23.171
463.41	7.99083		556.069	7.54082	84.1188		463.217	20.1572	10.9368	7.81946	11.2796	27.8743	14.19	6.87038	8.05692	12.8263	79.8139	20.9021	12.1391		723.984	8.35845		718.992	25.0552	26.5216		720.12	3.69869	24.7643	12.9747	9.65041	17.1826		723.287	12.7195		724.88	84.9294	11.0867		717.185	10.3652	20.5853
464.486	4.83125		557.353	2.63989	88.5575		464.293	18.5416	10.6039	7.77826	7.68663	26.9966	16.8195	5.91275	5.28067	16.4745	79.2684	12.0463	12.2884		725.661	7.9913		720.656	16.504	11.9568		721.786	3.08122	25.3431	16.5825	8.78986	15.7284		724.962	12.9601		726.558	100	11.5296		718.846	25.196	19.0091
465.553	8.23514		558.641	12.0492	83.4065		465.361	19.0233	9.42453	8.45175	7.79048	33.6135	20.5994	7.38119	5.31199	12.8957	83.55	10.9857	10.3381		727.337	7.03953		722.32	23.7136	27.7782		723.453	3.78543	15.8904	20.5137	11.8621	14.0812		726.637	17.1995		728.237	75.5784	14.431		720.507	30.7248	28.2616
466.629	4.81616		559.932	7.64016	84.5447		466.437	15.2601	10.7108	7.27694	10.3726	31.1641	14.3151	5.04416	5.20401	19.2035	79.8789	23.1116	0.0140132		729.013	6.64428		723.985	21.5135	23.984		725.121	2.15056	16.5927	20.664	8.69375	16.7313		728.31	21.7883		729.914	75.6117	17.9573		722.167	18.5048	18.9447
467.706	8.39411		561.212	4.25107	77.8298		467.505	17.8224	6.35843	9.18273	11.4843	17.6335	10.0836	8.75309	3.15882	13.9451	80.6583	19.0002	6.27396		730.687	5.53815		725.649	18.3904	38.8393		726.787	1.4328	17.8563	26.8028	11.3397	8.16018		729.984	34.3986		731.592	61.5658	18.4877		723.827	19.9533	31.1399
468.774	7.71828		562.504	1.15399	87.4248		468.581	15.3278	11.4272	11.0291	7.58669	18.6548	15.5438	5.73867	4.74074	15.9711	79.6164	14.6035	8.92749		732.363	8.02712		727.313	16.4407	48.6219		728.454	3.60328	13.2157	27.1262	8.5776	15.5271		731.659	23.0948		733.27	36.0491	17.3135		725.487	21.4017	18.2829
469.85	2.99537		563.788	4.39778	79.475		469.657	18.9286	9.39128	9.85374	9.26969	29.2662	12.9333	8.75154	3.7067	14.299	77.5062	4.35429	6.27944		734.04	7.76786		728.978	18.4807	62.3196		730.121	1.16508	10.5376	29.3148	8.62669	20.6221		733.333	26.8257		734.947	50.6507	16.5389		727.147	20.3875	22.453
470.918	6.83232		565.077	4.57883	83.0594		470.725	13.3166	13.1176	9.38514	9.18787	33.3742	16.6642	1.38271	4.45203	14.3407	77.3449	13.1497	8.10953		735.716	8.93535		730.642	20.0195	66.4753		731.787	0.885145	12.9897	35.1063	12.7016	14.5493		735.007	33.1804		736.626	47.385	18.0203		728.807	25.196	29.2434
471.994	7.64831		566.368	5.07508	76.9971		471.801	15.1677	8.88057	8.1937	11.3201	42.4433	17.0899	9.57633	5.67237	14.1213	80.3423	12.9192	7.5432		737.392	8.00471		732.306	24.4197	84.2995		733.454	0.259745	13.7937	39.0645	9.8613	12.5229		736.682	37.6007		738.304	41.8184	15.4604		730.467	8.91675	28.2078
473.062	7.49189		567.648	5.68514	84.2636		472.869	15.69	7.77332	11.2168	11.5687	23.3409	13.6268	6.99951	5.60984	13.8563	81.0363	13.8263	8.2379		739.068	6.23876		733.971	18.4993	72.8258		735.122	0.407404	6.53347	47.5129	9.99436	14.3255		738.356	44.5007		739.981	54.8604	19.1284		732.128	18.7698	16.3736
474.138	9.07655		568.936	11.9707	74.0623		473.945	14.407	9.65942	11.4424	11.7055	29.2364	12.3419	0.780629	3.29815	10.6878	79.4385	8.96378	7.36706		740.743	6.99934		735.636	24.8947	95.8734		736.789	2.35267	10.9085	48.7233	12.6775	13.097		740.03	24.395		741.659	43.6938	14.6009		733.788	19.1956	28.0948
475.206	4.68546		570.224	13.1794	83.3045		475.013	15.3733	12.2199	10.9958	13.6828	23.3562	17.5745	7.21968	3.55396	12.1528	81.1598	9.31285	12.9244		742.419	8.02765		737.299	21.8535	97.6131		738.456	2.7879	8.43664	58.7718	6.56625	12.5145		741.704	27.4892		743.337	53.896	16.9978		735.448	29.0926	24.8315
476.282	7.57967		571.504	6.7398	85.0185		476.089	16.614	9.50352	7.54725	9.78888	33.168	18.8488	6.55938	4.51373	12.8226	82.0501	7.12682	5.89766		744.095	7.39033		738.964	24.3939	97.3221		740.123	1.89565	12.8559	71.7744	9.5429	8.05611		743.378	21.5819		745.015	47.8934	15.395		737.108	25.0334	30.0778
477.349	7.27501		572.796	11.2502	86.5338		477.157	15.081	9.85465	12.7867	13.2813	37.7179	18.4326	4.59149	2.82276	10.2259	82.5033	12.281	14.6373		745.771	8.63383		740.628	23.6503	100		741.789	1.1924	10.0737	73.6296	10.4877	10.3185		745.054	24.5042		746.694	24.7277	15.5804		738.768	37.0697	28.6018
478.425	8.43279		574.089	9.09506	83.0701		478.233	13.6588	10.4107	11.41	16.1848	35.3947	16.8729	7.55256	5.01622	10.3386	84.3496	8.49834	9.04143		747.447	7.32641		742.292	23.804	90.5796		743.456	1.40369	12.84	74.4116	9.41064	14.3416		746.728	7.49637		748.372	43.6222	19.8044		740.428	18.9307	28.4473
479.494	8.06464		575.372	10.9276	82.2108		479.301	15.5667	8.7406	8.01336	16.0282	38.1178	16.4868	7.35691	7.19546	14.102	83.461	9.50438	13.4642		749.123	7.34946		743.957	28.4732	86.594		745.124	3.0708	8.40718	57.5527	9.91145	7.02608		748.401	14.4668		750.049	22.6213	13.0044		742.088	18.1586	25.0997
480.57	9.00675		576.66	12.909	76.6357		480.377	16.1983	9.39088	12.7514	14.2974	32.5176	14.3963	3.62619	4.72694	10.2535	84.9908	15.0952	10.7674		750.798	6.90492		745.622	20.4941	76.3283		746.791	4.0726	8.82119	57.1273	11.5032	14.2562		750.075	21.5096		751.727	26.2814	16.8845		743.749	17.1588	25.452
481.646	7.07905		577.94	10.2822	79.79		481.445	16.9463	9.24344	10.8084	19.5278	30.5557	15.9609	8.42208	3.38223	8.68374	82.7098	4.81146	10.6647		752.474	6.50829		747.285	26.7287	91.5457		748.458	3.55127	11.4356	51.5415	13.6345	18.3186		751.75	18.128		753.405	32.6618	16.1881		745.409	15.4683	24.8804
482.714	7.62318		579.228	14.4614	74.5436		482.521	15.2601	9.66418	8.25494	16.6208	29.8162	19.0353	7.99794	3.88077	12.5287	83.9923	5.89081	10.8971		754.151	7.4121		748.949	21.0389	83.0204		750.125	6.71156	9.34244	42.6853	9.6441	13.4134		753.424	15.9971		755.084	12.558	18.2734		747.069	25.8351	32.9122
483.79	10.3118		580.521	7.62962	73.0738		483.589	11.0842	11.1593	13.9699	17.2003	27.2578	15.1226	9.60455	4.66247	11.1347	84.6521	18.3749	13.4957		755.827	5.62864		750.614	19.7058	90.8214		751.79	2.91726	11.1819	38.8712	13.5579	18.9929		755.099	11.9544		756.762	20.4506	18.3351		748.729	23.8271	28.0023
484.857	7.60774		581.8	10.2148	73.7979		484.665	14.4344	10.4432	10.1005	16.1766	40.0579	15.6803	9.69609	6.24903	9.3813	85.7385	18.481	9.52971		757.502	6.87687		752.278	21.7192	72.9467		753.458	5.15644	10.5631	38.102	14.2398	19.2586		756.774	23.7768		758.44	14.9146	18.5698		750.389	20.7693	23.0054
485.933	8.95227		583.092	3.33667	70.0919		485.741	14.3228	8.05734	14.8959	15.8756	30.6977	14.3596	7.18375	6.00163	9.17413	84.4641	6.10107	8.92091		759.178	8.6069		753.942	17.8186	66.3124		755.125	3.78115	15.1212	30.6307	9.79933	39.259		758.447	3.52417		760.117	13.9201	17.208		752.049	27.7466	27.0257
487.001	10.9851		584.385	8.28769	74.2579		486.809	14.1315	10.4168	13.832	20.2474	31.8832	16.5342	7.585	4.50873	11.9301	82.0229	14.982	11.2416		760.853	6.57009		755.608	8.40889	58.2816		756.792	4.83646	10.2767	19.8388	8.8223	56.466		760.121	9.17294		761.795	13.2668	19.4847		753.709	28.8717	17.5747
488.078	10.6523		585.664	6.71381	59.0827		487.885	15.81	7.94897	8.61464	17.6874	29.7622	18.1557	0.376063	6.59947	8.89859	82.7483	9.22081	1.78313		762.53	6.95596		757.271	22.9632	49.0338		758.459	6.83316	9.7278	16.1045	4.3902	57.8875		761.795	21.1541		763.473	19.4475	19.5435		755.371	45.5767	19.2341
489.146	8.50206		586.952	4.24277	54.8641		488.953	15.3768	10.0751	13.1304	17.0413	30.7142	17.8034	8.32721	1.31564	10.2426	83.6206	11.8614	2.08925		764.206	7.88165		758.935	21.1998	46.3067		760.126	5.14649	8.26093	15.8832	12.833	50.2023		763.471	13.0228		765.152	27.4509	25.0029		757.03	18.123	24.8638
490.222	10.0626		588.244	1.69546	53.623		490.03	19.311	8.03051	9.34408	20.0031	28.8196	16.2419	11.3359	1.38502	15.5078	82.2436	10.1698	9.64147		765.882	7.48225		760.6	19.2945	29.9019		761.792	4.40196	13.7629	15.6582	9.76488	59.3055		765.145	13.6482		766.83	15.4959	19.9496		758.69	28.7252	23.5008
491.29	8.21271		589.528	2.17934	51.9091		491.097	18.1898	10.9001	11.7715	16.2996	33.0869	19.6667	9.31038	4.43934	12.804	83.9498	22.9835	11.6276		767.558	7.5102		762.264	19.2949	40.8925		763.46	6.31549	10.1798	18.5563	3.79757	51.2851		766.819	16.418		768.508	15.946	24.0312		760.35	20.6068	24.5662
492.366	8.73109		590.82	6.30362	54.4377		492.173	11.5949	7.9645	7.33658	18.0968	35.444	14.3802	10.6233	4.28119	15.0906	80.1532	14.2645	7.41031		769.234	8.54206		763.928	18.7755	41.4966		765.127	5.24525	10.2622	14.3621	10.6234	55.5244		768.492	12.6641		770.184	27.1842	26.0061		762.01	26.5631	19.1328
493.434	8.05285		592.112	6.11584	51.0671		493.241	14.55	9.45195	8.57859	19.4289	35.1809	14.0069	7.23734	4.45166	9.71202	82.6865	13.797	14.7942		770.91	8.24348		765.594	23.008	30.2641		766.794	5.49596	13.3424	12.9061	10.0096	50.4561		770.167	6.42472		771.862	17.2354	25.4753		763.67	10.8139	23.9746
494.509	7.88604		593.397	1.45539	50.3264		494.317	18.052	6.95902	11.225	19.8922	35.8161	18.5171	9.25714	3.05123	11.7428	81.8071	15.4089	9.5648		772.585	9.81532		767.257	23.6237	27.8487		768.461	5.18732	12.472	13.1373	5.32469	48.3454		771.841	20.859		773.541	20.634	23.5396		765.331	40.7615	19.7366
495.578	7.61137		594.684	5.41244	44.7164		495.385	12.5049	7.60304	8.2737	21.8132	34.6204	26.3774	10.5343	5.26794	9.04891	85.532	10.6771	9.29068		774.261	6.61303		768.921	25.6827	19.7572		770.128	5.73375	9.45054	6.80013	9.95481	48.4476		773.516	11.4735		775.219	23.3073	28.4007		766.991	27.4817	13.9452
496.654	10.2752		595.964	2.50777	50.7915		496.461	13.3026	10.5228	15.7899	17.741	29.7962	22.1883	8.50662	5.62945	11.6807	81.9302	14.4887	6.56908		775.937	8.98182		770.586	24.1701	39.3734		771.795	2.85584	11.4084	4.90764	8.23881	37.5958		775.19	19.1054		776.897	10.9383	31.719		768.651	20.953	21.083
497.73	10.9916		597.253	5.58502	50.6662		497.529	15.5363	8.37438	7.11837	20.0129	37.7894	21.3014	12.21	2.25952	12.825	81.5182	16.3168	9.39972		777.613	8.40076		772.25	25.9403	29.2287		773.462	5.77654	14.7619	6.40702	7.63906	51.424		776.865	16.4612		778.575	0	32.3662		770.311	24.7473	17.9675
498.797	10.4957		598.545	3.99802	47.338		498.605	10.027	9.05559	9.90681	20.6136	23.1402	19.7114	10.0054	4.35822	11.6782	84.7952	12.6524	12.5623		779.289	8.85865		773.915	20.905	43.0667		775.128	6.58336	18.1039	6.47895	16.6125	56.3955		778.538	8.45891		780.252	14.7259	31.9295		771.971	16.7914	26.0316
499.874	12.3534		599.824	10.9112	48.2529		499.673	14.5599	9.02739	12.2138	18.8246	24.4174	22.1055	8.23411	4.77013	10.2485	85.9309	9.46741	11.9302		780.965	8.607		775.58	20.9752	16.9092		776.795	9.09252	13.727	11.3506	13.5527	43.8101		780.212	13.9097		781.93	14.3675	27.9723		773.631	45.9213	27.7053
500.942	11.9246		601.112	10.102	48.2885		500.749	12.3448	8.11444	11.0336	21.2627	23.16	20.2574	5.95017	0	8.75552	84.5809	14.3624	14.7502		782.641	8.32294		777.243	30.7446	37.5918		778.462	6.42127	15.496	7.4501	8.35271	51.2688		781.888	15.9757		783.609	14.5282	31.1543		775.292	55.5094	30.9889
502.018	12.3369		602.405	4.54509	49.0084		501.825	17.0172	9.57292	8.22652	22.3153	23.4631	15.4143	9.35517	4.26868	9.24881	84.8186	13.8086	11.7307		784.317	8.62979		778.907	17.5053	24.8299		780.129	7.3514	13.1437	6.90205	9.31939	49.1665		783.562	12.8516		785.287	14.0622	36.4705		776.951	52.6353	20.1105
503.085	7.02745		603.689	3.63585	52.2791		502.893	19.9269	9.94049	4.53111	29.8364	24.0092	16.2242	9.88827	5.14653	8.55998	84.7908	14.7681	6.92304		785.992	8.20271		780.572	24.5992	39.4433		781.796	6.90093	15.0652	8.94895	12.2762	55.506		785.236	12.32		786.965	21.679	37.4258		778.612	50.7427	37.3647
504.161	11.035		604.976	8.78424	48.9164		503.969	13.2719	10.7119	9.74602	31.7717	30.7118	16.5942	9.11374	5.90739	11.6261	84.2289	13.1383	10.292		787.668	7.47699		782.236	24.0987	24.3468		783.463	6.4334	11.6974	6.69999	11.0201	53.3039		786.91	12.5515		788.643	23.0206	44.8739		780.272	51.3477	28.8255
505.23	10.484		606.269	4.47002	54.0105		505.037	17.2601	9.06843	8.40917	34.0977	28.0906	16.546	9.01541	2.43007	12.8702	84.0448	11.2451	9.48766		789.345	8.65054		783.901	28.7687	40.4101		785.13	4.74579	9.94292	7.18658	10.6326	31.3329		788.584	10.648		790.32	30.9385	49.3756		781.932	40.5177	30.9267
506.306	12.4558		607.552	9.81645	45.2039		506.113	10.5396	10.6585	10.8978	37.216	25.8185	22.6664	9.53268	5.4425	12.3625	85.9925	16.0004	10.8505		791.02	9.21883		785.566	37.9083	30.7983		786.797	4.07251	8.77683	5.96895	4.69687	26.2527		790.258	18.2815		791.998	26.5867	50.6509		783.593	29.5625	25.7413
507.374	10.3611		608.844	7.1509	45.5886		507.181	9.52127	10.1365	9.61649	33.4634	26.8997	21.3957	8.50481	5.00168	8.84569	86.9585	10.461	14.2588		792.696	8.31836		787.229	25.4141	14.6858		788.464	4.62886	13.4036	8.67457	11.7622	32.0929		791.933	14.873		793.677	31.2	56.9383		785.253	18.6072	28.6101
508.45	13.3933		610.129	7.06823	46.438		508.257	11.7697	7.28474	9.21329	42.1217	22.4784	16.9818	6.84798	3.4076	12.0772	86	13.9389	7.07681		794.372	9.9272		788.893	25.5037	29.2281		790.131	3.41704	6.48708	5.39439	10.8041	28.2166		793.607	26.1606		795.355	13.77	61.3913		786.912	15.2617	30.4197
509.518	11.6553		611.421	10.9033	47.2756		509.325	16.6699	8.46196	10.3072	44.6314	29.3742	14.171	5.57033	5.58065	13.151	83.62	13.8689	11.3823		796.048	8.18477		790.557	24.8943	28.9364		791.798	4.36903	11.9625	3.28912	12.7037	22.6485		795.282	21.5484		797.033	29.5162	61.7335		788.572	19.9305	34.1391
510.593	10.319		612.712	12.7154	50.2875		510.401	12.0166	10.6628	10.5563	50.1128	33.5021	19.5214	5.10845	4.85143	13.8437	89.8412	9.93383	13.331		797.724	6.70677		792.222	22.3543	18.6707		793.465	4.92558	13.6263	5.98942	9.67856	25.0756		796.956	17.1407		798.711	24.5389	70.2489		790.232	24.2173	29.5482
511.662	14.7983		613.992	12.2938	50.7001		511.469	12.2646	7.99052	13.0564	59.1711	26.2241	20.1009	10.4921	6.68101	12.3369	90.6926	10.0763	6.52645		799.4	8.99273		793.887	27.2029	29.5398		795.132	5.15932	14.21	10.3027	20.9638	36.4328		798.629	16.1447		800.388	27.4455	69.2341		791.893	16.7914	28.3531
512.738	12.7085		615.28	12.693	49.0131		512.545	7.87172	12.5851	10.6413	63.1498	31.5844	12.6431	7.93679	6.11811	9.30787	89.149	16.0592	9.81629		801.075	9.38297		795.551	28.9736	27.9702		796.799	7.03351	11.9222	7.08882	15.7035	26.5958		800.303	18.1938		802.067	25.778	73.329		793.554	35.2539	33.7136
513.814	10.8688		616.572	5.43525	55.2895		513.613	12.6149	7.49873	8.69081	76.3145	22.7245	11.4549	8.12194	5.67727	15.301	90.2986	13.8616	9.43903		802.751	7.56907		797.215	13.6506	25.2425		798.466	5.30346	10.5634	5.28182	12.5723	23.5832		801.979	17.8672		803.745	24.1912	70.9236		795.214	22.2178	37.403
514.881	13.1382		617.856	8.26784	50.6207		514.689	13.0501	6.88344	9.50228	83.2849	24.7187	14.2651	4.85727	6.42047	13.7678	90.2268	11.3149	11.4284		804.427	8.48762		798.879	13.1043	11.1109		800.133	7.71258	8.71189	8.6882	13.3516	21.6494		803.653	7.20645		805.422	39.9314	76.4158		796.873	13.1225	30.6126
515.957	12.0933		619.149	0	49.4909		515.765	9.0096	10.0242	8.85741	80.9767	19.746	8.71787	4.50774	4.55406	6.89705	91.6312	7.57056	12.5094		806.103	8.12277		800.543	15.9137	26.3077		801.799	6.07357	8.81758	7.0382	12.8583	22.7179		805.327	13.5488		807.1	17.9274	80.7032		798.533	26.1145	30.0685
517.025	12.1759		620.441	9.78893	56.1085		516.833	10.0614	10.2745	10.3003	90.4294	25.4918	13.7421	9.82996	5.85761	13.4201	90.7796	6.31608	11.6315		807.78	9.17918		802.209	13.7402	27.6075		803.466	7.88859	11.7738	11.0463	9.48232	20.7327		807.002	3.74744		808.778	24.8301	76.8261		800.193	23.8499	26.6174
518.101	10.7178		621.724	10.2401	56.5355		517.909	13.6776	9.32607	5.87164	95.3043	26.355	14.022	5.42744	4.49742	8.96601	95.7125	22.8958	18.846		809.456	8.40827		803.873	16.7101	35.8703		805.133	8.22028	15.8361	10.355	13.6956	12.744		808.675	23.1282		810.455	26.067	75.7028		801.854	18.4235	27.6662
519.17	13.004		623.013	14.2809	55.8343		518.977	11.2515	10.3152	11.7046	96.7865	27.525	14.8835	7.01489	5.35673	11.1356	94.3421	13.4104	20.4251		811.131	9.74187		805.537	22.8551	30.2654		806.8	10.8349	11.2137	10.6485	13.8995	17.9824		810.349	1.07643		812.134	29.7906	72.5509		803.515	35.7025	24.5712
520.245	14.9426		624.304	10.993	47.42		520.054	13.0471	6.76366	9.69228	99.8154	25.3576	17.9002	10.1343	4.48661	8.42213	94.4457	14.1688	11.3318		812.806	9.09566		807.201	17.8642	34.0583		808.467	8.6675	10.5711	10.1731	9.25112	25.5422		812.024	16.2922		813.812	23.2241	76.6507		805.175	18.6885	30.7101
521.313	14.9021		625.589	8.44346	45.6039		521.121	11.2552	9.84526	11.7705	95.2045	30.8968	19.2127	7.66912	5.9186	11.1481	93.9634	16.0128	15.3075		814.482	10.6472		808.865	17.5242	27.7782		810.135	10.6465	12.8044	9.73058	15.629	27.7138		813.699	21.1327		815.49	15.982	78.9185		806.834	30.5411	22.4863
522.389	13.956		626.88	12.1851	42.3483		522.197	10.7199	10.8615	11.0507	97.2728	27.5042	17.7552	2.03379	5.44672	10.5675	96.0702	10.9622	15.4432		816.158	10.6291		810.53	22.6946	21.4489		811.801	11.6529	10.6589	9.83883	16.6828	25.5506		815.373	22.5327		817.168	16.9406	76.147		808.494	23.9312	26.9818
523.457	9.49681		628.165	7.41069	45.2432		523.265	12.0598	10.339	13.0105	96.0299	27.0248	19.5522	8.9663	6.27179	6.92114	98.8236	6.91931	15.6019		817.835	10.5498		812.195	17.2097	27.5363		813.468	16.9137	13.368	9.99307	5.18248	22.35		817.047	18.9227		818.846	16.9576	76.8728		810.154	39.7829	24.4387
524.534	12.2268		629.457	13.3105	42.6769		524.341	14.015	11.2873	11.2428	89.6362	22.7396	16.375	3.80538	6.83348	10.9169	98.8449	19.5076	13.9557		819.511	10.4228		813.859	17.3	30.2441		815.135	15.4511	14.1569	12.6534	13.9635	16.4176		818.72	8.85261		820.523	18.4889	77.9786		811.815	33.6886	25.2827
525.601	12.8826		630.744	8.79053	33.1958		525.409	17.6034	11.6582	9.81305	89.511	25.5927	19.2999	8.08432	6.67527	7.58799	97.7538	21.4709	15.6372		821.186	10.352		815.523	19.9562	26.5216		816.802	17.4692	17.5862	9.01022	23.2689	14.2478		820.396	6.98342		822.202	17.3357	71.9895		813.475	32.092	12.9567
526.677	15.9287		632.024	9.85005	33.6946		526.485	5.62387	8.80588	11.9695	88.6684	43.2086	18.0065	6.47811	7.01563	9.16666	95.5359	8.10278	11.8171		822.862	11.1115		817.187	25.9331	16.9092		818.47	19.5866	16.1723	11.4164	26.5713	16.2632		822.07	12.7899		823.88	20.0732	74.2906		815.136	27.1955	14.3224
527.746	15.4734		633.312	12.2768	39.4645		527.553	10.1666	8.43191	9.31858	82.6463	31.8663	17.7614	7.15906	8.19626	6.27985	100	15.1837	18.62		824.538	13.5676		818.851	18.7941	18.9618		820.137	21.5321	17.7632	9.25395	49.1256	18.9948		823.744	14.3491		825.558	29.6911	65.069		816.795	29.8275	25.8483
528.822	13.0975		634.604	14.9396	40.7786		528.629	9.00012	9.06651	7.65083	74.3683	34.7716	9.95825	10.3826	6.73358	7.48484	98.7405	14.6633	17.4079		826.213	16.7058		820.516	25.7081	13.5269		821.803	29.2313	18.5608	14.7506	79.7551	18.1772		825.418	19.6471		827.236	27.4706	66.5887		818.455	25.7471	20.3781
529.898	15.3002		635.888	7.92631	37.7339		529.697	10.0606	6.5479	7.53957	77.1431	36.7852	15.3129	8.30581	6.04055	12.2089	96.3107	12.8715	8.42188		827.89	17.0476		822.181	25.7984	23.8637		823.469	34.6453	16.2694	16.151	100	18.1425		827.093	10.2494		828.914	16.5238	66.8181		820.115	53.9813	22.9733
530.966	18.5152		637.176	3.59631	41.4995		530.773	10.4139	7.86279	7.69421	71.9847	25.5827	13.7165	7.20163	8.65341	3.8689	95.618	7.88972	15.3946		829.566	18.0982		823.845	28.0695	28.5038		825.136	45.455	19.0963	10.1247	89.5476	5.87342		828.766	16.7832		830.592	17.4437	67.2034		821.776	30.5183	26.4959
532.041	19.0798		638.469	9.33506	49.114		531.849	5.67433	8.60466	8.17153	65.4582	25.5332	15.261	5.34436	7.90371	8.24616	94.9543	13.7767	13.0478		831.241	23.8342		825.509	26.5489	24.3468		826.803	51.4549	21.8976	9.4758	86.629	16.9917		830.441	20.8615		832.27	11.2217	64.373		823.436	29.0926	26.221
533.11	20.1413		639.748	7.01417	43.8346		532.917	1.67673	8.53468	10.1983	58.4085	21.1486	17.702	5.00707	8.07679	9.7085	95.9073	16.2727	16.9102		832.917	28.3237		827.174	33.0532	20.1206		828.471	53.6827	20.3501	14.2253	75.1425	15.351		832.116	9.84055		833.948	19.2888	60.8615		825.096	27.4377	25.1081
534.186	20.9479		641.036	11.1248	52.3322		533.993	6.82045	6.8715	9.2071	51.2327	29.3543	15.4128	7.84845	7.70087	5.67965	94.8683	7.54801	17.895		834.593	43.4525		828.837	28.5631	23.5313		830.138	53.0576	19.3968	8.90989	52.5367	6.52793		833.79	18.3478		835.626	15.2959	57.9187		826.756	40.4737	25.3412
535.253	21.441		642.329	2.62141	58.0788		535.061	0	5.75658	11.3497	48.827	33.9071	14.0802	8.99355	6.82889	11.7547	93.9708	11.0545	12.2072		836.27	59.9291		830.502	26.2085	23.5009		831.804	54.1996	20.6176	15.0203	41.2979	8.86426		835.464	22.5975		837.304	18.7804	56.5876		828.416	39.1294	22.831
536.33	20.6934		643.613	7.90177	53.8976		536.137	4.07599	5.13581	8.97635	51.576	25.8894	14.3589	10.051	6.5733	8.41117	91.5198	15.8306	11.7849		837.946	69.3371		832.166	26.4589	20.1698		833.471	59.4127	20.3401	13.1311	39.7911	21.9117		837.138	20.0395		838.983	28.6433	52.2363		830.076	44.7462	28.6018
537.397	21.4457		644.904	7.03327	51.6352		537.205	7.32315	6.13498	10.6394	38.3112	34.9351	15.271	9.54655	6.57712	7.66586	89.9658	6.97789	14.131		839.622	76.1034		833.831	32.0068	23.9135		835.138	64.9657	19.1995	15.2859	33.4275	16.9897		838.813	13.8831		840.659	26.5283	52.4311		831.737	27.7466	29.203
538.474	22.4407		646.188	5.08985	52.0882		538.281	8.49324	8.77835	8.03758	40.2079	25.8546	13.5108	8.80884	7.9574	11.6867	89.0758	8.06911	16.7513		841.296	80.5656		835.495	26.2731	19.0329		836.805	62.5751	20.9472	16.8395	22.1958	16.647		840.487	14.9691		842.337	36.6133	50.1396		833.397	30.5183	24.3185
539.542	23.2317		647.481	6.67148	53.4971		539.349	3.87575	3.97738	10.767	33.052	19.4356	17.9369	5.90935	8.78691	10.7894	91.8949	9.55372	13.0941		842.972	80.551		837.159	40.3334	30.1451		838.473	61.577	19.3043	13.749	16.9826	18.1966		842.161	2.72623		844.015	19.4198	47.0467		835.057	23.0339	30.3376
540.618	24.6193		648.773	9.89795	53.7004		540.425	4.88075	4.09723	7.97737	29.9528	23.7276	16.7023	6.65257	8.57779	9.32955	88.3226	5.36825	10.5907		844.649	75.5222		838.824	27.6582	29.4189		840.14	66.8428	19.0804	18.8188	11.0141	14.6123		843.835	13.5706		845.693	28.8294	44.7183		836.716	33.6073	27.9603
541.685	22.6784		650.052	3.6673	62.5401		541.493	0.433475	7.05664	11.2604	31.084	23.6282	14.8022	5.97432	6.48203	8.61694	90.1805	18.642	22.5606		846.325	76.3505		840.488	30.8979	33.9884		841.806	69.1647	19.3081	20.807	9.26114	14.9999		845.51	15.2492		847.371	8.18685	40.3626		838.377	31.3572	29.7271
542.762	22.2436		651.345	6.15203	64.7832		542.569	2.33835	7.04844	8.73196	26.2828	37.6307	9.77789	9.37938	7.26613	9.52964	90.1849	7.58937	14.5109		848.001	74.0251		842.152	29.5643	43.5504		843.473	65.6294	17.7969	24.6008	10.2365	32.8173		847.184	21.8774		849.05	22.4513	40.3917		840.038	16.0566	21.427
543.83	25.058		652.636	5.60654	57.8083		543.637	5.29658	4.84751	10.9074	24.4357	23.3154	12.6681	10.2576	7.81186	9.11444	89.8252	16.6418	18.9479		849.677	68.7011		843.817	26.0742	30.1438		845.14	60.5965	22.2187	27.6338	14.3051	39.135		848.858	18.9227		850.727	26.9536	37.0733		841.698	28.1953	32.1577
544.906	26.2246		653.921	5.7605	60.2222		544.713	0.437134	4.5017	12.9395	20.5909	19.979	8.85353	7.44189	7.27823	5.52181	87.2947	20.8955	22.2391		851.352	67.7301		845.481	28.0433	23.8637		846.808	54.5121	24.341	32.8487	11.7875	46.4082		850.532	13.6486		852.405	24.5051	37.3215		843.358	33.2543	35.8802
545.982	25.454		655.212	7.97666	68.6906		545.781	2.54183	4.87906	10.7569	24.0293	21.4206	9.56243	9.95938	7.70969	11.6915	87.6067	11.7458	24.2938		853.028	63.4637		847.145	29.7172	28.5736		848.474	50.9412	20.8658	41.3376	11.5141	24.5233		852.207	10.5663		854.083	22.5125	35.3253		845.018	22.8274	24.3147
547.05	23.1981		656.505	6.28097	69.8437		546.857	3.37877	4.61141	9.13263	17.0074	30.2548	9.57409	6.58068	7.29928	8.46363	84.2789	13.2275	18.9746		854.704	60.3782		848.81	22.1035	19.5153		850.141	54.7044	30.0363	46.2152	9.0543	20.9754		853.881	11.7734		855.761	23.2103	36.7755		846.677	20.8278	24.2471
548.126	25.0253		657.784	11.1697	65.2077		547.933	5.08492	2.90054	7.83854	18.089	27.5206	9.61995	7.78484	7.24467	7.18984	85.2202	11.6078	21.0805		856.38	54.1496		850.474	24.5092	37.6817		851.807	58.3978	26.8509	61.3387	10.1619	27.6364		855.555	9.05044		857.44	24.889	36.7729		848.337	46.7975	23.0935
549.193	21.8168		659.072	7.18973	63.3285		549.001	9.52894	4.36986	11.3997	15.4115	28.9595	10.1856	8.08749	10.7041	8.5778	84.2911	11.619	12.0183		858.056	50.988		852.138	25.1819	5.74718		853.474	51.8637	23.0421	73.2987	7.96579	42.1115		857.23	25.8916		859.118	23.3353	33.6847		849.999	18.6885	23.1379
550.27	22.3802		660.365	6.50944	61.0948		550.078	5.99996	4.66519	6.90829	9.72046	30.7294	21.465	8.54775	9.77965	6.79931	83.929	10.4649	19.531		859.732	44.1956		853.803	29.3773	16.4054		855.142	55.8789	31.0999	74.9072	8.6275	35.9452		858.904	17.2647		860.795	38.3974	31.9926		851.659	29.0114	21.7949
551.338	22.5759		661.644	12.0241	65.2465		551.145	8.14513	5.29504	10.8429	10.8372	17.0561	16.0534	8.17853	8.60726	8.06298	82.4266	13.3452	13.4057		861.407	44.0881		855.467	31.2636	20.9659		856.809	55.0801	25.6233	66.2838	9.1932	35.8557		860.578	12.4353		862.473	21.0454	33.5831		853.319	31.5993	18.947
552.414	22.9274		662.937	10.8247	64.716		552.221	8.17502	7.66733	12.6223	9.47542	31.7485	14.6894	12.1851	6.6583	13.753	82.695	13.6789	19.1098		863.083	41.7108		857.132	31.0584	28.6952		858.476	62.7214	29.4496	61.6524	9.52939	23.4483		862.252	21.3894		864.151	24.4165	26.1214		854.979	37.5768	23.8531
553.482	17.7386		664.221	9.567	62.4187		553.289	4.74286	6.91045	13.2694	11.0674	26.9931	10.3531	10.1208	6.40439	11.144	81.8937	17.198	17.2767		864.76	42.2089		858.796	33.1939	33.7672		860.143	62.5581	28.715	62.9445	10.9783	18.6993		863.927	10.2278		865.829	5.7167	28.785		856.638	12.6153	22.3506
554.557	19.9868		665.513	7.53545	63.9918		554.365	7.12291	7.26473	8.26652	10.9886	24.1351	12.1996	6.1564	6.68405	7.1573	82.5175	14.5096	18.8896		866.436	34.8574		860.46	28.5437	19.7372		861.809	68.4863	24.7646	55.1971	6.43399	25.8605		865.601	29.5849		867.508	36.344	28.7607		858.299	23.2176	18.1126
555.626	18.4086		666.8	4.38735	61.6075		555.433	13.9282	4.98097	13.6398	9.25006	30.9853	13.5167	3.56044	8.93001	10.977	80.5395	11.8116	18.3356		868.111	32.6918		862.124	28.1142	30.1238		863.476	67.2644	30.9348	52.5826	12.4633	25.8272		867.276	21.2197		869.186	34.6293	24.7741		859.959	25.7243	22.6664
556.702	18.1493		668.081	14.1979	64.48		556.509	8.16982	6.06571	11.5706	9.63943	32.883	10.893	11.3481	11.2087	8.6944	79.6066	8.78549	16.5212		869.787	32.0358		863.789	23.8741	31.7638		865.144	61.6237	25.4128	46.2008	11.8557	22.5925		868.949	18.1731		870.863	36.5216	25.0645		861.62	25.9892	22.678
557.77	15.8952		669.368	8.45054	67.5527		557.577	9.46006	8.5407	9.4551	10.017	36.388	12.1279	10.9937	7.22897	11.9329	80.3498	7.75437	18.82		871.462	26.4607		865.453	26.7287	21.6902		866.811	52.0065	31.9075	44.105	4.06751	15.7844		870.624	22.1264		872.541	40.6875	20.1265		863.28	26.7468	21.6008
558.845	15.2891		670.661	8.65511	63.936		558.653	9.24932	9.19002	7.80842	10.6287	29.6543	11.6011	5.52954	8.60949	9.83319	74.6641	9.89744	21.3064		873.139	22.7415		867.118	18.7941	14.3224		868.478	47.1226	24.4827	39.0309	8.14263	20.1147		872.298	11.0691		874.219	43.611	20.7319		864.94	29.0926	26.8827
559.914	16.5244		671.944	14.7834	72.2967		559.721	9.61505	9.0037	10.8623	8.79471	28.6401	13.7268	9.48891	9.38646	9.64958	73.9123	13.0875	12.9297		874.815	19.8303		868.782	25.369	18.6003		870.145	39.5376	20.8405	24.6823	8.4861	28.3272		873.972	32.349		875.896	41.3904	19.0669		866.599	23.6662	28.0307
560.99	15.6106		673.233	13.5005	61.653		560.797	14.7609	9.75527	12.3157	8.30829	27.0885	11.5351	10.05	10.0467	6.28983	73.3524	9.82791	19.5359		876.491	17.2985		870.446	19.0711	32.3186		871.81	37.9236	28.8792	23.1727	11.0141	32.3586		875.647	6.25061		877.575	49.9503	14.0569		868.26	25.9308	28.327
562.066	10.9925		674.524	12.1958	62.8996		561.865	7.71764	9.85002	9.14662	8.23991	21.4654	10.3307	9.57764	8.84955	10.2568	72.9966	16.0239	13.3781		878.167	15.6115		872.11	17.6138	14.6845		873.477	30.2221	23.2498	19.9622	7.41127	24.2922		877.322	22.9521		879.252	77.4953	17.6423		869.92	30.967	29.7343
563.134	13.8928		675.804	12.8734	70.4465		562.941	14.6164	10.0354	8.29024	4.62334	27.4541	11.4676	12.2787	10.5193	7.74157	70.9293	9.54138	12.2314		879.843	15.2528		873.774	23.6951	20.4621		875.145	25.6069	18.7885	23.7467	6.06915	25.867		878.995	27.3495		880.93	65.1289	17.34		871.58	17.7912	23.7042
564.209	15.4332		677.092	12.2773	60.4731		564.017	12.6266	8.41327	10.5364	4.9703	28.2052	15.6974	10.7762	7.76006	4.39499	68.9001	21.2642	19.1776		881.518	12.812		875.44	27.4538	22.7068		876.812	19.2893	21.9414	25.3912	10.3406	28.1427		880.669	32.9879		882.608	69.142	10.4083		873.241	33.3212	26.8589
565.278	12.3265		678.372	14.7586	66.4737		565.085	12.154	10.9656	8.46056	6.89182	23.5475	10.7531	14.1446	10.1785	7.46615	64.2648	16.1167	17.4601		883.194	12.7163		877.104	19.7505	23.0689		878.479	17.1443	21.4159	24.553	11.1733	16.8909		882.343	26.1867		884.286	90.6599	10.371		874.901	16.8938	26.3613
566.354	14.4148		679.66	17.7677	60.5093		566.161	11.4503	9.68154	8.9783	2.59024	29.1832	16.1428	13.3707	8.15613	8.83878	67.4974	21.1868	21.1042		884.87	10.301		878.767	17.1839	29.0561		880.146	13.2782	24.2204	18.9838	13.3226	10.1904		884.018	22.3617		885.965	78.4152	16.1354		876.56	32.9893	21.9007
567.422	13.628		680.952	9.71075	57.7906		567.229	12.7359	13.0957	10.2295	8.3403	24.9149	16.1271	12.4532	8.79837	8.38582	65.3703	7.73808	20.2208		886.546	10.9912		880.432	17.9609	26.3296		881.812	14.6154	18.7997	12.019	7.06674	5.98998		885.693	14.8873		887.643	56.1309	13.0069		878.221	24.3782	36.4172
568.498	9.60977		682.237	9.56724	45.4024		568.305	15.837	10.9141	7.10468	3.59586	19.9484	15.0242	9.32988	6.55885	9.58945	61.3989	14.2645	17.1997		888.222	10.1423		882.096	24.0987	32.3678		883.48	10.4816	18.3351	11.3994	6.85512	14.9133		887.367	19.6354		889.32	60.2849	11.4726		879.881	22.4828	23.8581
569.565	11.3044		683.529	14.8931	45.7764		569.373	15.4079	12.6628	12.9884	5.81609	27.0257	8.56612	11.7487	6.54535	6.54091	60.2572	6.88393	16.2382		889.898	8.52323		883.76	16.6205	23.3606		885.147	9.42691	23.1067	7.77645	7.75288	15.5469		889.041	18.7182		890.998	51.5562	12.2514		881.541	43.3122	31.1554
570.641	10.7098		684.816	16.1108	50.458		570.449	9.19764	14.279	12.2097	7.14308	33.0814	15.2537	13.0105	10.8387	12.7859	58.5832	17.8211	20.6702		891.573	10.3687		885.426	21.3793	18.5498		886.814	8.72061	26.5967	11.3021	6.50509	7.30816		890.715	32.4855		892.676	48.6386	14.2682		883.201	35.5188	25.4615
571.71	9.08572		686.097	12.2004	48.3793		571.517	18.9995	11.7632	4.85605	3.43111	22.1371	11.1343	13.2034	9.64558	7.76917	53.1815	17.175	18.4752		893.25	9.33896		887.09	18.5702	35.2165		888.481	8.6743	20.7118	5.25324	11.6667	11.2814		892.389	20.0796		894.354	39.8455	10.7874		884.862	35.805	27.2804
572.786	10.5805		687.384	11.6985	43.386		572.593	18.404	12.323	7.20962	7.59099	18.9902	14.1472	8.70451	8.40801	5.91415	51.372	14.1666	18.5408		894.926	8.08652		888.753	17.3448	25.0006		890.148	7.90861	21.794	9.74502	10.274	4.1458		894.064	25.8878		896.033	28.8267	12.3165		886.522	44.312	23.7496
573.853	9.13504		688.676	15.1562	47.3775		573.661	14.564	8.82356	9.51052	7.6004	34.504	15.7845	8.25388	6.52457	9.84772	49.0786	16.579	15.7607		896.601	7.30352		890.418	22.1934	17.5125		891.814	5.54782	20.0918	12.1682	9.19408	8.12549		895.739	20.3867		897.711	25.4084	11.1046		888.182	29.5413	25.7628
574.929	10.7305		689.956	12.6968	41.9565		574.737	11.742	11.5119	10.4947	5.1041	30.3517	16.7459	8.76847	7.90429	7.80747	45.7243	21.979	16.0134		898.277	6.16254		892.082	29.4934	31.5937		893.482	4.88509	18.7527	9.61661	10.2049	10.0284		897.412	16.8391		899.388	32.053	8.51558		889.842	35.3123	21.0853
575.997	7.45979		691.248	9.71209	45.6112		575.805	16.9103	9.48873	9.32441	3.32663	24.4772	20.6177	7.67282	7.2499	8.5303	48.4514	15.6314	17.0144		900	8.20654		893.747	28.0885	28.2619		895.149	5.84791	20.7306	9.33312	9.28469	4.54761		899.086	16.7416		900	27.8596	11.3347		891.502	29.6438	28.7065
577.073	7.17625		692.54	10.963	44.056		576.881	10.3991	9.08351	10.4247	8.37568	26.2255	13.8811	15.0399	10.4861	9.2231	44.878	27.0228	16.1803					895.412	18.7493	11.8365		896.815	7.17185	23.8904	5.43586	8.86218	9.38038		900	19.5865						893.162	29.3788	31.9462
578.15	10.3837		693.82	10.9407	40.3234		577.949	7.89556	8.44188	10.5877	6.00099	28.636	13.6724	11.1707	10.5976	8.40767	41.7872	21.6006	24.4427					897.076	25.8876	12.7315		898.482	4.93376	23.1829	3.60672	5.84969	6.47836									894.822	76.3404	33.9849
579.218	7.85538		695.108	10.0393	41.5028		579.025	11.7355	10.3538	8.8128	9.15514	24.5597	14.7733	12.4407	7.96883	6.83472	41.0943	13.0894	18.3206					898.739	31.3269	29.9019		900	5.72834	19.741	8.5016	4.73472	0									896.483	99.5953	24.3496
580.293	9.83875		696.388	14.4417	45.5213		580.102	11.205	9.15548	10.0477	8.52559	18.8147	23.1871	8.35246	8.021	7.81349	39.9931	8.04889	19.9888					900	24.0604	19.6369																898.143	48.841	22.94
581.361	8.89151		697.681	8.24618	40.2407		581.169	13.2394	10.2639	8.78022	8.08177	27.923	18.6775	11.1219	10.3756	7.61185	38.1591	4.5476	17.1668																							900	100	30.1366
582.438	9.61155		698.973	5.20324	50.1956		582.245	12.0736	10.905	8.7371	5.39314	22.6632	13.8812	9.35748	8.29954	7.60846	40.9976	8.11281	24.135
583.506	10.3135		700.257	9.988	48.2159		583.313	14.8804	10.3318	8.13145	5.53455	32.5942	15.103	7.56063	11.4586	7.1862	37.1357	14.6207	20.5499
584.582	7.37168		701.544	16.4062	44.6853		584.389	13.1137	6.95785	10.4847	4.60303	31.106	20.6542	9.28117	9.49301	7.54923	33.6544	9.15274	18.765
585.649	10.1072		702.832	16.0212	40.684		585.457	11.9878	10.519	11.0938	7.53195	33.1927	21.2873	6.99116	11.6388	6.99061	33.6876	14.6278	12.8379
586.725	10.1341		704.113	6.49348	35.5692		586.533	16.0675	10.8014	8.18404	5.64703	23.7649	21.0119	9.85749	9.19994	8.88921	34.3349	13.9067	19.3137
587.794	5.20654		705.401	7.54713	30.6049		587.601	15.542	7.16861	10.7423	8.51624	26.7568	20.8751	9.06062	10.2522	7.96223	29.8044	14.7898	20.3159
588.87	9.94965		706.693	10.7721	32.9069		588.677	18.5882	10.7687	10.5321	9.27032	27.7483	21.8046	11.9307	9.91488	8.78991	30.5593	2.2954	20.1095
589.938	6.52695		707.976	11.477	34.3118		589.745	15.8267	10.2957	12.6291	4.07297	34.6131	22.7251	10.2072	8.8629	5.96107	29.1732	16.5675	14.2965
591.014	7.69017		709.264	8.88755	35.8633		590.821	14.4824	11.0097	10.1366	8.49493	34.4264	24.6967	9.40751	12.5303	10.5408	30.9609	21.7804	10.3083
592.082	8.30409		710.556	3.97979	26.9719		591.889	11.1969	12.402	8.79134	8.33274	18.7562	26.601	15.9211	9.57366	7.01037	27.5711	10.7881	17.306
593.157	6.3756		711.84	12.0344	33.9933		592.965	12.6104	9.34648	10.3302	8.44641	28.2171	21.0618	9.01544	12.944	8.27796	29.944	9.47171	16.8037
594.233	6.64179		713.128	7.19121	24.7654		594.033	16.028	11.1508	8.67025	5.13187	31.9441	21.0261	10.1835	12.3121	7.62782	24.201	7.95546	19.4541
595.302	7.2407		714.408	10.7024	14.9593		595.109	15.6546	9.45053	12.4715	7.86479	24.9687	24.8374	13.1696	11.2923	6.0039	25.855	10.706	11.3177
596.378	6.54418		715.701	8.47646	19.8921		596.185	11.07	9.86637	11.8775	7.46485	25.4015	24.121	12.9511	9.92504	9.61189	25.9279	15.4145	15.3443
597.445	5.74624		716.992	8.93082	19.0626		597.253	14.9443	10.5757	9.84135	3.45248	23.5002	23.242	10.2194	9.88343	6.00789	25.1235	13.6192	15.5267
598.522	6.11452		718.277	3.99434	20.2958		598.329	17.4738	9.53922	10.3192	8.21859	35.5293	25.2793	10.5886	10.7858	1.61437	24.1233	19.2809	15.8125
599.59	3.79847		719.569	9.08142	24.301		599.397	13.8698	9.65567	9.93896	9.16673	33.7435	21.7224	11.3534	10.5478	7.71324	26.2204	15.1146	14.9878
600.666	2.72826		720.861	6.27841	23.9323		600.473	17.3807	9.51073	8.84911	8.64193	28.1963	24.2463	11.259	10.8495	8.83298	25.2183	12.5048	15.9428
601.734	5.70133		722.14	10.0674	31.3438		601.541	15.5067	8.89715	13.2459	4.60606	29.952	21.7804	11.0515	7.98054	5.10388	24.1713	17.086	12.3834
602.809	7.28573		723.428	13.4289	13.0594		602.617	9.37985	11.373	13.5107	8.92593	27.3387	26.7518	14.4062	7.08565	8.19586	24.3353	12.8364	11.23
603.877	5.50958		724.72	14.3936	26.864		603.685	14.5248	9.47413	12.9552	8.66125	41.0215	26.771	12.5877	12.0838	6.94053	22.4801	18.8344	13.774
604.953	6.20879		726	7.61251	15.7746		604.761	14.8323	10.4908	12.396	8.6688	35.9032	24.3734	13.5065	10.3587	8.2056	21.7915	5.42316	10.1314
606.022	4.4383		727.292	5.04075	17.4576		605.829	12.8615	10.213	13.4688	9.04104	34.6438	21.1633	7.72284	9.44712	8.77986	22.7201	14.4918	11.5804
607.098	4.47633		728.576	10.1692	16.8603		606.905	14.7821	9.68968	13.1097	8.34742	30.4351	23.3077	13.1833	9.02751	5.70191	21.5731	9.97319	12.3284
608.165	7.00592		729.869	5.95885	24.9415		607.973	12.6375	7.49708	13.334	6.5442	32.2465	19.5084	14.3723	7.42145	9.03651	24.6009	14.6473	11.093
609.241	7.80843		731.156	17.9924	24.4903		609.049	13.112	9.75258	6.64816	8.46387	31.5649	21.5702	7.02306	8.05857	12.993	22.1448	19.8249	9.49563
610.317	6.68151		732.441	18.5147	22.7318		610.117	12.3532	8.50192	9.44594	5.70343	32.0364	13.2272	7.14228	9.13592	9.35898	22.7301	8.85502	8.28531
611.386	7.61628		733.732	16.3627	17.7707		611.193	15.345	10.2622	11.5735	3.10144	30.2054	18.1167	8.14507	7.50162	12.0805	21.0744	17.2156	6.10794
612.462	3.24086		735.024	16.4293	25.4538		612.269	9.66112	9.55259	10.0992	8.59661	23.0618	18.8552	6.99187	7.81285	15.8713	21.0302	7.26622	8.36885
613.529	6.01867		736.309	14.0801	23.3541		613.337	17.3721	11.359	10.281	10.3141	37.1664	18.9334	9.61391	6.9088	13.2855	22.6407	17.4049	8.77207
614.605	8.37658		737.6	14.5722	17.6093		614.413	13.5721	10.3178	10.1524	9.19555	34.3791	19.6441	8.54295	9.14749	12.3704	22.2946	11.9429	9.3851
615.673	4.46198		738.888	11.6176	22.923		615.481	16.2308	10.2725	10.7944	12.6873	36.8455	16.1532	10.4505	6.36997	5.43254	24.2759	11.8612	17.5969
616.75	3.83394		740.168	16.3039	24.8436		616.557	17.862	9.60543	9.85748	8.94664	34.5843	14.9508	12.5162	6.28304	11.7891	26.3561	16.9128	8.6388
617.817	5.3719		741.46	20.0127	28.5916		617.625	16.4527	10.3555	15.6396	5.6349	35.4666	22.017	9.90515	8.8114	12.685	24.4397	8.2386	14.4398
618.893	2.74936		742.753	15.1165	24.041		618.701	16.4664	9.85562	11.4015	8.87954	36.3355	23.029	11.0905	9.48756	13.6663	27.2004	11.9561	6.82819
619.961	6.80838		744.036	14.5474	36.0163		619.769	17.0752	12.8468	10.7517	10.6823	33.4289	19.0958	10.296	7.76288	15.0636	26.1119	15.6785	4.06925
621.038	6.98193		745.329	10.757	24.2718		620.845	12.7697	12.9678	12.7267	10.2193	37.3701	23.8665	10.4051	10.0274	10.0552	26.6151	12.0419	8.97881
622.105	7.00001		746.612	20.4694	24.317		621.914	21.9628	15.9131	11.7661	8.8369	25.5344	20.1152	14.4082	8.99006	11.0177	26.5421	8.20281	3.10352
623.181	4.8262		747.904	15.06	23.926		622.989	17.8795	14.072	11.7804	9.5913	29.2819	19.867	11.3264	10.2567	9.9573	29.6188	17.6746	9.32131
624.25	6.32016		749.192	19.8013	22.958		624.057	18.1167	12.8706	14.1024	9.23747	25.4788	21.8937	11.4907	11.6629	10.6138	29.4325	8.74783	7.12166
625.325	6.37917		750.473	16.9775	25.0103		625.133	21.1552	20.0813	9.0913	8.43382	35.4775	22.6319	12.2771	10.6475	10.7826	27.3915	11.9856	12.2775
626.402	8.76175		751.764	14.515	28.3504		626.209	31.7946	20.5411	9.27978	12.3651	25.6901	21.6063	9.99441	10.4848	8.748	32.099	15.8726	9.8237
627.47	8.50256		753.056	17.6219	22.1456		627.277	42.1845	20.0211	11.7016	8.75072	24.6726	19.9527	11.9444	10.2013	7.44789	28.7595	17.2042	7.45467
628.546	5.56581		754.341	20.9904	27.5756		628.353	55.5081	16.758	12.2035	11.8139	28.9599	20.0793	13.4341	10.5837	6.7119	29.5802	11.4295	13.2209
629.614	6.7103		755.632	18.1577	33.1133		629.421	68.3571	22.5668	14.5624	15.1033	26.7427	21.0026	15.1796	9.17719	8.73796	29.9409	9.70875	10.1488
630.689	7.09344		756.924	19.1757	26.7967		630.497	83.9055	21.6796	13.2943	16.5818	30.6447	23.4487	11.2853	11.9048	9.10567	28.215	11.2508	11.2869
631.758	4.50958		758.204	19.9927	30.5912		631.565	90.0482	22.8044	12.5623	13.2035	20.1545	22.3391	13.8833	9.41551	4.78445	30.4408	11.2808	10.1609
632.834	5.93185		759.492	21.4697	23.391		632.641	90.2336	22.7099	19.5865	15.6154	25.3563	16.6977	14.2779	10.4509	8.90487	31.524	11.9038	8.9188
633.902	5.88339		760.785	13.6849	28.7552		633.709	92.2287	23.8024	19.2982	18.0666	22.9869	20.5437	8.7845	11.0237	7.39038	29.7897	7.85023	10.731
634.978	5.20627		762.065	16.7378	40.0543		634.785	94.956	24.098	23.4904	19.3666	23.4664	16.7001	11.1025	9.53939	14.2761	30.1649	15.6675	12.3977
636.046	7.4388		763.356	13.379	29.3896		635.853	100	34.2599	32.71	23.8475	33.2907	20.3375	9.96801	13.7225	9.27965	29.3539	11.975	15.6124
637.122	8.00107		764.641	13.409	36.9751		636.929	92.4894	39.3069	41.2126	21.735	23.1169	19.5992	11.9082	14.7873	12.5951	31.2106	20.6305	9.51777
638.19	6.50071		765.928	14.3298	23.8519		637.997	97.387	47.6204	52.9857	18.9867	32.4514	22.2872	12.6083	12.0446	8.88217	28.0364	13.9196	11.497
639.265	7.0017		767.216	20.7736	29.6465		639.073	90.6658	55.4432	69.1994	22.969	25.1252	16.8006	11.4683	11.6627	9.87126	30.1547	10.9429	11.9967
640.341	6.99633		768.496	16.7369	28.1634		640.141	88.8296	57.5799	74.7775	21.9456	20.188	15.6241	11.102	8.84375	12.4942	29.6449	7.64926	11.5159
641.41	7.9537		769.789	19.6116	32.0012		641.217	88.0133	63.657	87.8248	25.2854	19.7942	16.3179	13.7757	11.4682	9.69155	31.9641	9.14133	3.81009
642.485	8.11052		771.077	17.2341	25.0344		642.293	86.5874	69.6852	89.1393	27.2161	22.6116	21.9697	10.7739	9.96757	12.6832	31.6497	7.39765	8.83699
643.554	7.32957		772.361	15.2539	22.2068		643.361	82.3374	73.5318	88.3186	26.3157	19.2067	9.18527	9.90425	7.81801	13.0841	31.0551	6.41285	10.1728
644.63	7.7206		773.653	21.8191	26.8739		644.437	72.664	86.1249	90.6756	29.9269	26.5689	19.0427	10.8102	10.1612	8.92427	31.7493	12.9092	8.38834
645.697	8.11768		774.944	15.811	22.4404		645.505	76.5657	88.4798	82.4764	28.7312	23.3008	9.90506	9.82078	7.44301	15.1916	29.6743	13.7173	9.06078
646.773	5.03099		776.224	16.7901	26.5753		646.581	70.9928	85.5127	82.9146	29.9534	27.2105	7.85195	8.88012	9.35697	11.9523	29.468	14.7513	10.5207
647.841	3.31574		777.512	13.5229	27.5263		647.649	54.357	87.1543	84.7221	33.9004	22.6676	11.7839	10.0085	9.58337	16.5216	28.9297	7.6909	9.78915
648.917	7.33117		778.796	22.2907	24.4312		648.725	51.7945	86.1006	69.8539	37.4768	33.6084	14.6209	7.94864	7.87275	13.8855	30.5636	11.9088	8.83051
649.985	7.40237		780.088	16.7142	28.1077		649.793	43.5575	82.9818	83.7108	42.8604	22.3177	11.5702	11.3802	9.21503	9.33558	28.5743	17.9477	11.7392
651.062	4.6414		781.377	17.6614	28.246		650.869	39.6586	83.9558	69.2979	42.7372	21.9128	15.8874	11.9663	8.58192	9.43799	26.4445	15.8596	12.3662
652.129	4.6847		782.661	21.7269	31.2232		651.938	33.8318	76.729	74.0972	48.4869	22.0353	15.7423	8.91614	10.5162	8.79501	29.2847	12.4182	11.8235
653.206	6.84737		783.948	19.1379	21.1774		653.013	26.231	69.2585	80.0538	47.104	28.7418	14.6659	8.59098	7.60486	14.6043	27.8327	12.8147	9.69255
654.274	5.75866		785.236	19.7556	24.1179		654.081	25.962	69.1991	79.0776	50.8929	24.2168	12.2369	7.24833	9.91073	11.7428	30.0645	15.9414	11.492
655.349	8.4419		786.516	17.4665	21.8959		655.157	23.5947	62.2658	73.007	52.1051	26.8794	16.5496	8.74545	10.3478	12.67	24.5484	17.0667	14.0872
656.426	8.96996		787.809	19.1438	20.7344		656.225	16.7736	59.431	69.1407	56.8516	27.2423	15.371	8.60269	7.85356	13.9042	25.5064	12.9771	9.09202
657.493	7.26195		789.097	19.1849	24.312		657.301	14.3196	52.5978	71.7623	61.4692	28.7141	18.562	12.2854	9.43316	16.9993	23.69	22.9034	7.14641
658.569	10.5254		790.377	18.391	26.3727		658.377	10.1468	47.1239	73.0715	67.7803	30.6948	14.6223	6.83733	7.98108	16.102	22.5466	15.4249	7.5177
659.638	8.56517		791.664	14.4864	23.4266		659.445	12.5733	41.8932	62.4245	69.1813	33.0226	11.3944	11.0077	8.93664	13.7426	21.1346	12.5483	6.79793
660.714	6.43375		792.957	17.5224	27.1501		660.521	11.7746	39.0039	50.5139	78.8268	15.133	18.5266	7.46618	6.90232	14.6835	20.146	14.958	9.56585
661.781	5.19503		794.236	14.4681	21.7632		661.589	9.23988	31.2413	52.1823	83.6863	27.0083	11.7823	5.27969	9.38099	10.8718	20.3291	17.5447	3.0846
662.857	7.31517		795.524	14.6969	16.3898		662.665	10.8551	27.2722	41.0397	92.8133	23.2554	14.8993	4.7351	8.72669	19.6333	20.7035	16.5561	9.53528
663.926	9.32044		796.805	12.3124	23.7321		663.733	14.2049	23.7825	29.6988	97.0728	28.5448	10.4985	4.95596	6.65758	15.9184	17.4909	13.2709	7.26275
665.001	7.18565		798.097	17.6857	23.1977		664.809	11.7515	21.5356	23.4667	98.7075	29.5672	16.2019	8.6841	6.10686	18.7149	17.1424	8.73893	6.89954
666.069	7.02255		799.384	11.2642	21.0693		665.877	14.001	20.2964	21.3635	97.9581	25.9466	19.4308	4.61681	11.7199	14.3711	22.4026	11.2655	0
667.145	8.32542		800.664	15.1075	22.1027		666.953	9.97349	17.1682	13.081	93.7094	20.3995	15.0024	6.15944	7.77282	20.9055	20.3151	18.2754	5.80364
668.214	9.74026		801.953	10.7109	17.2127		668.021	8.38545	13.5701	13.8301	100	23.9404	14.0767	7.7019	9.80758	9.11861	18.2333	18.261	7.18838
669.289	7.98989		803.24	10.3611	20.5655		669.097	10.192	14.7692	12.6457	98.5594	30.2509	18.1711	12.306	8.13944	16.2591	20.3651	20.9214	4.41732
670.358	8.76001		804.52	6.01387	18.9527		670.165	8.74548	11.4536	11.0536	92.8653	26.6325	21.108	6.22411	10.5897	8.22039	20.0465	21.3746	7.33315
671.434	6.50229		805.809	7.17141	19.9592		671.241	6.65072	9.57262	14.9378	93.0623	31.5188	24.5339	13.5699	11.758	10.2556	18.2447	16.6778	5.22911
672.51	8.9394		807.1	8.18872	21.1434		672.309	8.17744	8.28694	11.2538	88.4905	29.8112	18.8265	12.0267	10.7284	8.46458	21.9007	14.9025	9.88318
673.578	8.56236		808.384	14.5078	18.2797		673.385	9.66464	7.91249	8.47306	92.6329	20.8812	20.84	10.5786	11.7849	16.765	21.8509	16.5322	2.48845
674.654	9.24717		809.673	8.65149	16.9142		674.461	8.3268	9.84582	9.23684	86.1987	25.3766	14.7351	9.89492	10.6617	11.1697	22.4574	17.7638	10.1957
675.722	7.44422		810.964	12.0604	22.5205		675.529	6.27303	5.96475	9.61519	82.2342	26.1681	21.2313	7.14564	10.5882	10.5167	22.7362	17.3626	7.34221
676.798	9.57345		812.244	13.2362	28.6604		676.605	6.39829	8.26027	10.9259	82.7835	32.567	19.3902	10.7876	13.0356	14.4757	18.4885	21.5974	9.30287
677.866	10.1671		813.537	14.8237	18.3403		677.673	8.48305	7.94552	6.51041	77.6136	25.3416	21.9916	9.94797	12.7273	10.0293	20.6309	15.6224	11.245
678.942	9.93178		814.821	19.0799	23.4225		678.749	8.58007	8.58823	10.4225	73.284	28.3039	23.18	4.19334	11.4615	11.1838	19.3997	15.356	10.561
680.01	10.8422		816.112	14.3422	24.3425		679.817	9.04348	8.28049	10.5901	59.299	31.4666	16.8784	9.97067	9.70434	16.0208	16.3524	25.2112	12.5561
681.086	8.19394		817.405	11.4944	23.6172		680.893	10.7153	5.16424	9.15522	59.1916	30.6472	13.232	7.39072	12.308	13.8835	14.506	14.9933	8.77456
682.154	10.6781		818.689	13.0344	17.4444		681.962	6.79055	5.59034	6.68936	54.4144	25.3116	13.5371	8.60685	17.7926	9.27213	15.8775	10.62	9.81281
683.23	11.0262		819.98	11.8955	23.2125		683.037	7.55801	6.58025	10.9473	51.2921	22.5345	17.1378	10.4767	16.7683	14.6008	17.0583	14.7305	11.0569
684.297	11.0465		821.269	6.95388	30.3726		684.105	8.91296	3.22859	9.12854	47.9304	31.5566	15.1228	11.9509	15.7957	9.30397	19.7502	13.1891	13.6355
685.373	9.46258		822.553	16.9338	18.4818		685.181	11.7769	2.37428	8.8457	45.3749	29.1801	17.1941	9.50923	14.4192	9.39183	21.2894	19.3966	14.1652
686.441	11.0175		823.845	14.6454	24.2462		686.249	9.16099	3.30385	8.5876	36.338	30.9755	14.8744	7.84925	14.8901	9.30447	17.1932	10.7057	10.2768
687.518	11.884		825.136	9.49278	26.8448		687.325	6.00995	2.30693	7.69027	38.3	28.9429	19.4886	9.2255	17.1444	9.97427	15.7537	16.5642	10.6438
688.594	11.8101		826.421	15.8838	29.3298		688.393	5.98344	3.05714	5.86833	34.9249	30.377	18.6403	9.83493	15.6745	12.4246	17.3039	7.91844	7.68712
689.662	12.3153		827.713	10.1585	22.9254		689.469	9.64058	4.10653	9.00199	29.1763	28.3432	19.5873	6.94942	17.8685	12.9201	20.8913	12.3586	9.6852
690.738	9.67974		828.993	14.7325	28.1438		690.545	5.73391	3.85562	13.0429	28.3818	27.5843	12.3239	9.92504	17.1133	7.92343	19.1551	7.64939	9.71311
691.806	11.5374		830.28	9.36515	23.8181		691.613	6.66959	5.623	11.9363	22.0817	28.8222	14.4624	9.47435	17.1716	12.9856	19.544	12.8979	11.9466
692.882	11.1788		831.572	14.784	26.8563		692.689	7.25903	4.48941	9.29507	21.5496	22.1747	16.0833	11.3841	17.6397	9.00385	19.1709	15.7342	3.54707
693.949	12.6532		832.857	14.4504	33.4525		693.757	5.52577	6.33181	15.317	19.0438	27.7952	19.7113	10.7095	17.301	8.17106	18.7904	9.2201	11.83
695.026	14.7957		834.148	9.56515	29.3085		694.833	4.11821	4.01811	6.35248	15.6664	30.9997	16.5237	8.38071	16.5924	5.10484	18.0659	14.9191	5.56594
696.093	11.466		835.441	16.8054	30.6811		695.901	9.07189	4.4035	9.36976	14.9755	26.6549	16.4842	9.97095	18.3654	10.0721	22.3563	9.25821	12.6274
697.17	7.92019		836.724	21.385	29.0235		696.977	8.20607	4.12562	11.8238	17.7476	26.1525	15.5691	10.3916	16.131	8.3001	21.0215	15.4207	10.7016
698.238	10.4558		838.016	31.4998	34.6807		698.045	7.7312	2.63104	8.25146	13.8621	22.0597	20.4702	6.40254	19.2945	6.40589	21.1084	15.633	12.4591
699.314	13.0476		839.305	45.0775	38.581		699.121	5.38377	5.87673	7.49988	15.3621	32.7064	18.7685	10.8876	17.4899	9.747	21.3513	10.9141	9.37876
700.381	13.2142		840.584	53.8952	33.5754		700.189	8.3631	4.0248	11.0125	12.6407	29.1836	12.6893	10.7925	18.0315	9.65883	21.6116	12.7783	6.66608
701.458	14.7593		841.873	71.9805	45.1771		701.265	7.60517	3.97254	9.08381	12.4794	34.5149	19.4914	11.8594	17.2732	9.98152	23.5607	15.3959	11.631
702.526	11.7733		843.164	71.2813	42.4076		702.333	12.5791	5.45242	11.2666	10.7678	31.7381	19.6893	10.7208	15.0176	7.91757	19.4847	12.3848	6.38959
703.602	13.2186		844.444	71.5849	38.6445		703.409	9.79776	3.26841	8.15088	14.107	31.6568	12.2209	12.641	15.5528	12.222	25.5839	11.1986	10.7324
704.678	13.0597		845.737	77.0288	45.8966		704.477	10.3977	3.92996	9.2522	11.0932	33.1773	12.8675	6.4706	17.7167	6.93932	25.316	11.0299	7.80861
705.745	16.2202		847.016	83.5418	47.8319		705.553	5.20747	2.77811	8.07927	12.294	37.8811	9.94478	6.62076	17.4808	7.03437	25.0086	12.763	11.9507
706.822	15.041		848.304	92.7738	55.6842		706.629	8.50418	5.65242	8.7152	8.80982	47.8416	13.1891	5.57873	14.0453	8.11739	23.2969	17.1054	8.26705
707.889	14.6594		849.592	94.5539	55.0151		707.697	5.74308	4.75462	7.19982	13.2473	34.1092	13.158	8.18832	18.2755	10.6574	20.3339	9.74584	7.67442
708.965	13.4509		850.877	96.4473	54.3258		708.773	9.39691	5.33242	9.60117	8.60192	34.9244	12.3414	3.59615	17.707	8.23604	20.5979	15.4879	12.8248
710.033	15.1811		852.168	97.2132	60.337		709.841	3.21538	3.85691	8.04498	11.037	32.6736	15.6077	7.91238	16.8738	14.2814	23.4574	11.6686	7.93304
711.11	13.1911		853.461	100	59.0547		710.917	6.89418	4.5314	8.77515	7.22501	28.8676	14.172	7.64675	19.3515	14.3473	24.9073	15.1739	6.63534
712.178	13.4209		854.745	93.4582	59.2167		711.986	10.6073	3.82378	10.0271	9.61593	32.9448	15.7649	12.4846	21.464	10.2413	27.314	10.7459	9.89336
713.254	11.4427		856.032	88.9614	53.5785		713.061	14.0832	4.86075	12.3713	10.3847	41.2103	16.69	4.50452	21.034	9.5075	24.4404	14.0152	9.80892
714.322	14.2537		857.324	85.5245	56.1476		714.129	9.74345	2.81292	8.06953	10.6934	38.6416	12.8948	7.59835	21.5951	8.14669	24.2594	27.3721	8.63194
715.398	14.9256		858.608	76.975	62.9799		715.205	5.783	3.13593	9.09042	8.54675	42.2047	18.7336	7.71131	19.6846	11.4822	26.8315	8.55851	9.45814
716.466	17.442		859.901	76.1592	58.6175		716.273	11.5588	4.95297	11.9439	8.94597	43.4172	15.9329	6.94795	20.5966	11.7874	22.826	22.0046	16.4058
717.541	15.1607		861.193	79.4796	67.2209		717.349	8.5026	7.92869	7.35087	11.5879	43.7044	12.9925	5.75677	25.6696	10.781	26.5718	12.7176	9.462
718.61	18.874		862.476	72.0964	73.9056		718.417	10.8286	5.60557	11.0964	9.69362	39.3061	16.5763	8.89305	27.1682	15.6275	28.7311	16.6548	13.2738
719.686	17.2084		863.765	63.8205	73.8586		719.493	8.46115	6.19565	10.2339	5.15463	38.6905	16.0508	8.98112	28.1842	8.11673	30.747	13.3025	15.4271
720.762	21.0739		865.049	63.2198	79.7124		720.561	9.32759	3.93633	7.63802	6.52394	33.7407	21.7375	10.2998	29.9267	11.267	30.5537	14.4271	9.74977
721.829	23.4978		866.336	67.8388	73.2911		721.637	8.02068	5.04165	7.75043	9.23903	38.965	24.5494	8.85115	34.3724	8.86662	33.6948	7.87602	9.24774
722.906	25.7056		867.628	55.5979	71.0058		722.713	8.79723	6.79529	7.33957	6.50854	45.0192	20.3552	9.62517	38.9126	10.6039	30.5214	9.0137	8.78968
723.974	25.7444		868.912	58.6502	75.1748		723.781	9.27964	4.29452	11.2715	6.94246	33.3038	24.3155	6.95035	44.3538	9.00304	31.8105	19.6122	6.23939
725.05	28.4632		870.2	55.4896	69.9401		724.857	9.14593	3.70241	7.85442	9.88335	38.1035	23.8496	7.84873	48.9798	7.21915	34.3292	10.6983	10.0946
726.118	29.8238		871.493	50.3607	74.483		725.925	14.7751	7.41247	9.46591	6.83206	43.1115	24.0525	11.5019	49.6368	9.39054	33.5398	15.6584	5.97061
727.194	30.3769		872.776	47.7867	66.0897		727.001	6.32955	5.58504	9.57256	7.93885	37.7142	29.8075	5.32261	56.6555	6.18945	35.3765	12.6077	11.603
728.261	34.7431		874.065	40.7771	61.6451		728.069	7.34159	3.73742	9.01012	8.86315	44.6955	27.6033	8.03397	62.8555	8.80514	34.1446	16.9479	12.4968
729.338	35.3527		875.357	51.5686	68.4633		729.145	9.05006	4.67409	12.728	7.23587	39.7512	34.3528	8.08662	72.5408	6.34273	39.1063	17.3733	12.6121
730.406	38.9961		876.636	42.6597	63.3416		730.213	9.2239	4.88109	10.2369	7.01292	40.451	25.8213	8.1077	82.5201	4.76259	34.4996	22.9508	13.1648
731.482	39.4266		877.929	40.3949	67.6248		731.289	10.3774	4.32272	9.42389	7.90225	36.3824	27.1708	6.92873	89.2133	7.86452	37.081	19.0525	13.3645
732.549	44.0232		879.213	39.7362	61.6864		732.357	8.56432	6.51221	10.8394	7.50128	35.7503	28.0815	9.3772	87.0056	9.03576	38.7086	11.0292	9.19191
733.625	43.0013		880.504	36.5809	63.3434		733.433	10.1603	4.25382	13.11	9.91229	31.073	26.3693	5.92296	94.0458	8.74369	37.8622	20.0255	13.4989
734.694	46.3698		881.792	40.2523	65.2167		734.501	9.61513	5.18264	7.32002	7.12066	30.2164	24.3278	12.0343	100	7.70733	39.2542	22.0639	10.2657
735.77	56.6402		883.072	34.6414	63.3076		735.577	4.55429	5.84347	6.04223	6.74022	35.0065	33.7873	12.7091	98.6729	6.80379	41.6865	16.8431	11.1855
736.846	56.3445		884.361	35.3921	60.3588		736.653	8.33739	6.31364	5.92757	8.04121	35.3992	27.3577	11.0589	95.1231	5.3777	37.2269	19.182	14.3469
737.913	59.9819		885.648	30.0709	61.9204		737.721	6.70715	4.62139	10.9133	7.56279	40.3271	25.9513	6.19782	94.5591	5.20481	41.6876	17.4556	12.4631
738.989	62.7502		886.933	29.1568	62.0354		738.797	12.1037	2.4455	12.5806	4.49537	37.648	26.8548	8.68463	97.8646	11.8606	42.3119	17.3804	10.2346
740.058	66.9004		888.225	38.4328	61.9988		739.865	10.4627	4.98409	10.4169	8.7806	32.1684	27.8675	7.98486	91.6744	9.11877	43.0466	26.2391	9.34275
741.134	66.5059		889.512	30.3618	50.4482		740.941	11.6443	3.72451	10.2273	8.11746	34.7051	29.2308	8.16691	91.1975	8.84535	40.693	29.7848	13.1659
742.202	72.5919		890.796	27.7268	53.5677		742.01	11.5641	5.97798	10.5192	9.84014	29.745	24.2757	9.5021	92.0938	7.74838	41.3371	19.9734	12.5408
743.277	75.5844		892.084	26.4877	47.453		743.085	6.61547	3.78206	3.75975	9.27949	31.7797	21.8309	8.92493	92.1963	5.93672	44.1347	36.0198	9.71789
744.345	77.0696		893.376	30.0816	45.7926		744.153	6.37875	5.97071	12.4239	7.89833	35.9212	24.2266	8.27685	90.6477	5.45095	44.9981	27.0063	11.8794
745.422	80.8279		894.657	35.8145	47.2097		745.229	11.1563	4.30808	10.7467	8.24411	40.9736	30.2746	2.57926	84.6078	4.61864	43.847	25.0241	6.47819
746.49	81.2414		895.944	27.9862	42.7574		746.297	14.5468	7.6271	10.6689	6.56293	48.2287	24.3745	8.96957	79.6564	5.78974	42.1234	29.7284	7.1205
747.566	87.6088		897.224	20.6049	45.5898		747.373	10.6591	6.41977	16.2877	7.60726	44.9475	24.4956	5.85727	80.2619	6.91759	41.2262	31.4666	8.36563
748.633	91.4021		898.513	24.9914	41.2942		748.441	7.13717	5.65837	9.40361	8.23582	42.9635	30.9272	6.50489	74.4579	6.33956	42.3423	37.7285	8.77416
749.709	89.5719		900	24.2305	49.4715		749.517	12.4471	7.79832	8.40199	5.70093	46.1798	30.1191	13.9579	77.5656	5.71479	45.1549	41.0117	10.5898
750.785	89.9302						750.585	7.16402	6.19004	10.0268	9.5823	41.9092	30.001	7.45709	68.4195	6.13417	43.4751	50.2633	6.7615
751.853	91.8843						751.661	12.6625	4.6461	11.6952	3.19384	54.1856	26.419	8.02198	63.7759	1.65027	39.2923	45.2637	13.1061
752.93	91.1959						752.737	12.9543	6.46118	7.00841	6.87665	44.9882	28.6278	10.6587	58.7249	0.373524	42.381	47.4945	13.3245
753.997	88.8198						753.805	9.21999	6.62853	5.12126	7.59037	40.4887	27.5048	10.6132	53.816	0	46.2825	44.0943	8.38558
755.074	86.8196						754.881	14.9327	5.73357	8.74958	6.17698	48.9338	29.2473	4.89573	49.4496	1.91046	44.0101	51.9024	10.1802
756.141	86.5157						755.949	12.0376	6.16455	9.65759	8.00391	54.4211	28.1807	6.71315	46.9409	3.00022	43.8714	41.6477	14.4298
757.218	83.7832						757.025	8.25683	7.1594	9.59507	6.57111	51.3971	29.3195	7.30602	42.7199	0.360125	43.2716	55.0196	8.18558
758.286	85.7018						758.093	11.1746	7.23547	10.9203	5.94687	59.8411	28.3385	11.9246	44.3954	3.38584	46.4522	50.2062	10.7853
759.362	79.6						759.169	15.6864	7.05583	8.67557	7.65518	59.8694	27.6463	5.76815	38.272	3.56546	42.3597	52.2384	7.06513
760.43	82.0118						760.237	10.0422	5.75583	11.4204	6.33132	60.838	32.3362	10.6764	36.2132	4.22815	42.6617	53.466	6.98901
761.506	78.753						761.313	10.1685	5.26926	9.02347	7.29749	61.2896	25.4076	7.71324	31.8447	5.51663	43.2787	50.2775	8.99905
762.574	77.0128						762.381	6.93301	6.61816	11.2701	9.00529	67.176	22.322	14.4307	30.9356	2.21387	43.3006	54.4699	6.85684
763.65	72.1328						763.457	9.19443	7.68721	8.32194	8.21534	61.89	27.3742	14.4955	29.2281	5.08817	43.5971	41.3134	10.345
764.717	67.9404						764.525	10.4023	4.89659	9.22089	8.25167	59.5328	23.0185	12.5781	24.0271	6.50511	45.8384	37.344	11.6677
765.793	63.308						765.601	10.0328	6.25914	9.15857	6.09047	58.9055	25.093	9.57769	23.5619	4.13967	45.3808	39.5078	10.1826
766.869	61.2934						766.669	8.19372	6.24101	12.3881	5.65425	60.0632	26.5094	11.9481	21.414	1.18178	43.5866	29.054	9.98363
767.938	61.7						767.745	12.3566	6.43092	10.772	7.6731	64.6512	28.046	11.6036	16.3071	2.94571	45.0322	32.096	6.58814
769.014	57.2478						768.821	9.65703	6.48328	5.56457	10.3797	74.5251	23.6197	12.5615	17.9829	5.86417	41.4094	35.0522	10.1086
770.082	53.9968						769.889	10.6062	5.70932	5.71826	9.58862	66.399	24.9789	12.0868	15.0738	4.0084	43.2245	24.4619	6.66796
771.158	51.9						770.965	8.63893	7.25232	7.52151	9.60468	63.0135	21.9706	13.0646	16.3889	7.32836	40.7613	20.0312	8.90066
772.225	49.6632						772.034	17.4571	7.00584	8.13493	5.78991	74.3016	17.5236	9.86197	14.7253	9.34682	38.9179	26.5307	10.2331
773.302	46.1116						773.109	8.74596	5.89492	8.73503	11.0086	79.8936	17.5696	12.9143	13.5157	10.7874	42.8797	18.6225	13.4339
774.369	40.0744						774.177	10.4415	6.63078	9.13861	9.17434	78.7904	21.1207	10.4237	15.0564	5.81841	39.4584	16.7382	8.66385
775.446	39.8635						775.253	10.816	7.56095	10.4125	7.56396	75.1662	21.9176	9.38027	10.5269	6.59941	41.4203	18.719	12.5033
776.514	37.0569						776.321	14.3702	7.1011	10.3281	10.143	83.7826	22.7425	7.90992	11.421	2.68234	41.3257	22.1221	6.10813
777.589	36.632						777.397	11.0868	7.13754	9.66727	9.82012	91.335	23.5634	8.6921	10.5429	6.35853	46.401	14.036	12.1311
778.658	31.3415						778.465	10.2684	7.50073	6.86487	9.65689	99.1659	25.0449	12.4774	9.10353	4.94868	46.7247	20.2829	11.4877
779.734	33.497						779.541	12.0345	8.48781	9.82123	6.42449	95.9432	25.2199	10.331	11.8599	1.73322	47.3427	8.16283	8.60927
780.802	28.9156						780.609	14.7645	6.39023	6.68453	7.20626	90.5595	28.3428	13.5664	9.63875	5.48925	47.837	9.74584	13.1263
781.877	27.2527						781.685	8.36994	5.92991	10.7336	7.88741	86.5822	19.242	12.8222	10.514	4.28069	48.1211	13.612	11.4538
782.954	23.7807						782.753	13.2858	5.15686	8.58319	9.68185	90.9174	21.1489	7.797	12.2646	10.3358	50.8482	9.32088	9.9795
784.022	21.2423						783.829	13.4459	7.29298	12.0545	5.82768	100	22.078	9.79794	9.03172	5.9417	50.0069	4.18069	7.31548
785.098	20.7207						784.905	10.0851	5.7459	11.0254	13.345	88.8743	24.7842	9.05724	9.19217	7.81795	49.8516	10.7892	13.1951
786.166	21.858						785.973	12.4338	5.70218	7.77813	11.3818	82.6457	26.3944	10.1394	10.7221	9.79234	51.7397	7.02744	10.1222
787.242	17.103						787.049	9.77274	6.40719	5.43973	9.63388	73.7682	20.2384	9.15796	7.32283	4.04868	53.4506	12.33	14.1356
788.309	15.7171						788.117	8.08584	6.09819	12.8013	8.79582	72.8068	21.2	7.80071	10.9068	6.73725	52.0201	11.6521	8.69559
789.385	14.8597						789.193	11.9841	4.06867	7.64446	6.58404	62.7852	24.6693	8.38382	10.9965	5.35512	53.8936	20.9201	17.2271
790.454	13.1732						790.261	6.30551	6.01129	8.01541	11.4653	50.0377	23.3316	9.05972	9.34252	5.05431	55.126	7.47015	17.551
791.53	13.1649						791.337	6.63242	5.08213	10.1679	11.5087	43.2308	21.5653	10.1003	9.73496	5.69438	52.7229	8.39155	16.0046
792.597	12.7843						792.405	8.11356	2.30779	10.8649	11.6899	34.8847	24.5378	8.71649	8.16952	5.59607	52.9103	4.02376	13.0606
793.674	11.9389						793.481	13.7905	2.29478	7.49187	13.7702	26.1827	19.3841	9.91052	9.08393	3.83993	54.8646	5.89813	14.3414
794.742	8.90069						794.549	6.07652	3.57525	7.56504	11.775	30.3156	23.6459	9.01895	9.61271	5.25541	52.9885	13.8258	11.0245
795.817	12.3045						795.625	8.56546	4.95787	11.5492	13.2977	24.0047	18.3583	7.82429	9.57841	7.95436	51.9329	10.6784	10.2494
796.886	7.47385						796.693	9.45932	3.311	8.64468	12.2886	24.634	22.8361	13.0208	7.22505	9.45338	54.3413	20.9419	12.0989
797.962	8.38073						797.769	11.3058	3.9215	9.42588	11.717	25.2113	19.5956	14.3006	7.17533	5.22971	53.7257	14.2481	12.2427
799.038	8.18173						798.837	12.6226	3.94344	9.12396	13.8322	24.1401	22.0914	12.1045	9.00969	10.6813	51.7963	11.124	12.6868
800.106	10.3291						799.913	11.7542	3.22758	8.13219	10.3218	16.8391	20.145	8.61832	7.51669	5.64442	53.2503	14.2982	13.9026
801.182	5.05468						800.989	9.49878	3.24755	7.73953	16.7408	24.369	21.7617	11.5956	5.77755	7.11733	49.8925	7.00065	15.5244
802.25	8.9184						802.058	6.7762	2.10853	6.88134	13.8297	26.9857	15.7478	12.0725	8.469	12.2654	50.6041	12.4982	16.7792
803.326	6.68477						803.133	14.2335	2.27921	12.8311	12.8902	18.1264	23.2033	7.77613	8.24798	8.31759	50.5041	6.12879	16.3238
804.393	7.4048						804.201	6.98842	3.57493	7.4552	12.2588	25.1508	18.4951	12.1849	10.045	5.92042	50.9903	4.12638	15.4597
805.469	7.89646						805.277	11.9959	4.97127	9.80163	11.7552	17.8148	17.9344	15.3628	8.2593	8.02359	53.8286	5.7322	17.4685
806.538	5.07431						806.345	13.6203	4.56562	10.8066	15.3504	15.1345	18.56	13.3676	9.58964	5.55921	51.6289	17.7935	15.3901
807.613	4.85934						807.421	8.15514	7.96606	10.9104	18.0966	17.4606	16.5561	14.6799	9.87918	4.38762	47.4172	12.2819	23.2898
808.681	5.45561						808.489	12.6712	4.56395	9.1792	17.9708	25.5297	16.2444	11.6421	8.31917	10.8072	50.3802	5.64421	24.5897
809.757	5.58457						809.565	10.7571	2.58988	10.5764	21.5514	9.4412	18.4285	12.6114	11.5683	5.15881	49.0853	14.0677	17.5212
810.826	4.50727						810.633	8.91955	4.25049	3.90162	19.4471	21.8887	17.6504	12.1975	8.71479	9.2946	49.508	13.2119	10.946
811.902	3.40631						811.709	6.6593	3.13459	9.20245	21.7258	24.2697	18.6052	13.5777	10.7809	6.09499	53.1834	10.7328	12.804
812.97	6.45134						812.777	9.8397	2.69469	9.01654	16.515	16.7334	18.5016	12.7769	8.92413	7.4762	50.3129	9.62282	17.6426
814.046	3.37173						813.853	12.7573	3.73971	8.15975	19.9924	23.7943	19.9212	11.9359	6.86212	8.75084	51.811	10.0684	14.5859
815.122	4.70659						814.921	9.23866	3.72288	11.0897	17.6598	15.8882	19.6647	11.8081	8.93741	6.576	51.1565	10.2998	11.442
816.19	6.94906						815.997	10.0468	3.91503	8.30562	18.9464	20.2569	18.3169	13.1557	7.22352	8.32515	50.8118	14.1203	12.089
817.266	4.2792						817.073	12.5177	0.628954	10.8324	19.7305	19.4944	18.7296	13.251	6.67768	4.60973	52.9487	9.26638	20.2951
818.333	3.4963						818.141	6.43637	1.55202	7.51301	17.0883	17.6673	22.1617	10.6778	8.17776	8.04939	54.3298	10.5725	20.7464
819.409	4.55146						819.217	9.56391	0.536918	8.19546	22.0468	24.7672	12.1464	8.84451	7.74717	10.1045	53.2388	11.8849	20.0893
820.477	6.30568						820.285	8.88403	1.94329	6.65355	21.067	23.7241	18.5478	11.8647	7.91237	9.67541	49.3828	7.92753	20.7803
821.554	4.09477						821.361	5.9248	1.30371	8.20759	27.4951	26.587	21.0285	9.62223	5.55065	14.3505	53.1098	8.17086	21.9457
822.622	4.24696						822.429	8.74039	3.72736	8.17339	25.8572	13.796	12.5617	13.0759	11.6542	9.61087	52.2735	10.5112	17.4332
823.698	2.90489						823.505	9.60153	0.934899	7.02621	28.7078	13.5415	18.1292	13.9706	8.62607	7.7434	53.5439	10.731	20.7166
824.766	5.33688						824.573	6.74686	2.79652	6.64735	24.2596	20.6	16.9801	13.3068	5.53467	11.7635	55.057	15.1793	17.6002
825.846	3.72715						825.649	9.24488	3.35124	10.9597	27.292	19.1979	17.2883	13.8903	8.89896	4.70771	55.551	10.7857	20.0241
826.914	3.69519						826.717	10.5179	2.05519	7.62205	31.7897	20.7618	19.0512	14.3651	5.27462	6.66304	51.8298	4.10643	17.9215
827.99	1.04282						827.793	14.601	1.03082	9.9907	31.2107	26.1127	12.0201	11.1884	8.58509	5.78021	54.5871	8.77265	14.0917
829.057	2.68176						828.861	11.5107	1.01056	8.44685	33.5343	28.4852	20.4703	13.2474	9.49156	7.74786	51.5262	10.6278	14.0376
830.133	4.11429						829.937	9.66634	5.46143	7.04833	28.5857	18.3129	16.0794	13.8007	9.32625	2.98806	53.7716	0.650709	11.9276
831.209	1.91387						831.005	10.101	4.27404	8.76623	29.7104	20.801	14.9906	16.6435	6.56492	4.82062	52.0051	6.3381	10.9693
832.278	4.72971						832.082	11.0065	4.87188	7.93161	27.1546	17.7505	15.5114	18.4443	10.3076	8.31874	53.9001	13.9882	13.086
833.353	3.00786						833.157	14.7563	5.37863	8.31427	27.338	12.5207	15.6469	15.8082	9.63824	6.1834	53.1286	11.8928	13.187
834.422	1.25344						834.225	10.8149	3.48892	10.8629	27.4449	31.3286	16.8609	13.9434	7.1288	9.26749	53.8555	8.90925	9.09426
835.497	3.002						835.301	10.6243	3.47868	8.17009	22.978	19.1376	19.3161	20.5091	8.7234	8.47193	52.9764	5.96139	8.2766
836.566	3.9061						836.369	11.8267	4.78037	10.1689	25.5349	19.4544	19.5694	12.7493	8.39531	5.73854	52.5326	3.1233	10.9676
837.642	1.55669						837.445	13.4985	1.69025	6.97242	25.1575	20.1137	17.2774	12.9876	7.72833	9.03316	52.9297	9.67296	9.86507
838.709	3.89588						838.513	13.2288	5.71693	5.95115	23.416	16.9962	14.9972	12.8163	10.2157	11.2323	52.6373	8.98453	9.74979
839.786	3.45012						839.589	14.5237	4.49142	8.83923	23.5761	24.2995	16.8123	13.7329	8.97415	11.3899	51.6592	5.52949	11.5823
840.854	3.73998						840.657	15.0665	5.15158	9.09939	22.1182	18.6395	18.8161	18.4859	7.98716	7.37777	52.5334	12.8884	6.76134
841.929	4.14565						841.733	16.4685	2.60015	12.0549	24.0943	19.8254	19.6835	17.483	8.78457	7.16197	53.4356	10.0497	11.6497
842.998	4.91824						842.801	12.6683	4.37188	9.60786	21.7209	28.6906	17.808	15.1479	9.16957	14.1682	50.62	8.32107	6.92052
844.074	6.29131						843.877	7.00097	3.8362	7.51164	22.8076	28.6747	20.6081	18.4516	7.5224	7.60433	48.7385	9.77814	9.60903
845.141	2.86513						844.945	7.91355	2.3988	4.62711	21.6448	23.4632	19.6761	15.2889	8.58109	5.5578	52.1577	7.63948	5.53962
846.217	3.25783						846.021	17.2693	1.86997	7.73997	18.4793	23.165	19.453	18.6839	8.57032	9.26797	52.8407	13.4434	5.36414
847.293	5.48597						847.089	8.65257	0	7.19107	15.8794	17.7097	19.1606	18.009	9.19372	8.27673	51.5307	13.8763	7.54314
848.362	4.73069						848.165	9.52525	2.63255	8.59481	18.7565	23.121	19.9429	19.8887	8.37991	5.44361	52.1123	13.0839	3.41483
849.438	7.40771						849.241	11.507	1.24101	6.06406	18.0229	14.0427	18.0271	22.1843	9.66592	5.61932	50.1777	14.0174	6.53497
850.505	3.63376						850.309	5.66553	2.53075	6.6154	16.0642	17.4435	20.2202	22.4038	9.9843	7.47866	49.4526	6.96702	8.24039
851.581	3.00317						851.385	7.87425	1.09635	8.65406	13.8452	12.8465	25.0093	22.5059	9.78588	7.91567	49.5533	11.7304	10.2962
852.65	5.37978						852.453	8.2399	3.28569	11.0945	12.9733	19.704	24.6322	27.6946	10.5138	10.3125	50.1229	17.871	6.81839
853.726	2.68713						853.529	7.96698	0.937233	9.21666	13.7913	20.0742	12.7859	25.5644	9.30551	9.52499	52.3199	6.02047	12.511
854.793	1.4501						854.597	8.90807	4.47177	8.30376	15.936	30.7759	17.1273	27.2648	8.79976	9.65157	53.9762	6.61064	11.5403
855.869	6.36774						855.673	6.91069	3.21657	8.45118	13.8659	21.7251	25.2097	25.0623	9.19885	7.36493	53.2876	5.79745	5.53324
856.937	5.90162						856.741	9.72243	5.68749	6.9333	11.9818	18.7797	22.5336	31.0239	10.7807	14.7435	49.3726	7.40718	11.1476
858.013	4.64367						857.817	12.4935	2.43897	7.32037	16.6754	20.8812	20.5492	28.7289	6.88708	11.3165	50.5183	5.40809	8.31571
859.082	3.11973						858.885	10.8672	3.55151	7.62557	15.47	13.8221	23.1936	33.3096	8.25751	11.8365	51.4165	13.5863	11.1567
860.158	4.15338						859.961	9.10403	4.36064	6.15469	11.7293	21.2586	16.1207	36.7539	8.95919	12.9161	48.6344	3.45813	10.5566
861.234	3.05877						861.029	11.4003	2.31312	8.61161	9.50837	19.5025	26.4009	34.5774	6.51097	10.9556	45.7061	9.08827	8.35012
862.301	3.02746						862.105	10.6082	5.15777	7.9929	13.7819	17.4996	23.413	38.214	7.88944	13.2796	46.8868	8.52765	11.4476
863.378	3.1091						863.181	13.7354	5.75061	7.82309	13.3101	13.1114	22.0686	41.5067	4.89192	10.8741	43.6129	13.4582	10.7879
864.446	3.26474						864.249	7.63648	6.34535	11.2218	9.51626	17.3364	24.575	37.3234	6.0886	7.19664	48.711	8.68997	10.52
865.522	2.01681						865.325	9.47307	6.07548	10.7112	8.10007	14.0964	34.0912	42.4365	7.46652	9.96542	49.3061	1.88355	9.84342
866.59	2.38831						866.393	9.49329	5.57427	10.006	12.4188	19.3998	33.57	44.238	7.01183	12.3865	46.7074	7.85061	15.8598
867.666	3.45912						867.469	7.2402	4.66972	8.6873	10.6591	25.1238	35.4518	45.0417	8.2984	7.61646	50.4093	12.1128	13.5659
868.733	2.06618						868.537	7.78628	4.53444	12.9527	11.4254	19.44	39.9353	49.4177	8.9091	8.13851	49.6483	1.99283	15.983
869.81	2.47248						869.613	8.62146	8.719	12.1092	8.5083	20.0647	38.8109	49.7708	8.05597	12.7602	47.1806	12.8076	15.8146
870.878	4.5268						870.681	9.55688	6.11895	10.9188	10.5051	15.5703	46.203	53.3723	6.56606	9.4313	46.3219	14.0781	17.9998
871.953	5.94832						871.757	8.61089	5.8335	9.58364	6.93016	21.4009	48.4375	56.5217	7.64622	5.68508	49.5934	8.44742	8.56918
873.022	4.97053						872.825	11.491	5.21026	8.34305	9.52745	33.6488	63.8587	68.6271	6.92188	11.1275	44.2541	8.47056	14.7346
874.098	4.14144						873.902	8.76032	5.75713	9.89847	9.57317	26.833	72.0781	71.1835	6.5033	7.43211	43.6997	12.2679	17.977
875.166	4.62496						874.969	6.95945	6.23128	9.16455	10.6229	20.7658	78.922	78.0652	6.10769	10.2155	43.7557	11.2659	17.4214
876.242	3.9681						876.045	12.8233	5.06855	4.90169	10.6436	21.5768	75.7035	88.7145	7.4313	12.8256	47.2363	7.93679	21.3988
877.318	1.85025						877.113	8.7019	8.33233	6.17395	14.4039	27.1477	87.5315	92.0388	4.20627	12.4301	46.8102	8.43751	23.5566
878.385	5.5906						878.189	10.9694	3.65705	5.86835	8.10191	27.3289	89.9945	100	8.39981	16.8076	47.9402	11.7461	21.9977
879.462	4.19394						879.265	12.9444	7.26195	7.37471	7.57425	24.8974	92.5802	93.0146	8.0763	11.6743	49.469	17.1207	28.0517
880.53	2.65212						880.333	14.0549	8.3304	8.02156	8.19733	19.1177	97.0878	98.8047	5.86031	11.6916	47.5472	21.5936	30.47
881.606	3.48471						881.409	13.0075	4.25183	13.0491	8.21153	17.5222	100	93.0403	6.92854	9.55565	48.3376	10.8138	44.1953
882.674	6.1635						882.477	8.87624	2.87566	10.363	8.95911	21.3348	99.1963	84.7897	5.85519	11.3199	50.1444	13.3204	37.7454
883.75	3.8574						883.553	9.43152	4.96745	3.33831	8.83544	20.5288	95.4454	80.9643	5.7131	12.0326	48.1489	13.1881	38.3676
884.818	4.59773						884.621	10.0275	5.24677	8.28323	8.56269	11.2842	89.6183	78.3829	4.9777	11.0061	49.0687	9.72071	33.1471
885.894	2.1933						885.697	10.0136	6.30163	10.1557	8.41009	22.2773	79.1959	79.2406	7.89672	13.5803	46.9468	11.3825	40.1789
886.962	4.30848						886.765	9.63835	6.37685	9.06009	5.23719	15.2337	72.8634	78.582	5.02838	14.1169	47.5676	16.9066	34.5293
888.038	0						887.841	7.77571	6.69186	10.8821	11.5123	15.9799	66.8705	74.2389	6.56331	8.96847	48.8321	8.51045	29.3489
889.106	3.22472						888.909	7.58008	6.5243	5.96455	9.14775	14.2347	66.1425	79.0879	4.91656	11.4467	51.6096	6.63289	32.0499
890.181	3.46368						889.985	8.40651	4.81018	8.65856	12.1181	25.4273	59.2761	67.5277	7.7966	14.0389	49.4178	10.181	27.1784
891.25	2.29092						891.053	7.80259	6.61551	5.54269	13.238	19.5664	55.346	62.9553	8.69447	11.6177	51.9028	13.2361	21.303
892.326	3.42009						892.129	11.6975	8.0949	11.5903	13.1527	14.9952	41.1362	62.1125	5.49054	12.6131	54.6806	12.7805	15.4549
893.402	3.48119						893.197	9.70921	6.45289	9.76646	10.3092	18.1777	33.5487	52.9324	4.30318	12.5783	54.1495	18.983	17.3805
894.47	3.38592						894.273	6.19604	5.6645	11.6764	10.7723	22.2843	32.6851	60.9084	7.03179	16.574	55.8669	17.1636	12.5362
895.546	5.49073						895.349	6.67711	5.62226	13.26	10.0961	21.9196	31.8028	57.1433	9.30963	7.44151	55.3923	15.6144	16.4465
896.613	4.5369						896.417	7.38875	3.47741	9.32331	11.4471	23.3558	28.2546	56.0021	6.59689	12.4387	58.4368	7.80919	8.42111
897.69	3.9335						897.493	0.174481	6.05181	7.19051	13.8623	18.0989	26.5938	57.6239	7.44037	12.24	61.022	17.6803	12.7721
898.758	2.9839						898.561	6.0298	3.6347	8.52791	14.2963	24.3729	22.9014	57.7812	8.2139	11.5739	60.167	20.5523	13.8889
900	4.07826						900	10.417	5.53952	10.7578	12.1787	22.5237	22.7	52.3062	7.42752	7.28273	63.526	14.0342	8.0003

## Sheet: SHH Deposits
Time (S)	Ca2+ Flux value	Shh Deposit		Time (S)	Ca2+ Flux value	Shh Deposit		Time (S)	Ca2+ Flux value	Shh Deposit		Time (S)	Ca2+ Flux value	Shh Deposit		Time (S)	Ca2+ Flux value	Shh Deposit		Time (S)	Ca2+ Flux value	Shh Deposit		Time (S)	Ca2+ Flux value	Shh Deposit		Time (S)	Ca2+ Flux value	Shh Deposit		Time (S)	Cell A	Cell B	Shh Deposits		Time (S)	Ca2+ Flux	Shh Deposits		Time (S)	Ca2+ Flux	Shh Deposits		Time (S)	Normalized to 100	Shh Deposits		Time (S)
0	31.4802			0	10.9784			0	20.271			0	1.44038			0	26.5062			0	46.0225			0	1.443			0	26.0255			0	11.7314	39.5886			0	23.7314			0	15.6224			0	38.2003			0
1.689	21.32			1.691	0			1.691	15.5549			3.362	1.93283			1.425	28.0772			1.412	59.7585			1.662	4.91497			1.703	13.1377			1.663	11.8458	5.9835			1.671	22.9841			1.671	14.5611			1.671	56.8549			1.642
3.379	47.362			3.383	14.7741			3.383	6.99877			6.729	1.32032			2.836	28.4641			2.825	74.9361			3.322	3.30478			3.409	23.0487			3.326	8.7783	27.7878			3.344	19.2741			3.344	10.8935			3.344	64.0945			3.278
5.07	31.0951			5.074	12.4677			5.074	8.14732			10.097	0			4.257	22.2817			4.238	66.8106			4.983	6.90148			5.112	18.3053			4.989	15.0818	13.9575			5.015	10.746			5.015	13.2195			5.015	66.5921			4.922
6.76	32.3681			6.765	6.89276			6.765	12.5055			13.454	8.69036			5.673	27.0162			5.651	89.2333			6.644	1.69513			6.817	24.1616			6.654	16.1689	23.3472			6.686	10.5603			6.686	13.6037			6.686	67.2948			6.566
8.449	34.6083			8.456	13.8423	0		8.456	13.5875			16.825	0.273677			7.092	21.7583			7.065	89.3854			8.306	5.08224			8.522	11.6007			8.316	10.2583	16.6603			8.358	28.1671			8.358	11.3908			8.358	70.3474			8.21
10.139	42.4923			10.147	28.2815	100		10.147	12.0881			20.193	7.53341			8.512	29.4538			8.478	87.2641	0		9.968	9.06594			10.226	9.27759			9.979	14.8277	16.6826			10.029	20.4835			10.029	11.0469			10.029	62.3833			9.854
11.829	49.4279			11.839	15.8736			11.839	11.0413			23.553	6.20303	0		9.933	21.4098			9.891	87.2295	100		11.629	2.7989			11.932	4.99334			11.643	20.4666	1.78029			11.701	13.6614			11.701	9.18321			11.701	53.3859			11.49
13.519	40.8932			13.53	25.0639			13.53	18.8474			26.921	7.92751	100		11.348	27.0234			11.304	78.0095			13.289	11.8128			13.637	24.683			13.306	13.1317	45.7859			13.374	22.7834			13.374	12.141			13.374	32.3463			13.133
15.21	41.327			15.221	32.2613			15.221	13.9439			30.289	17.5306	0		12.768	23.2526			12.717	83.7011			14.95	4.95706			15.34	9.60445	100		14.97	24.0823	35.7095			15.045	20.1184			15.045	12.7472			15.045	34.3942			14.778
16.9	33.1485			16.912	30.5451			16.912	10.9496			33.649	13.4008	100		14.188	26.8398			14.13	93.9532			16.611	6.64904			17.045	8.06741	0		16.634	17.6598	55.6383			16.716	10.3206			16.716	11.7466			16.716	24.688			16.422
18.589	42.7189			18.603	46.1191			18.603	19.1485			37.017	33.9442			15.617	24.2718			15.544	90.3797			18.273	7.41128			18.75	7.1841			18.296	20.1776	51.1367			18.388	28.9684			18.388	12.137			18.388	22.2963			18.066
20.279	43.6451			20.295	38.1973			20.295	7.52903			40.385	65.3721			17.025	29.3788			16.957	68.8222			19.935	5.80662			20.454	50.229			19.959	27.0594	34.4868			20.059	16.3587			20.059	14.9651			20.059	13.88			19.702
21.969	39.1006			21.986	37.206			21.986	5.22428			43.745	74.6008			18.444	32.0848			18.37	67.7253			21.596	6.94433			22.16	43.4893			21.622	13.5242	19.9392			21.731	11.2686			21.731	14.3072			21.731	10.3402			21.346
23.66	33.37			23.677	42.7456			23.677	13.9267			47.113	63.9835			19.865	28.6346			19.783	66.1925			23.256	1.40037			23.864	64.3269			23.286	14.2492	53.0323			23.404	13.1323			23.404	11.2857			23.404	16.5997			22.989
25.35	46.422			25.368	42.0397			25.368	13.844			50.481	38.6184			21.28	25.2296			21.196	54.6152	0		24.917	4.99991			25.568	27.1033	100		24.95	17.0018	54.6396			25.075	29.3182			25.075	9.36836			25.075	17.5374			24.634
27.04	36.1241			27.059	38.6158	0		27.059	8.00601			53.841	32.3422			22.7	23.0247			22.609	58.7777	100		26.579	3.05396			27.273	30.0801	0		26.613	15.686	44.0614			26.746	20.544			26.746	10.367			26.746	9.42479			26.278
28.729	55.2819			28.75	55.4324	100		28.75	10.2922			57.209	44.0253			24.12	25.426			24.023	68.8304			28.24	0.42624			28.977	45.256			28.276	22.6282	49.6447			28.418	13.2965			28.418	11.9712			28.418	15.6378			27.922
30.419	32.0288			30.442	66.6932			30.442	8.27406			60.577	29.4303			25.548	33.7417			25.436	73.235			29.902	3.00979			30.683	33.8849			29.939	4.78919	71.2879			30.089	18.691			30.089	10.4813			30.089	19.007			29.558
32.11	40.575			32.133	58.5801			32.133	12.9251			63.945	35.764			26.956	34.8774			26.849	64.5404			31.563	0.424628			32.388	49.3456			31.602	6.7869	57.6647			31.762	26.6468			31.762	13.5776			31.762	13.153			31.202
33.8	33.1762			33.824	62.8507			33.824	0			67.305	88.3019			28.377	36.3949			28.262	71.4922			33.223	2.66826			34.091	29.9478			33.267	21.9636	25.4294			33.434	22.0038			33.434	11.1866			33.434	19.2951			32.846
35.49	36.2297			35.515	71.1843			35.515	11.7351			70.669	100			29.796	37.5948			29.675	68.2576			34.884	2.25024			35.796	57.6642			34.93	9.82435	23.2404			35.105	25.3575			35.105	10.9575			35.105	22.7418			34.49
37.18	29.6868			37.206	79.2432			37.206	20.1863			74.037	62.9155			31.212	44.7572			31.088	57.4925			36.546	2.63063			37.501	63.2559			36.593	8.09697	30.3724			36.776	9.02922			36.776	13.8183			36.776	13.153			36.134
38.869	30.4509			38.898	71.9944			38.898	4.66838			77.397	62.7714	0		32.633	44.3349			32.502	52.3025			38.207	2.37481			39.205	58.3733			38.255	9.40158	20.7447			38.448	13.7154			38.448	12.8668			38.448	9.82375			37.77
40.559	30.5877			40.589	63.546			40.589	10.5197			80.765	83.2005	100		34.053	48.6037			33.915	54.5193	0		39.869	5.46217			40.911	31.193			39.919	15.6383	20.0562			40.119	21.0451			40.119	14.3035			40.119	22.8993			39.414
42.25	26.5551			42.28	54.0992			42.28	12.4387			84.133	55.9269			35.468	45.171			35.328	56.8846	100		41.53	0			42.615	28.4458			41.582	17.0018	20.7429			41.792	17.3888			41.792	11.3906			41.792	15.6378			41.057
43.94	25.9171			43.971	46.3475			43.971	12.7356			87.493	38.802			36.888	46.9041			36.741	62.0768			43.19	1.09855			44.319	26.5819			43.246	18.2574	19.2424			43.464	32.7281			43.464	10.3155			43.464	13.88			42.702
45.63	20.9889			45.662	36.5734			45.662	11.8693			90.861	28.2616			38.309	43.7796			38.154	69.3553			44.852	5.75747			46.024	10.9469			44.91	25.1521	41.4858			45.135	26.5756			45.135	10.1298			45.135	15.4272			44.346
47.32	39.229			47.353	26.12			47.353	14.2719			94.229	33.8524			39.736	41.9176	0		39.567	67.8428			46.513	6.60803			47.728	20.0719	100		46.573	10.6506	41.6809			46.806	20.2113			46.806	9.54348			46.806	17.2093			45.99
49.009	29.0602			49.045	34.8615			49.045	17.3559			97.585	63.472			41.145	43.4142	100		40.981	55.3281			48.174	9.01993	100		49.434	19.822	0		48.235	13.6924	39.9769			48.477	23.0123			48.477	12.4709			48.477	19.0136			47.626
50.7	31.1212			50.736	31.5726			50.736	10.0142			100.953	60.069			42.564	44.1344			42.394	50.9647			49.836	7.53754	0		51.139	34.3994			49.899	17.9295	29.0985			50.15	17.7538			50.15	13.755			50.15	8.86179			49.27
52.39	30.7339			52.427	13.9206			52.427	7.67154			104.321	33.7427			43.985	36.1117			43.807	40.8655			51.497	2.16184			52.843	20.2042			51.562	30.1251	20.5431			51.822	27.1392			51.822	12.1212			51.822	11.9805			50.913
54.08	38.361			54.118	17.01			54.118	22.9996			107.677	25.9596			45.405	36.0988			45.22	32.6654			53.157	1.10223			54.547	34.116			53.226	22.2658	34.4885			53.493	25.1697			53.493	11.7169			53.493	21.4452			52.558
55.77	35.5696			55.809	16.7688			55.809	19.7274			111.045	23.2827			46.821	34.5758			46.633	24.5535			54.819	3.30086			56.252	22.3949			54.889	20.5268	44.3699			55.165	15.2142			55.165	9.07198			55.165	11.5349			54.202
57.46	18.8095			57.501	15.5035			57.501	16.6343			114.413	9.59457			48.24	40.3085			48.046	33.8137			56.48	8.55322	100		57.957	7.97013			56.553	24.9646	21.3347			56.836	28.9187			56.836	9.88096			56.836	18.4374			55.838
59.149	29.3165			59.192	18.4966			59.192	7.51992			117.773	15.3098			49.668	29.6035			49.459	31.2136			58.141	29.428	0		59.662	16.6709			58.215	22.1386	19.4153			58.507	34.5918			58.507	12.8375			58.507	16.2008			57.482
60.839	19.6264			60.883	15.6853			60.883	11.4642			121.141	13.1261	0		51.077	36.3217			50.872	37.6138			59.803	55.0139			61.367	11.0442			59.878	19.8492	45.6687			60.18	27.502			60.18	11.4186			60.18	26.5966			59.125
62.529	34.6097			62.574	19.8424			62.574	18.1442			124.509	6.12443	100		52.497	35.5045			52.286	31.5194			61.464	71.7589			63.071	15.6903			61.543	20.4192	30.799			61.852	29.8559			61.852	11.9149			61.852	18.803			60.77
64.219	27.6383			64.265	22.4444	0		64.265	15.4691			127.869	18.9347			53.916	34.407			53.699	38.7965			63.124	49.5129			64.775	3.68588			63.206	23.34	59.4227			63.523	25.4202			63.523	10.2212			63.523	22.3053			62.414
65.909	34.7711			65.957	25.3664	100		65.957	14.1652			131.237	12.7653			55.336	33.9398			55.112	44.1407			64.786	49.4671			66.479	14.021	100		64.869	16.0484	46.257			65.195	26.0962			65.195	13.3673			65.195	17.3733			64.058
67.599	25.6367			67.648	22.1373			67.648	10.2339			134.605	9.09458			56.757	35.2352			56.525	33.3784			66.447	46.8369			68.185	12.7135	0		66.533	16.2768	32.1182			66.866	22.5652			66.866	13.3629			66.866	13.8491			65.694
69.289	30.9065	0		69.339	24.7611			69.339	19.2822			137.965	12.6019			58.173	34.0468			57.938	34.8264			68.109	17.2368			69.89	38.6837			68.195	28.2609	46.5571			68.538	17.5248			68.538	7.0647			68.538	12.6366			67.338
70.979	27.2443	100		71.03	25.2921			71.03	19.5887			141.333	15.4764			59.601	28.023			59.351	39.3657	0		69.77	11.5657			71.594	18.8617			69.859	30.2543	28.1286			70.21	17.6285			70.21	13.2925			70.21	27.6648			68.982
72.669	29.5411			72.721	30.596			72.721	14.6391			144.701	14.4396			61.009	32.1122			60.765	37.0047	100		71.431	11.3565			73.299	4.01275			71.523	39.326	16.2312			71.882	24.2			71.882	12.5029			71.882	17.4599			70.626
74.359	39.4662			74.412	24.2223			74.412	13.8473			148.062	13.5485			62.428	31.489			62.178	48.6077			73.092	6.51971	100		75.003	23.0487			73.186	35.5589	21.1498	100		73.553	21.8569			73.553	10.9137			73.553	21.6624			72.27
76.049	27.4769			76.104	20.9418			76.104	12.2887	0		151.433	5.0934			63.857	32.7286			63.591	43.1899			74.753	7.41259	0		76.707	2.24612			74.849	37.6715	20.3396	0		75.225	15.3177			75.225	13.9775			75.225	22.3185			73.905
77.74	30.4419			77.795	24.7867			77.795	73.4682	100		154.801	12.4204			65.269	37.0345			65.004	55.2691			76.414	4.57897			78.413	22.1654			76.512	14.7194	13.1538			76.896	12.7889			76.896	9.10149			76.896	7.03313			75.55
79.429	42.5061			79.486	9.75972			79.486	42.8933			158.157	9.60856			66.688	38.7511			66.417	48.995			78.076	5.76269			80.118	16.3441			78.175	19.157	33.8001			78.568	18.8247			78.568	12.4118			78.568	16.1233			77.194
81.119	44.0567			81.177	4.68668			81.177	23.3368			161.521	16.1992			68.104	38.9212			67.831	44.6684			79.737	7.07344			81.822	35.2827			79.839	38.6398	17.2586			80.24	15.4647			80.24	13.2507			80.24	17.0918			78.837
82.809	47.8777			82.868	8.1388			82.868	8.70966			164.889	10.1226			69.525	37.6288			69.244	45.9023			81.398	8.04549			83.527	17.8811			81.502	33.2337	14.0679			81.912	16.9525			81.912	10.3266			81.912	10.8079			80.482
84.499	57.9345			84.56	12.9241			84.56	13.671			168.245	19.8485			70.941	41.1435			70.658	57.0737			83.059	27.8234			85.23	12.7135			83.166	53.5663	9.15751			83.583	30.7714			83.583	12.0397			83.583	11.4884			82.126
86.189	81.2433			86.251	18.45			86.251	15.9964			171.613	20.2641			72.361	43.7017			72.07	54.496			84.72	66.9189			86.936	5.30982			84.829	68.4711	6.17506			85.255	25.1049			85.255	14.0793			85.255	16.7638			83.762
87.88	70.3211			87.942	13.222			87.942	12.1665	0		174.981	14.4132			73.789	34.7256			73.483	44.8784			86.381	41.4126			88.641	47.3306			86.492	67.8928	14.3746			86.927	16.9633			86.927	14.6175			86.927	14.3603			85.406
89.569	73.6207			89.633	8.81008			89.633	11.31	100		178.337	11.3747			75.201	37.2693			74.896	37.1902			88.043	36.3359			90.345	15.2312	100		88.155	63.216	25.4702			88.598	8.4244			88.598	17.2739			88.598	11.5349			87.05
91.259	53.973			91.324	11.9072			91.324	7.00465			181.705	15.3335			76.62	37.2674			76.309	38.6424			89.704	55.1694			92.05	4.56919	0		89.819	78.7898	34.9802			90.27	19.775			90.27	15.9926			90.27	11.8874			88.694
92.949	43.1651			93.015	16.3716			93.015	14.7126			185.069	12.1557			78.037	46.1856			77.723	41.2839	0		91.366	47.5712			93.755	32.0763			91.482	63.7836	13.1538			91.941	9.6123			91.941	15.9807			91.941	22.9924			90.338
94.639	55.9887			94.707	6.82899			94.707	32.2427			188.437	11.2001	0		79.457	43.5833			79.136	43.9101	100		93.026	49.1277			95.458	16.1145			93.145	68.8728	17.3349			93.613	10.2774			93.613	14.0319			93.613	16.786			91.974
96.33	61.312			96.398	9.25524			96.398	19.2464			191.797	12.5423	100		80.873	35.7098	0		80.55	44.7197			94.687	34.9842			97.164	19.3209			94.809	52.8606	30.8228			95.285	13.318			95.285	12.817			95.285	13.9422			93.618
98.019	40.8544			98.089	18.8518			98.089	27.4582	0		195.165	22.9999			82.293	52.0309	100		81.962	52.3168			96.348	36.5129	100		98.869	26.6792			96.472	58.2044	28.4287	100		96.956	26.3034			96.956	16.3367			96.956	14.4187			95.261
99.709	44.4482			99.78	23.702			99.78	41.5746	100		198.533	53.7778			83.721	45.0335			83.375	51.0523			98.01	27.1064	0		100.573	23.932			98.134	44.2298	31.0247	0		98.628	29.8667			98.628	15.3918			98.628	22.5194			96.906
101.399	50.4342			101.471	20.2537			101.471	34.8497			201.893	57.9274			85.132	48.2533			84.788	42.0053			99.671	19.0559			102.278	48.5946			99.799	39.2722	20.4123			100.3	31.4474			100.3	16.7994			100.3	20.7957			98.55
103.089	31.7438			103.163	24.4893			103.163	23.4701			205.261	42.5444			86.552	40.3961			86.202	62.9782			101.333	12.534			103.982	31.193			101.462	40.4261	12.0704			101.971	17.2851			101.971	13.1484			101.971	13.2395			100.186
104.78	33.9769			104.854	30.0687			104.854	53.2186			208.629	33.2294			87.981	39.1904			87.615	48.5089			102.993	13.7183			105.687	31.7495			103.125	44.1797	24.5273			103.643	26.636			103.643	12.9334			103.643	11.5815			101.83
106.47	36.8305			106.545	19.3445			106.545	50.6794			211.985	37.4989			89.388	40.9217			89.028	54.186			104.654	40.537			107.392	31.4226			104.789	40.7217	32.5997			105.316	19.6175			105.316	19.1789			105.316	15.1613			103.473
108.159	29.8186			108.236	20.819			108.236	17.9715			215.353	21.0376			90.809	41.5365			90.442	46.7166			106.315	43.0291			109.096	24.5857			106.452	22.4709	53.8481			106.986	25.5454			106.986	15.6093			106.986	13.5985			105.118
109.849	36.4669			109.927	20.5475			109.927	11.422			218.721	18.3736			92.224	43.766			91.854	46.4631			107.977	33.4575			110.801	40.318			108.115	34.8209	81.3643			108.658	33.8553			108.658	16.3341			108.658	11.7455			106.762
111.539	35.6595			111.619	21.064			111.619	18.6563			222.081	10.8346			93.645	37.2143			93.267	38.4917			109.639	15.6243			112.506	40.2207			109.778	18.7489	71.3897			110.33	19.2244			110.33	15.9051			110.33	12.3794			108.405
113.23	29.9257			113.31	24.8068			113.31	10.4189			225.449	15.2628			95.065	35.7601			94.68	39.9029			111.3	9.48611			114.21	11.6979			111.442	30.3146	32.4165			112.001	25.8584			112.001	16.4318			112.001	12.321	100		110.042
114.92	32.964			115.001	28.3882			115.001	10.6332			228.817	16.1994			96.484	39.0047			96.094	41.1396			112.96	9.14742			115.915	32.3059			113.105	24.5547	5.08146			113.673	27.4523			113.673	14.9656			113.673	24.1406	0		111.686
116.61	16.8751			116.692	23.8343			116.692	14.2867			232.177	16.6215			97.913	37.7925			97.507	41.7735			114.621	7.91824			117.62	23.0487			114.768	22.5313	35.2059			115.346	14.7561			115.346	15.321			115.346	18.28			113.33
118.298	18.6477			118.383	22.6429			118.383	24.0297	0		235.545	14.1415			99.321	45.5734			98.92	46.6984			116.282	3.34687			119.324	30.8662			116.433	10.7044	17.5605			117.016	13.4972			117.016	13.9555			117.016	11.0894			114.974
119.988	26.2696			120.074	19.6259			120.074	14.1847	100		238.913	10.7333			100.741	37.8968			100.334	48.4145			117.945	7.96424			121.029	30.7689			118.095	28.4485	26.4348			118.688	16.5271			118.688	15.3922			118.688	30.1739			116.618
121.678	22.5323			121.766	22.6503			121.766	12.9133			242.273	6.72994			102.16	45.0759			101.746	42.2529			119.606	3.38842			122.735	4.90989			119.758	28.846	31.242			120.36	17.6716			120.36	14.1116			120.36	31.1206			118.254
123.369	30.2989			123.457	22.4589			123.457	19.8675			245.641	12.0934			103.576	40.8602			103.159	41.148			121.267	8.00525			124.438	20.1488			121.422	8.02517	36.5994			122.031	16.8383			122.031	10.1097			122.031	72.8516			119.898
125.059	28.7544			125.148	25.2693			125.148	5.91099			249.009	13.85			104.997	39.0549			104.573	54.1075			122.927	4.71088			126.143	10.1609			123.085	5.44084	36.8774			123.703	37.1853			123.703	12.624			123.703	94.563			121.542
126.749	24.2113			126.839	18.9667			126.839	18.8779			252.369	18.2353			106.416	37.336			105.986	52.9007			124.588	10.0779			127.847	40.1234	100		124.748	6.53433	28.2354			125.376	24.6081			125.376	11.0028			125.376	82.8641			123.186
128.438	18.964			128.53	24.0975			128.53	10.6357			255.737	23.525	0		107.844	37.3755			107.399	57.931	0		126.25	5.58943			129.552	21.9154	0		126.412	15.5112	21.5364	100		127.046	34.2202			127.046	12.8053			127.046	77.2916			124.83
130.128	12.9154			130.222	25.7128	0		130.222	15.9257			259.105	22.4516	100		109.252	31.3508			108.812	68.3283	100		127.912	2.03536			131.257	38.9132			128.075	12.92	36.5045	0		128.718	20.1076			128.718	13.3355			128.718	68.9128			126.474
131.819	31.9378			131.913	30.364	100		131.913	8.96406			262.465	23.8281			110.672	39.1062			110.226	72.3023			129.573	9.23259			132.962	28.3135			129.738	5.01806	42.7524			130.39	16.2334	100		130.39	14.4213			130.39	79.7437			128.11
133.509	13.7753			133.604	37.1736			133.604	31.7339	0		265.829	64.7746			112.1	37.1357			111.638	68.867			131.234	5.03992	100		134.666	18.208			131.401	9.20084	23.5338			132.061	11.9444	0		132.061	14.5461			132.061	75.4254			129.754
135.199	15.6392			135.295	47.2553			135.295	26.4935	100		269.197	43.1531			113.508	39.7215			113.051	70.8766			132.894	2.66988	0		136.371	23.932			133.065	19.9056	39.5142			133.734	11.8517			133.734	14.5712			133.734	66.3996			131.398
136.889	11.1783			136.986	46.3268			136.986	19.5138			272.553	16.9738			114.928	36.9065			114.465	72.8472			134.555	7.62348			138.075	35.9364			134.729	17.6664	75.074			135.406	24.3037			135.406	10.4186			135.406	26.0467			133.042
138.578	20.0659			138.678	51.3854			138.678	16.1368			275.921	14.9893			116.348	43.8843			115.878	60.4057			136.217	1.99304			139.78	30.8662			136.392	12.7583	80.1639			137.076	23.0123			137.076	15.4164			137.076	25.6877			134.686
140.269	37.8929			140.369	50.9197			140.369	14.3849			279.289	16.0313			117.764	36.6458			117.291	47.3782			137.879	9.44349			141.486	38.6837			138.055	15.8068	33.0931			138.748	24.6901			138.748	18.8803			138.748	46.3903			136.321
141.959	22.0056			142.06	49.8107			142.06	20.8329			282.649	16.0546	0		119.184	38.8074			118.704	53.8136			139.54	5.93019			143.19	32.3059	100		139.718	17.3641	76.9815			140.419	28.4176			140.419	14.25			140.419	38.9582			137.966
143.649	22.9379			143.751	36.3307			143.751	11.2011			286.017	3.92777	100		120.604	38.5573			120.118	49.5121			141.201	6.39637			144.894	68.2843	0		141.381	7.42757	13.9676	100		142.091	18.4556			142.091	13.7698			142.091	30.4245			139.61
145.339	18.1814			145.442	30.2306			145.442	20.2771			289.385	9.38369			122.032	39.2893			121.53	42.5801	0		142.861	2.84122			146.599	53.7272			143.045	19.5607	15.224	0		143.764	46.4153			143.764	11.3322			143.764	18.0916			141.254
147.029	24.0167			147.133	49.6894			147.133	7.80777			292.745	11.2629			123.441	36.5109			122.943	44.7391	100		144.522	2.25535			148.303	68.2843			144.709	11.3753	19.7561			145.435	43.5171			145.435	15.2752			145.435	22.2963			142.898
148.718	24.7272			148.825	39.8929			148.825	16.6679			296.109	17.9298	0		124.86	33.8926			124.357	62.1244			146.184	2.28987			150.008	53.2058			146.372	18.654	33.9069			147.106	27.4696			147.106	14.2602			147.106	23.7969			144.542
150.409	19.8923			150.516	35.5828			150.516	7.80486			299.477	21.4703	100		126.281	37.9348			125.77	53.4189			147.846	6.56541			151.713	44.4077			148.034	18.1906	27.0045			148.778	28.0311			148.778	12.9362			148.778	12.1667			146.178
152.099	16.1337			152.207	43.0708			152.207	14.209			302.833	17.8607			127.701	43.9433			127.183	48.4547			149.507	9.10718			153.418	37.4951			149.698	27.4819	41.9894	100		150.449	32.3954			150.449	16.2186			150.449	11.8564			147.822
153.789	32.2855			153.898	36.6179			153.898	15.8625			306.201	18.8666			129.116	34.3578			128.596	42.3634			151.168	19.3958			155.122	36.8198			151.361	32.1918	62.0374	0		152.121	16.5876			152.121	18.1922			152.121	21.8508			149.466
155.479	17.799			155.589	25.0826			155.589	28.8873			309.569	31.0477			130.536	38.2893			130.01	34.2523			152.829	34.006			156.826	43.4271			153.025	36.2902	43.7918			153.794	23.5132	100		153.794	16.5729			153.794	20.0687			151.11
157.169	28.9072			157.281	33.6908			157.281	26.0655			312.937	37.0285			131.965	40.2332			131.422	36.8824			154.489	18.4592			158.531	20.6283			154.689	24.3129	75.6844			155.465	15.3177	0		155.465	15.0519			155.465	18.444			152.754
158.858	30.631			158.972	25.7453			158.972	11.8469			316.297	18.1269	0		133.373	46.9064			132.836	42.5044			156.152	20.4102			160.237	27.4652			156.352	52.488	70.5082			157.136	31.8016			157.136	12.8781			157.136	8.01071			154.39
160.549	28.6747			160.663	19.3916			160.663	15.9257			319.661	8.47022	100		134.793	46.5841			134.249	39.0765			157.813	33.3287			161.941	23.2783			158.014	86.9678	76.0693			158.808	24.8046			158.808	15.3619			158.808	11.4884			156.034
162.239	16.9663			162.354	22.7957			162.354	19.167			323.029	7.82342			136.221	35.4967			135.662	40.6049			159.474	23.8085			163.646	38.8579			159.678	100	42.4744			160.479	53.9952			160.479	15.2247			160.479	15.4028			157.678
163.929	28.6038			164.045	24.6964			164.045	15.7722			326.389	15.5354			137.633	38.9015			137.075	43.5025			161.135	11.8159			165.35	21.5116			161.341	74.6738	42.6558			162.152	51.3302			162.152	18.416			162.152	22.7574			159.322
165.619	31.3595			165.737	25.9849			165.737	15.1473			329.753	24.2743			139.048	35.2309			138.488	40.2471			162.796	6.22864			167.054	30.2124			163.005	60.8623	30.8295			163.824	28.087			163.824	20.0356			163.824	9.4404			160.966
167.309	32.9399			167.428	16.1246			167.428	13.5669			333.121	20.0436			140.468	45.2707			139.902	44.2575			164.456	8.89606			168.759	42.2169	100		164.668	67.6903	29.9292			165.495	100			165.495	17.4059			165.495	19.6475			162.61
168.999	29.0789			169.119	25.9995			169.119	14.6358			336.481	31.6053			141.889	45.8617			141.315	43.9413			166.119	3.98131			170.464	22.5138	0		166.332	66.8853	35.5142			167.166	62.9487			167.166	16.1013			167.166	12.1445			164.246
170.689	26.2294			170.81	23.7989	0		170.81	10.4705			339.849	17.0531			143.304	41.6756			142.728	42.467			167.78	5.08754			172.169	33.6134			167.994	71.0146	63.7191			168.838	39.3318			168.838	17.3508			168.838	15.8883			165.89
172.379	36.954			172.501	28.9004	100		172.501	15.6078			343.217	23.9277	0		144.725	42.4942			144.141	39.7934			169.441	6.31273			173.874	35.7069			169.657	44.1907	41.3946			170.51	38.4875			170.51	8.7985			170.51	21.3809			167.534
174.069	27.2647			174.192	18.0265			174.192	11.6966			346.577	26.0302	100		146.153	52.9196			145.554	37.0493			171.102	4.95944			175.577	25.7959			171.321	31.3698	43.8596			172.182	38.9776			172.182	6.89215			172.182	20.1552	100		169.178
175.759	32.457			175.884	19.1927			175.884	8.72911			349.945	69.8298			147.564	47.6438			146.967	33.9604			172.763	8.46828			177.282	39.567			172.985	26.3019	28.0014			173.854	27.8992			173.854	16.7118			173.854	10.7614	0		170.822
177.449	29.4993			177.575	20.4615			177.575	19.2361			353.313	77.2825			148.98	45.3894			148.38	25.41			174.424	7.75151			178.988	28.7727			174.648	18.9758	35.8906			175.525	12.7564	100		175.525	19.0263			175.525	21.2812			172.457
179.138	35.6109			179.266	13.5395			179.266	12.3668			356.673	42.107			150.401	47.453			149.793	30.1029			176.086	0.255053			180.692	28.6754			176.312	32.7828	38.9174			177.196	26.4826	0		177.196	14.2499			177.196	21.0063			174.102
180.828	37.7241	0		180.957	20.4635			180.957	10.9817			360.041	27.6536			151.82	49.741			151.207	25.7741			177.747	5.29467			182.397	28.2162			177.975	8.92476	38.5916			178.868	17.0173			178.868	15.5657	100		178.868	62.3718			175.746
182.518	31.5954	100		182.648	29.4346			182.648	11.6846			363.409	23.7638			153.237	50.4471			152.62	25.405			179.408	7.88383			184.101	19.0913			179.637	5.73623	38.8815			180.54	30.3957			180.54	13.8394	0		180.54	80.8224			177.39
184.208	22.1929			184.34	22.3399			184.34	12.6647			366.769	8.99031			154.656	49.7687			154.033	16.4093			181.069	5.1264			185.805	4.01275			181.301	9.33482	14.9443			182.212	19.1596			182.212	19.1714			182.212	71.6816			179.034
185.898	41.0805			186.031	23.887			186.031	20.247			370.137	10.9002			156.084	48.9968			155.446	8.6239			182.73	1.43985			187.511	21.1848			182.965	19.6338	22.3299			183.883	32.145	100		183.883	28.439			183.883	71.6572			180.67
187.589	34.9351			187.722	37.4142			187.722	14.9998			373.505	16.2014			157.496	47.2033			156.859	14.1484			184.392	3.90006			189.216	29.0995			184.628	6.40101	26.5759			185.555	62.7133	0		185.555	35.5933			185.555	44.4908			182.314
189.278	28.1322			189.413	35.1716			189.413	14.8426			376.865	17.8058			158.916	44.8357			158.273	11.7542			186.053	6.94587	100		190.92	36.0337			186.291	10.1479	17.4435			187.226	68.1554			187.226	45.3124			187.226	49.3206			183.958
190.968	51.2591			191.104	34.1859	0		191.104	15.1287			380.233	12.478			160.333	44.047			159.686	13.999			187.714	3.72995	0		192.625	19.9746			187.955	9.81799	28.9136			188.898	47.875			188.898	31.4563			188.898	48.5071			185.602
192.658	33.1862			192.796	45.6916	100		192.796	10.8591			383.601	6.92197			161.753	35.7579			161.099	3.83924			189.375	5.84633			194.328	29.3291			189.617	14.907	32.9099			190.57	41.5712			190.57	25.5081			190.57	35.425			187.246
194.348	33.5708			194.487	49.0909			194.487	13.3174			386.961	8.78984			163.173	33.5102			162.512	1.97673			191.036	11.9014			196.033	17.8811	100		191.281	17.0751	21.0549			192.242	31.5942			192.242	18.7936			192.242	35.4649			188.89
196.039	61.9061	0		196.178	50.2755			196.178	11.8473			390.329	9.63495			164.589	38.1888			163.925	13.8299	0		192.697	24.4019			197.739	17.6515	0		192.945	5.54274	38.4988			193.913	38.1484			193.913	11.4943			193.913	31.9341			190.526
197.729	60.6872	100		197.869	63.7809			197.869	16.9949			393.697	13.0532			166.008	39.7302			165.338	23.3882	100		194.359	93.1933			199.443	27.7921			194.608	21.2584	38.6798			195.585	55.2694			195.585	17.5668			195.585	21.6958			192.17
199.418	96.3214			199.56	60.895			199.56	14.1121			397.057	10.6749			167.429	35.6972			166.751	15.4447			196.02	62.3066			201.148	28.3905			196.271	7.34168	23.168			197.256	39.2498			197.256	11.3763			197.256	21.9863			193.814
201.108	66.8275			201.251	61.0254			201.251	14.3519	0		400.421	22.1509			168.849	35.7664			168.165	16.1008			197.681	40.5339			202.853	33.1892			197.934	11.1878	18.9423			198.928	38.71			198.928	12.0265			198.928	32.7296			195.458
202.798	50.6605			202.943	59.499			202.943	10.0239	100		403.789	18.5262			170.277	40.2348			169.578	21.5435			199.342	18.1227			204.556	26.6792			199.598	15.263	26.4263			200.6	32.417			200.6	8.17756			200.6	16.8259			197.102
204.489	58.6746			204.634	58.5901			204.634	15.8253			407.149	13.8328			171.685	30.0968			170.991	21.8993			201.003	8.9363			206.261	36.5902			201.261	5.68878	26.2348			202.272	32.2917	100		202.272	13.8236			202.272	20.5608			198.738
206.179	70.2896			206.325	62.0649			206.325	16.397			410.517	11.0586			173.105	37.1865			172.404	21.2834			202.665	9.32249			207.967	28.2162			202.924	8.91205	15.8344			203.943	27.774	0		203.943	10.6524			203.943	21.7267	100		200.382
207.869	71.402			208.016	73.2952			208.016	19.0948			413.885	23.0633			174.52	30.7593			173.817	30.5707			204.326	1.95095			209.671	33.0569			204.588	18.2033	37.7981	100		205.615	29.2403			205.615	12.5128			205.615	11.3125	0		202.026
209.558	51.0471			209.708	55.7743			209.708	13.927			417.241	21.3339			175.94	35.7547			175.23	31.0207			205.987	4.8735			211.376	25.1422	100		206.251	13.712	19.941	0		207.286	21.2351			207.286	16.4521			207.286	19.0727			203.67
211.248	53.5509			211.4	58.5095			211.4	14.9437			420.605	11.0546	0		177.36	28.5708			176.644	28.6599			207.648	5.46563			213.08	23.0487	0		207.914	11.369	29.8122			208.958	28.3571			208.958	14.3078			208.958	11.7455			205.314
212.938	43.5828			213.091	53.7201			213.091	16.2124			423.973	12.9127	100		178.781	30.6847			178.057	28.7012			209.309	5.88918			214.784	26.0255			209.578	3.10445	44.8531			210.63	41.8218			210.63	13.983			210.63	22.0238			206.958
214.629	33.2869			214.782	39.7115			214.782	20.6256			427.333	26.7895			180.209	31.7057			179.47	29.8191			210.97	6.06556			216.49	41.7577			211.241	15.3904	99.6962			212.302	32.2226			212.302	11.3461			212.302	17.6704			208.594
216.319	38.0905			216.473	46.6122			216.473	60.9357	0		430.701	31.3242			181.616	32.7344	0		180.883	24.6139			212.632	3.38919			218.194	22.4922			212.904	21.7887	77.6766			213.973	25.3984			213.973	15.3492			213.973	25.783			210.238
218.008	29.3804			218.164	35.3046			218.164	28.6876	100		434.069	31.3397			183.037	32.4712	100		182.296	35.6291			214.293	5.087			219.899	43.6216			214.568	22.891	56.3233			215.645	68.5248			215.645	15.234			215.645	25.7187			211.882
219.698	30.107			219.856	33.7977			219.856	13.5239			437.429	30.5164			184.452	34.0321			183.709	32.2914			215.954	4.49011			221.604	58.0465			216.231	42.8769	30.7024			217.317	71.9	100		217.317	13.4244			217.317	11.5905			213.525
221.388	28.4185			221.547	27.6883			221.547	27.2682			440.797	30.4499			185.872	31.3661			185.122	44.2794			217.615	7.24355			223.308	74.9335			217.894	48.6043	33.8001			218.988	60.6811	0		218.988	9.57913			218.988	22.3429	100		215.17
223.079	28.618			223.238	31.2223			223.238	19.2125	0		444.161	24.431			187.293	32.1287			186.536	50.1145			219.276	7.66449			225.012	44.1227			219.557	54.3989	6.36835			220.66	45.0525			220.66	12.7082			220.66	14.4187	0		216.806
224.769	25.8889			224.929	32.1497			224.929	17.5408	100		447.529	32.9687			188.713	29.4725			187.949	56.8221			220.938	7.92031			226.718	54.7644			221.221	64.1751	33.3169			222.332	37.762			222.332	10.1209			222.332	13.3636			218.45
226.459	17.3089			226.62	32.7511			226.62	66.0452			450.889	23.8269			190.141	29.1952			189.362	57.0679			222.599	9.99698			228.422	49.5752			222.884	43.2671	30.1039			224.003	34.1058			224.003	12.6704			224.003	11.1603			220.094
228.148	27.7208			228.311	26.1862			228.311	81.2207			454.253	31.1464			191.549	32.3381			190.775	74.6269			224.26	7.87961			230.127	46.3485			224.547	57.5403	11.3549			225.675	31.1581			225.675	12.802			225.675	3.70387			221.738
229.838	24.6069			230.003	23.8088			230.003	35.0207			457.621	26.5998			192.968	30.0889			192.188	74.1463			225.921	4.27691			231.832	34.4967	100		226.211	28.3927	21.9453			227.347	43.2191			227.347	16.2709			227.347	5.29758			223.382
231.528	21.6987			231.694	29.9117			231.694	25.4581			460.981	12.7603			194.397	37.0634			193.601	72.1178	0		227.582	8.47197			233.536	3.78316	0		227.875	26.1598	24.9139			229.018	31.1062			229.018	11.2448			229.018	12.1201			225.026
233.219	14.7232			233.385	18.4972			233.385	21.7456			464.349	26.8959			195.805	31.9877	0		195.015	70.0604	100		229.243	5.84502			235.241	38.531			229.537	25.3937	35.9145			230.69	36.1659			230.69	12.1817			230.69	16.5104			226.662
234.908	24.1446			235.076	7.00664			235.076	10.5985			467.717	25.9535			197.224	36.8105	100		196.428	56.7199			230.905	6.77499	100		236.945	26.1228			231.201	15.5955	25.9433			232.361	23.388			232.361	11.5577			232.361	20.7182			228.306
236.598	22.0254			236.767	9.63718			236.767	16.3115			471.077	45.1949			198.645	31.649			197.841	56.6308			232.566	9.8248	0		238.65	41.7577			232.864	20.6067	22.6402			234.033	33.6156			234.033	14.6187			234.033	17.553			229.95
238.287	17.5215			238.459	20.4444			238.459	12.4523			474.441	49.1864			200.065	37.7477			199.254	49.1017			234.227	7.11498			240.355	57.49			234.527	5.07162	44.9889			235.706	28.5363			235.706	13.037			235.706	18.3109			231.594
239.977	23.9197			240.15	14.2616			240.15	20.2226			477.809	45.8417			201.48	33.827			200.668	46.3135			235.888	10.8857			242.059	20.3987			236.19	21.3726	42.1725			237.376	21.4098			237.376	13.6209			237.376	15.1148			233.238
241.668	23.4356			241.841	21.0102			241.841	8.2459			481.169	26.6102			202.9	39.8708			202.08	42.4297			237.549	7.62294			243.764	17.6515			237.855	6.63605	27.1011			239.048	22.1613			239.048	11.4786			239.048	9.96935	100		234.874
243.358	18.6419			243.532	13.6169			243.532	15.4062			484.537	24.452			204.329	39.5105			203.493	39.7961			239.21	6.77814			245.469	17.9784			239.517	3.70842	45.8603			240.72	24.0963			240.72	11.7831			240.72	13.4811	0		236.518
245.048	8.90862			245.223	7.35361			245.223	13.9101			487.905	24.1582			205.737	37.3863			204.907	45.4419			240.872	9.99276			247.173	31.7495			241.18	14.3504	37.3827	100		242.391	16.9633			242.391	9.47964			242.391	22.7109			238.162
246.738	19.5894			246.914	19.212			246.914	10.7365			491.265	22.1015	0		207.157	40.746			206.32	43.436			242.533	9.19535			248.878	22.3949			242.844	11.7187	57.9137	0		244.063	17.7645	100		244.063	11.4992			244.063	23.4313			239.806
248.427	16.1121			248.606	15.1999			248.606	9.5922			494.633	28.5925	100		208.576	38.783			207.733	52.6606			244.194	10.0369			250.583	21.8385			244.507	7.89802	89.3197			245.736	19.1919	0		245.736	14.7398			245.736	50.6019			241.45
250.118	20.6356			250.297	7.18179			250.297	11.985			498.001	26.0526			209.996	43.4106			209.146	43.3789			245.855	11.1418			252.287	21.8385			246.171	0.834815	59.6262			247.406	31.8362			247.406	13.7517			247.406	60.6168			243.093
251.808	12.8782			251.988	12.1123			251.988	9.53191			501.361	67.935			211.413	44.5956			210.56	40.3192			247.516	8.60114			253.992	39.0105			247.835	9.20545	32.6999			249.078	29.9919			249.078	11.759			249.078	40.3879			244.73
253.498	29.2376			253.679	11.493	0		253.679	7.35306			504.729	67.5392			212.833	54.5925			211.972	44.6564			249.178	6.6932			255.696	32.4032			249.497	12.0399	34.6038			250.75	49.6632			250.75	17.2371			250.75	26.3282			246.374
255.188	27.9936			255.37	7.62505	100		255.37	5.72277			508.097	58.7777			214.26	46.8402			213.386	42.5688			250.839	10.4999			257.401	3.22672			251.16	21.0099	47.7677			252.421	43.6444	100		252.421	15.9475			252.421	26.9378			248.018
256.878	15.1822			257.062	7.6217			257.062	2.58835			511.457	49.3494			215.669	47.5795			214.799	49.8324	0		252.501	10.7979			259.106	31.9791			252.823	7.44514	40.0941			254.094	49.808	0		254.094	14.64			254.094	22.8349			249.662
258.567	17.815			258.753	15.4197			258.753	12.0444			514.825	36.115			217.089	54.0164			216.212	45.4629	100		254.161	13.2558			260.81	28.119			254.487	19.3621	76.6917			255.766	69.7297			255.766	12.9638			255.766	29.979			251.306
260.258	10.0526			260.444	10.9406			260.444	7.05832			518.193	41.4707			218.517	48.6672			217.625	52.8919			255.822	9.27706			262.515	26.5819			256.151	9.50942	48.2509			257.436	61.154			257.436	12.7318	100		257.436	46.589	100		252.942
261.948	26.9654			262.135	21.1346			262.135	8.8967			521.553	27.9045			219.928	57.4561			219.038	33.0786			257.483	12.4089			264.22	30.3097			257.814	9.09324	54.6193			259.108	54.0772			259.108	16.1704	0		259.108	56.8083	0		254.586
263.638	13.974			263.826	21.9522			263.826	14.7971			524.917	36.9436			221.345	53.4356			220.452	38.6046			259.145	7.75289			265.924	36.3606			259.477	4.28647	73.9685	100		260.78	77.6207			260.78	18.9262			260.78	46.3809			256.23
265.328	12.5245			265.518	24.7923			265.518	7.76524			528.285	19.3659			222.765	61.4511			221.864	46.6121			260.806	8.81035			267.629	10.0098			261.14	20.3522	45.9569	0		262.451	52.829			262.451	14.5109			262.451	90.4742			257.874
267.018	22.5925			267.209	16.9381			267.209	11.7561			531.645	18.6996	0		224.185	57.4109	0		223.278	34.4263			262.468	12.1943			269.334	41.9873			262.803	15.9943	41.8826			264.124	48.2097			264.124	18.6934			264.124	60.7405			259.518
268.708	11.3012			268.9	32.9604			268.9	14.259			535.013	26.0395	100		225.605	63.0292	100		224.691	30.1602			264.128	9.05987			271.038	15.4608			264.468	21.3965	42.8934			265.796	45.4996			265.796	15.0625			265.796	47.9931			261.154
270.398	20.0612			270.591	23.5596			270.591	7.57239			538.381	26.8494			227.021	59.828			226.104	16.4374			265.789	5.72068			272.744	30.8662			266.131	26.9625	38.9903			267.466	47.495			267.466	17.9388			267.466	51.2424			262.797
272.088	9.82435			272.282	19.9157			272.282	12.0831			541.741	19.211			228.448	64.6375			227.517	28.7017			267.451	8.09722			274.448	19.1886	100		267.794	33.8807	42.0657			269.138	51.0258			269.138	19.6801			269.138	31.6627			264.442
273.778	20.7665			273.973	30.6136			273.973	14.3172			545.109	25.8152			229.861	59.1783			228.93	13.6474			269.112	5.5139			276.152	21.6859	0		269.456	47.4223	42.7762			270.81	54.9217			270.81	13.9492			270.81	34.1749			266.086
275.468	24.4873			275.665	29.9371			275.665	15.4691			548.477	23.3323			231.277	60.3067			230.344	18.2858			270.773	11.3074			277.857	37.4735			271.12	58.4462	9.87471			272.482	49.9633			272.482	17.6369			272.482	36.0279			267.73
277.158	32.5647			277.356	24.9858			277.356	16.5976			551.837	26.6874			232.697	62.8575			231.757	12.6008			272.435	9.36177			279.561	32.7301			272.783	62.5214	37.693			274.154	42.4697			274.154	15.0199			274.154	24.5795			269.374
278.848	18.5891			279.047	26.3515			279.047	13.1784			555.205	35.2068			234.117	64.2094			233.17	7.75441			274.095	9.99491			281.266	47.7113			274.447	75.325	56.9337			275.825	38.682			275.825	12.7573			275.825	25.1091			271.01
280.538	18.984			280.738	35.2195			280.738	11.8771			558.573	19.9873			235.533	57.5904			234.583	20.8708			275.756	8.55429			282.972	19.8423			276.111	58.9294	56.1419			277.496	40.5845			277.496	11.6819			277.496	23.6794			272.654
282.228	12.175			282.429	43.4415	0		282.429	18.1834	0		561.933	20.5249			236.953	70.428	0		235.996	26.0516			277.418	7.79175			284.675	32.884			277.774	59.7255	22.8677			279.168	21.9821			279.168	14.2007			279.168	17.3024			274.298
283.918	19.2459	0		284.121	44.7426	100		284.121	77.3525	100		565.301	27.7871			238.385	65.4523	100		237.409	22.3048			279.079	8.55084			286.38	40.7771			279.436	33.7059	43.6748			280.839	26.5971			280.839	10.3835			280.839	23.4689			275.942
285.608	25.06	100		285.812	43.8799			285.812	51.6436			568.669	18.6175			239.793	72.2983			238.822	23.2629			280.74	9.40486			288.085	32.5355			281.1	41.7418	44.1868			282.512	29.6162			282.512	14.453			282.512	23.562			277.586
287.299	30.4817			287.503	54.9253			287.503	47.2546			572.029	26.5657			241.208	71.9412			240.237	15.9767			282.402	6.86523			289.789	39.2401			282.764	28.6773	30.799			284.184	29.3763			284.184	14.8231			284.184	12.754			279.222
288.988	36.2867			289.194	49.0322			289.194	24.1445			575.397	12.2673			242.636	68.6227			241.649	21.417			284.062	11.1783			291.495	39.2401			284.427	36.9893	12.6604			285.855	52.3712			285.855	14.012			285.855	26.6031			280.866
290.678	34.3212			290.885	34.3039			290.885	14.5373			578.761	24.7479			244.048	72.3085			243.062	14.8005	0		285.723	15.6674			293.2	32.1533			286.091	35.4515	23.1133			287.526	47.4885			287.526	13.6978			287.526	9.4957			282.51
292.368	20.3534			292.577	51.2509			292.577	15.5194			582.129	27.8385			245.465	68.4555			244.475	23.0195	100		287.385	10.8473			294.903	30.5393			287.754	35.5227	36.1079			289.198	43.1845			289.198	10.0748			289.198	15.9593			284.154
294.057	4.2847			294.268	36.355			294.268	13.073			585.489	35.3042			246.884	69.1523			245.888	34.7746			289.046	12.5404			296.608	32.9597			289.416	31.1778	58.3616			290.87	36.6498			290.87	10.5255			290.87	19.4126			285.798
295.748	19.2562			295.959	42.7325			295.959	17.2872			588.857	68.9497			248.305	66.7118			247.301	21.9723			290.707	11.5189			298.312	20.6283			291.079	30.7264	38.2712			292.542	36.2092			292.542	15.3234			292.542	28.3609			287.442
297.438	26.0464			297.65	42.7535			297.65	19.7257			592.225	98.8217			249.725	71.1389			248.714	14.6092			292.369	6.90886			300.018	41.104			292.744	30.0474	28.9882			294.214	34.9675			294.214	14.4317			294.214	22.436	100		289.078
299.127	23.87			299.341	47.9061	0		299.341	14.6513			595.581	86.6252			251.141	73.6845			250.129	10.5622			294.029	11.4031			301.723	36.3606			294.407	29.8726	45.9467			295.885	31.5942			295.885	13.0843			295.885	55.1503	0		290.721
300.817	23.9567			301.033	48.3628	100		301.033	31.0646			598.949	79.9206			252.568	70.4646			251.541	21.6472			295.691	10.1222			303.427	20.9552			296.07	20.816	68.5785			297.556	37.7208			297.556	12.2884			297.556	21.9439			292.366
302.507	24.6643			302.724	51.129			302.724	22.3228			602.317	61.9308			253.981	71.4508			252.954	16.6638			297.352	9.27499	100		305.131	35.1504			297.734	14.2299	41.7453	100		299.228	42.9189			299.228	13.8202			299.228	21.2902			294.01
304.198	24.292			304.415	54.022			304.415	13.1509			605.677	31.7499			255.401	73.8045			254.367	13.7739			299.013	21.3862	0		306.836	7.74055			299.396	12.3894	50.9519	0		300.9	37.8007			300.9	13.5325			300.9	31.5883			295.654
305.888	12.6519			306.106	58.2191			306.106	19.8616			609.045	27.9359			256.816	71.3533			255.78	15.8946			300.674	41.4666			308.54	20.7256			301.059	15.8002	40.1803			302.572	33.5119			302.572	11.5217			302.572	42.4981			297.29
307.578	12.5592			307.797	55.7147	0		307.797	17.2413			612.413	32.798			258.237	77.4408			257.193	16.4135			302.336	60.7511			310.246	40.2207			302.724	6.21304	42.3658			304.244	34.6241			304.244	11.9543			304.244	74.3588			298.934
309.267	22.1084			309.488	48.5615	100		309.488	17.9851	0		615.769	24.6784			259.656	81.4325			258.607	18.201			303.996	52.5661			311.951	26.0255	100		304.387	0	25.043			305.915	34.3972			305.915	16.4091			305.915	53.191			300.578
310.957	26.0711			311.18	49.4495			311.18	16.8731	100		619.137	16.1165			261.073	85.3171			260.021	15.8409			305.658	34.5981	100		313.655	34.1698	0		306.05	6.57542	32.2029			307.586	28.3786			307.586	13.3998			307.586	42.015			302.222
312.647	29.7768			312.871	47.7747			312.871	16.1066			622.505	23.1778			262.505	84.0346			261.433	21.4385			307.319	32.6535	0		315.359	24.2588			307.713	11.725	15.7479			309.259	36.3841	100		309.259	12.2813			309.259	53.4374			303.866
314.338	22.8788			314.562	57.9179			314.562	15.9118			625.865	26.7165			263.913	87.7674			262.846	32.3145			308.98	18.9291			317.064	20.9552			309.376	11.3022	20.2309			310.93	31.7411	0		310.93	13.4919			310.93	35.8861			305.51
316.028	25.9595			316.253	54.3376			316.253	25.0517			629.233	31.2485			265.332	91.4529			264.259	31.9408			310.642	23.3721			318.769	63.0817			311.04	11.0193	40.4041			312.602	31.0761			312.602	14.9648			312.602	36.5356			307.146
317.718	36.9622	0		317.944	55.8892			317.944	21.5524			632.601	23.1505			266.76	92.1343			265.672	24.503			312.303	48.5425			320.474	69.9186			312.703	7.96478	25.3327			314.274	23.4809			314.274	11.7245			314.274	28.4784			308.79
319.407	25.8564	100		319.635	63.5927			319.635	52.0966	0		635.961	37.3745			268.168	84.0661			267.086	22.3023			313.964	65.3254			322.178	100			314.367	5.13226	39.8683	100		315.945	32.7107			315.945	14.194			315.945	31.2756			310.434
321.097	41.9268			321.327	61.1069			321.327	59.0443	100		639.329	26.4464			269.588	89.8308			268.499	27.2663			315.625	36.1189	100		323.883	48.2328			316.03	12.2559	38.5611	0		317.616	42.7051			317.616	12.6222			317.616	23.3514			312.078
322.788	25.0759			323.018	48.1561			323.018	55.9557			642.697	30.2896			271.005	92.5159			269.913	31.3519	0		317.286	21.8155	0		325.587	56.2798			317.693	7.22706	24.7104			319.289	37.5503			319.289	11.4514			319.289	15.4088			313.722
324.478	37.5873			324.709	45.599			324.709	33.3382			646.057	25.5652			272.425	91.5496			271.325	31.6132	100		318.947	8.08912			327.292	49.6522			319.356	17.8688	48.9478			320.96	36.842			320.96	10.0827			320.96	16.2008			315.358
326.168	32.6787			326.4	34.1991			326.4	50.4286			649.425	28.9431			273.844	77.8976			272.738	33.3294			320.609	7.41497			328.997	46.828			321.02	20.2507	14.7713			322.632	65.2031			322.632	11.5966			322.632	13.6385			317.002
327.858	20.1464			328.091	35.3331			328.091	89.7392			652.793	25.3936			275.264	85.0204			274.151	42.7421			322.27	2.11845			330.702	29.9829			322.683	56.291	43.0728			324.303	86.1163			324.303	9.24048			324.303	13.8557			318.646
329.547	20.4622			329.783	47.1073			329.783	84.2241			656.153	20.8461			276.692	79.3921			275.564	53.4437			323.931	7.07421			332.406	41.104	100		324.346	54.8757	26.801			325.975	47.9462			325.975	10.5894			325.975	17.5839			320.29
331.237	27.7373			331.474	34.4915			331.474	26.0124			659.521	26.1362			278.1	87.2423			276.978	46.2234			325.592	7.66633			334.11	42.8356	0		326.01	61.7314	13.3471			327.647	40.5476			327.647	10.3833			327.647	16.8569			321.934
332.928	34.7343			333.165	39.793			333.165	19.0738			662.889	23.9529	0		279.52	72.1965			278.391	55.5466			327.253	7.54015			335.815	61.5243			327.673	68.5513	29.4935			329.318	45.5837			329.318	10.4904			329.318	11.6059	100		323.578
334.618	39.8071			334.856	25.3655			334.856	11.8514			666.249	20.0482	100		280.941	75.6512			279.805	44.0908			328.914	10.5117			337.52	63.5409			329.336	60.9379	26.3076			330.99	45.4671			330.99	12.4097			330.99	20.5608	0		325.214
336.308	17.9653			336.547	23.1765			336.547	14.6997			669.613	31.6844			282.356	69.6717			281.217	39.8898			330.576	10.3753			339.225	59.8131			331	37.1967	24.529			332.662	48.0931			332.662	15.2995			332.662	18.5215			326.858
337.997	20.4936			338.239	22.6146			338.239	17.1031			672.981	22.726			283.776	72.0942			282.63	51.3594			332.237	9.27337	100		340.929	20.8998			332.663	38.5667	10.7547			334.333	31.2615	100		334.333	17.7639			334.333	27.8223			328.502
339.687	30.9077	0		339.93	15.0709			339.93	11.944			676.337	26.0795			285.196	64.0761			284.043	60.8696	0		333.898	8.42619	0		342.634	21.2821			334.326	41.4464	58.1341			336.005	34.2807	0		336.005	15.5462			336.005	32.5656			330.146
341.378	36.6668	100		341.621	11.2208			341.621	12.3639			679.705	30.188			286.625	72.9085			285.457	65.2586	100		335.559	13.8519			344.338	28.2162			335.99	13.1684	36.1823			337.677	43.6251			337.677	15.575	100		337.677	53.9555			331.79
343.068	35.7669			343.312	16.267			343.312	13.054			683.073	25.4884			288.032	66.3668			286.87	52.3295			337.22	24.0622			346.043	27.2356			337.653	22.9084	50.964			339.348	35.0451			339.348	17.8884	0		339.348	78.0161			333.426
344.758	48.9768			345.003	12.2865			345.003	14.6038			686.433	17.745			289.452	64.9299			288.283	49.2873			338.881	21.7696			347.748	12.484			339.316	17.7676	52.2388			341.02	43.975			341.02	17.8997			341.02	77.2141			335.07
346.448	61.9663			346.695	4.14952			346.695	20.2259			689.801	24.8419			290.872	67.0548			289.697	55.8165			340.543	15.2057			349.453	22.0681			340.979	16.5792	50.3348	100		342.692	36.7382			342.692	16.055			342.692	51.7279			336.714
348.137	70.2352			348.386	8.8057			348.386	14.2259			693.169	28.2385			292.288	67.0447			291.109	56.3162			342.205	14.525			351.157	21.5116			342.643	22.3328	26.7044	0		344.363	35.1856			344.363	20.4153			344.363	42.365			338.358
349.827	71.5996			350.077	14.8996			350.077	11.9886			696.529	20.092			293.709	69.1563			292.522	37.3151			343.865	14.8242			352.862	35.38			344.306	22.6888	29.1934			346.035	22.9409			346.035	20.2882			346.035	38.1537			340.002
351.518	51.4147			351.768	8.0052			351.768	9.01693			699.897	25.71			295.129	70.2868			293.935	42.208			345.526	6.99088			354.566	14.6747			345.969	10.4026	26.0075			347.707	17.3996			347.707	23.158			347.707	51.0458			341.638
353.207	38.0253			353.459	15.1111			353.459	10.53			703.265	30.8646			296.549	60.4294			295.349	48.9543			347.187	11.6463	100		356.271	14.4248			347.633	9.57617	78.9754			349.378	22.483			349.378	23.2544			349.378	34.5805			343.282
354.897	31.0573			355.15	15.0218			355.15	7.70079			706.625	20.2399			297.965	70.0195			296.762	33.3823			348.848	16.0518	0		357.976	36.8198			349.296	9.45562	48.4442			351.05	34.9285			351.05	29.8274			351.05	45.8364			344.926
356.587	38.4438			356.842	15.9969			356.842	18.9412			709.993	21.739			299.384	66.4702			298.175	35.2251			350.51	29.5619			359.681	47.9409			350.959	10.6315	18.4082			352.722	39.3425			352.722	36.3208			352.722	32.7762			346.57
358.276	33.5593			358.533	12.5007			358.533	17.0176			713.357	31.8605			300.812	59.9856			299.588	40.4147			352.172	38.4969			361.385	33.9402			352.623	19.5306	11.9655			354.393	36.3019			354.393	33.0726			354.393	32.5346			348.214
359.967	44.5773			360.224	10.7378			360.224	10.4874			716.725	21.3163			302.22	58.8228			301.001	49.8521			353.832	32.2264			363.09	33.1892			354.286	8.2604	25.3208			356.066	22.494			356.066	34.675			356.066	38.9673	100		349.858
361.657	38.1851			361.915	21.1362			361.915	13.9527			720.085	23.1568	0		303.641	64.6688			302.414	41.4166			355.493	31.7187			364.794	25.6986			355.949	11.8636	17.7353			357.737	30.3957			357.737	30.5692			357.737	44.2683	0		351.494
363.347	36.3012			363.606	19.4269			363.606	14.0819			723.453	23.4412	100		305.061	61.4038			303.828	40.3595			357.154	38.1171			366.499	36.8198			357.614	5.8509	44.1359			359.408	33.6761			359.408	24.9641			359.408	52.4459			353.138
365.037	22.1904			365.298	19.0385			365.298	18.6203			726.821	18.7904			306.481	61.6964			305.241	52.3657			358.815	25.7938	100		368.204	18.208			359.276	10.3359	37.7574			361.08	30.292			361.08	24.5305			361.08	61.6472			354.782
366.727	42.121	0		366.989	13.979			366.989	15.1295			730.181	31.592			307.896	58.8858			306.654	46.2645			360.478	15.5859	0		369.908	22.4922			360.939	28.5566	39.1715			362.752	32.3954			362.752	24.415			362.752	71.7681			356.426
368.416	22.7067	100		368.68	10.8982			368.68	15.0627			733.549	42.1234			309.316	56.2069			308.067	52.0917			362.139	7.62217			371.613	33.1339			362.602	21.3901	25.4295	100		364.423	31.8059			364.423	23.5012			364.423	61.9419	100		358.07
370.107	31.1257			370.371	16.1126	0		370.371	9.2516			736.917	35.2296			310.744	53.3564			309.48	42.5215	0		363.799	19.5223			373.318	21.7412			364.266	15.854	47.5677	0		366.096	25.3769			366.096	22.1872			366.096	45.9875	0		359.706
371.797	18.9334			372.062	22.9925	100		372.062	17.2286			740.273	42.7136			312.152	46.8979			310.893	31.5958	100		365.46	14.3128			375.022	32.7301			365.929	24.8027	48.6698			367.766	41.5389			367.766	21.2201			367.766	44.9363			361.35
373.487	6.84502			373.754	6.14106			373.754	13.1176			743.641	34.8513			313.573	55.3369			312.307	24.8013			367.121	21.6005			376.727	19.8773			367.593	29.7926	30.3938			369.438	30.1192			369.438	22.3474			369.438	78.5572			362.994
375.177	33.2426			375.445	25.0159			375.445	17.4458			747.009	34.4331			314.993	49.0069			313.72	24.0113			368.783	34.8572			378.432	20.6283			369.256	15.1295	4.06588			371.11	18.2547			371.11	17.6031			371.11	62.0528			364.638
376.867	19.8506			377.136	15.744			377.136	7.82423			750.369	31.7993			316.413	46.0082			315.133	20.4319			370.445	36.5049			380.136	21.2821			370.919	28.7184	22.803			372.781	29.3677			372.781	21.8828			372.781	51.911			366.282
378.557	19.3051			378.827	23.2153			378.827	13.2477			753.737	29.8862			317.833	48.0687			316.546	26.9539			372.106	24.2262			381.841	21.6859			372.582	35.1366	32.7743	100		374.453	21.9929			374.453	17.5316			374.453	30.8057			367.926
380.247	17.9405			380.518	22.8061			380.518	21.0968			757.105	21.3592			319.248	45.414			317.959	35.6624			373.766	41.9277			383.546	42.3142			374.246	54.2138	97.1296	0		376.126	29.2664			376.126	17.4365			376.126	35.8795			369.562
381.937	14.5599			382.209	17.4893			382.209	14.0674			760.465	24.0993			320.669	42.1916			319.372	42.856			375.427	21.5966			385.25	15.3285			375.91	64.6702	66.788			377.796	30.4605			377.796	17.6284			377.796	28.7664			371.206
383.627	22.774			383.901	22.4107			383.901	14.9706			763.829	15.3163			322.085	40.53			320.786	34.8813			377.088	16.727			386.955	26.0255			377.573	48.5143	92.4228			379.468	22.7337			379.468	18.9985			379.468	62.6814			372.85
385.317	29.4703			385.592	19.9948			385.592	10.8611			767.197	19.5237			323.505	39.1763			322.199	25.5758			378.75	12.2004			388.659	25.7755			379.235	66.9267	22.7182			381.14	24.2929			381.14	14.8358			381.14	55.5558			374.494
387.008	24.6745			387.283	18.9002			387.283	15.239			770.557	25.9035			324.932	40.3875			323.612	25.9445			380.412	9.06041			390.364	29.8302			380.899	53.9722	17.9591			382.811	18.0582			382.811	17.6463			382.811	40.8178			376.138
388.697	39.3246			388.974	27.9976			388.974	15.2196			773.925	18.3528			326.345	40.0793			325.025	25.6237			382.073	12.4941			392.069	29.0995			382.562	57.553	31.5162	100		384.484	32.4602	100		384.484	18.0007			384.484	25.7587			377.774
390.387	23.6554			390.665	35.4619			390.665	14.7314			777.293	25.7337			327.765	39.6825			326.438	30.66			383.733	9.23106			393.774	31.8264			384.225	63.6085	27.0166	0		386.156	22.4335	0		386.156	13.9575	100		386.156	18.4906			379.418
392.077	17.0917			392.357	37.8897			392.357	16.2058			780.653	15.8498			329.18	35.4853			327.851	27.5698			385.394	13.0036			395.478	30.5393			385.89	35.7383	55.4368			387.826	27.6488			387.826	19.4088	0		387.826	19.0136			381.062
393.767	20.0895	0		394.048	25.3185			394.048	13.9591			784.017	26.0467			330.6	28.5103			329.264	31.7126			387.055	7.79228			397.183	17.4016			387.553	37.3583	65.4045			389.498	17.8185			389.498	17.5692			389.498	27.1018			382.706
395.458	12.5967	100		395.739	31.8052			395.739	16.1289			787.385	26.6694	0		332.017	34.3235			330.679	20.2444			388.718	9.15606			398.887	39.8938			389.215	19.9406	66.8901			391.17	16.486			391.17	15.3572			391.17	37.6216			384.35
397.148	17.6375			397.43	30.1723			397.43	21.462			790.745	29.851	100		333.437	34.0332			332.091	17.9381			390.379	15.543			400.592	22.6245			390.879	30.2114	41.822			392.842	18.706			392.842	12.0219			392.842	20.4433			385.994
398.837	19.6214			399.121	37.299			399.121	16.6388			794.109	29.5949			334.864	35.4599			333.504	20.8737			392.04	18.0886			402.298	31.4226			392.542	19.7526	43.1714			394.514	20.0472			394.514	41.1369			394.514	20.2417			387.63
400.527	17.9322			400.812	33.4846			400.812	12.5791			797.477	31.3045			336.276	31.6543			334.917	12.9562			393.7	23.7121			404.001	25.0449			394.206	25.1868	34.5732	100		396.186	27.4803			396.186	55.3181			396.186	23.4379			389.274
402.217	16.5302			402.504	39.1664			402.504	9.33325			800.837	51.8708			337.697	28.7328			336.33	18.103			395.361	16.9379			405.706	31.5199			395.869	20.883	27.4996	0		397.856	19.4641			397.856	52.4912			397.856	12.4016			390.918
403.907	17.1442			404.195	33.9508			404.195	12.8986			804.201	58.7126			339.112	32.5436			337.743	0			397.022	13.2568			407.41	28.3485			397.533	10.6985	35.1531			399.528	12.4952			399.528	38.5884			399.528	17.5839			392.562
405.598	37.872			405.886	32.349			405.886	6.87816			807.569	43.8188			340.533	30.6156			339.157	12.8498			398.685	11.2675			409.115	23.8347	100		399.195	19.2046	37.4709			401.2	29.6052			401.2	35.6821			401.2	29.416			394.206
407.288	34.2001	0		407.577	29.6671			407.577	19.8927			810.929	39.2959	0		341.953	34.2831			340.571	20.7559			400.346	12.8324			410.82	19.1886	0		400.858	16.3851	61.7812			402.872	25.9016			402.872	25.3608			402.872	20.3192			395.842
408.977	35.9803	100		409.268	34.7278			409.268	11.1631			814.297	18.5021	100		343.369	34.9805			341.983	14.212			402.007	7.37081			412.525	25.3717			402.522	6.85833	34.9598			404.544	29.1734			404.544	10.0593			404.544	0			397.486
410.667	36.2532			410.96	39.0319	0		410.96	16.1905			817.665	22.3727			344.796	33.414			343.396	21.204			403.667	9.27683	100		414.229	16.4414			404.186	8.39241	33.7936			406.216	19.4426			406.216	13.6054			406.216	19.2485			399.13
412.356	45.0332			412.651	40.0231	100		412.651	22.6537			821.025	22.1803			346.208	38.3815			344.809	16.8721			405.328	10.4208	0		415.934	23.932			405.849	6.5693	15.5259			407.886	21.8093			407.886	11.4871			407.886	11.1825			400.774
414.047	40.4281			414.342	44.3762			414.342	34.5417	0		824.393	30.9156			347.629	37.499			346.222	18.3724			406.99	10.165			417.638	46.2716			407.513	8.73086	39.0681			409.558	34.5725			409.558	17.5013			409.558	20.0687			402.418
415.737	70.42			416.033	50.8907			416.033	16.5505	100		827.761	18.8365			349.057	36.2748			347.635	14.995			408.652	16.7288			419.343	11.6007			409.175	8.95949	47.6304			411.23	18.963			411.23	19.0759			411.23	9.47134			404.062
417.427	72.8524			417.724	50.1448			417.724	16.5403			831.121	23.8053			350.465	42.4248			349.049	7.80433			410.313	14.226			421.049	32.4032			410.838	8.3208	31.6027			412.902	30.7327			412.902	18.6025			412.902	21.8664			405.698
419.116	70.7668			419.417	57.465			419.417	54.9286			834.489	27.7923			351.885	41.2733			350.463	25.1658			411.974	16.2199			422.753	28.119			412.502	12.2622	38.4746			414.574	17.6737			414.574	18.4081	100		414.574	24.3355			407.342
420.806	69.879			421.108	63.4754			421.108	87.1092			837.857	29.2851			353.3	35.268	0		351.875	15.7252			413.634	13.5542			424.457	17.6515			414.166	13.1144	36.1908			416.245	23.6104			416.245	20.5276	0		416.245	20.3967			408.986
422.497	64.1257			422.799	70.5115			422.799	85.1889			841.213	19.7604			354.72	45.921	100		353.288	30.6			415.295	15.247			426.161	17.9784			415.829	5.01806	25.409	100		417.916	27.5128			417.916	21.585			417.916	24.493			410.63
424.187	63.9947			424.49	77.8804			424.49	94.6032			844.581	22.7887			356.14	40.8229			354.701	17.4694	0		416.957	24.436			427.866	14.2506			417.492	10.2083	26.7163	0		419.588	26.8972			419.588	23.357			419.588	27.4233			412.274
425.877	42.4361			426.181	84.807			426.181	64.4329			847.949	21.5511			357.561	41.3483			356.114	25.8868	100		418.619	19.2648			429.571	31.6522			419.155	4.41386	30.1988			421.26	27.5625	100		421.26	19.0682			421.26	19.1776			413.91
427.567	35.7504			427.872	100			427.872	17.0763			851.309	18.1077			358.988	38.5519			357.528	25.7975			420.28	14.6136			431.276	19.4182			420.818	19.2587	26.289			422.932	36.8268	0		422.932	26.1928			422.932	15.2388	100		415.554
429.256	31.8168			429.564	96.5988			429.564	15.7011			854.673	18.2317			360.397	44.6167			358.941	30.4511			421.941	9.78402			432.981	32.9597			422.482	25.5969	23.8864			424.604	31.5834			424.604	27.6864			424.604	31.0872	0		417.198
430.946	32.7929			431.255	84.4947			431.255	9.52904			858.041	25.474			361.817	47.5414			360.355	37.0153			423.601	13.3893			434.685	31.5199			424.146	41.086	75.0537			426.275	37.0773			426.275	26.6308			426.275	24.4065			418.841
432.637	23.5662			432.946	85.2483			432.946	15.6263			861.409	41.0837			363.237	51.0234			361.767	33.2535			425.262	14.6504			436.389	21.4563			425.809	41.3538	50.1279			427.946	41.9796			427.946	28.3916			427.946	43.5931			420.485
434.327	29.9971			434.637	77.0408			434.637	13.6114			864.769	16.5255	0		364.652	49.1219			363.18	25.6147			426.924	10.8857			438.094	44.6373			427.472	55.7885	69.2635	100		429.619	49.162			429.619	33.4985			429.619	48.179			422.122
436.017	27.806			436.328	77.1962			436.328	22.0665			868.137	26.9122	100		366.072	52.8322			364.593	20.0085			428.586	11.6487			439.8	23.3755			429.135	53.1695	64.0955	0		431.29	37.1789			431.29	42.669			431.29	74.4054			423.766
437.707	13.7328			438.02	59.2207	0		438.02	9.95102			871.505	31.0094			367.493	52.9802			366.006	14.8628			430.247	10.8008			441.504	10.0636			430.798	62.092	67.3967			432.962	26.908	100		432.962	47.8977			432.962	100			425.41
439.396	29.7514			439.711	55.8151	100		439.711	10.4391			874.865	24.4798			368.921	56.3191			367.42	24.948			431.908	6.30828			443.209	17.2274	100		432.462	47.8257	34.9819	100		434.634	27.8065	0		434.634	43.8163			434.634	68.8288			427.054
441.086	21.1964			441.402	71.9193			441.402	7.13756			878.233	18.0363			370.329	65.0073			368.833	23.3022			433.568	15.3716			444.913	47.5587	0		434.125	66.3765	57.8035	0		436.305	42.4372			436.305	51.2314			436.305	56.3097			428.698
442.777	20.077			443.093	55.4425			443.093	20.6615			881.601	19.722			371.748	59.6778			370.247	20.3835	0		435.23	12.6208			446.617	37.4735			435.789	71.5865	36.8707			437.976	47.3201			437.976	43.5106			437.976	34.0818			430.342
444.467	25.8466			444.784	46.6345			444.784	17.8736			884.957	12.1309			373.176	57.6366			371.659	26.8154	100		436.892	12.8343			448.322	10.3905			437.452	80.4273	16.2413			439.649	35.22			439.649	50.8172	100		439.649	38.2378			431.978
446.157	11.6927			446.476	52.2509			446.476	15.6594			888.325	16.8349			374.585	54.8165			373.072	15.9862			438.553	9.78479			450.027	17.0951			439.114	55.3462	4.45073			441.32	45.871			441.32	59.664	0		441.32	28.9704			433.622
447.847	13.0564			448.167	36.7513			448.167	14.513			891.693	17.691			376.005	58.7205	0		374.485	15.0902			440.214	9.86919			451.732	26.1228	100		440.779	50.3712	14.3339			442.992	45.0525			442.992	54.4806			442.992	36.4557			435.266
449.536	18.0006			449.858	37.3129			449.858	19.9244			895.049	9.76482			377.425	56.3105	100		375.899	16.5885			441.875	10.9275			453.437	66.1355	0		442.442	46.9863	49.4514			444.664	35.4814			444.664	65.9342			444.664	27.8104			436.91
451.227	19.2919			451.549	42.313			451.549	18.1549			898.417	18.1154			378.84	58.0657			377.312	19.3245			443.536	10.2116			455.14	61.4474			444.105	44.8619	27.6168			446.335	29.1906			446.335	76.6641			446.335	49.3362			438.554
452.917	8.13495			453.24	40.5529			453.24	9.77307	0		900	16.6369			380.26	54.5136			378.725	15.4304			445.197	10.4187			456.845	76.276			445.769	63.2611	9.97135			448.006	30.8966			448.006	75.2574			448.006	25.4372			440.19
454.607	21.6852			454.931	44.3989			454.931	17.8454	100						381.68	54.9157			380.139	9.50089			446.859	9.69777			458.551	45.9447			447.432	81.9654	30.2955			449.679	30.2444			449.679	72.9804			449.679	25.016	100		441.834
456.297	10.1424			456.623	48.3497			456.623	21.9624							383.108	61.8423			381.551	0.30779			448.52	10.1642			460.255	47.9059			449.094	69.1923	10.6701			451.35	31.6914			451.35	73.2864			451.35	52.0494	0		443.478
457.986	29.7759			458.314	47.5648			458.314	15.2439							384.517	58.9764			382.964	11.9669			450.181	10.1219			461.96	41.9873			450.758	46.4168	17.0247			453.022	35.0107			453.022	83.4358			453.022	62.1125			445.122
459.677	7.71186			460.005	46.2276			460.005	15.3162	0						385.937	57.8732			384.378	13.4476			451.842	18.8907			463.665	69.8213			452.422	35.5163	42.5712			454.694	28.5038			454.694	78.6851			454.694	37.6373			446.766
461.367	18.9053			461.696	48.121			461.696	19.6749	100						387.357	63.6087			385.791	15.4395			453.503	16.2616			465.368	43.6013			454.085	21.4202	57.205			456.365	37.6647			456.365	65.1585			456.365	54.8156			448.41
463.057	27.5862			463.387	40.3737			463.387	28.3481							388.777	60.6641			387.204	12.2271			455.164	17.3231			467.073	31.5199			455.748	28.5502	38.8629			458.037	18.0797			458.037	59.1708			458.037	64.8631			450.046
464.747	21.9278			465.079	37.4338			465.079	79.2756							390.192	67.1362			388.617	13.9068			456.826	19.0976			468.778	58.3733			457.412	23.828	52.6273			459.708	28.7978			459.708	52.0374			459.708	47.102			451.69
466.437	13.6236			466.77	34.4179			466.77	51.9387							391.612	67.7827			390.031	10.8119			458.487	24.9837			470.483	46.2716			459.074	12.2021	39.7513			461.38	24.4504			461.38	48.1346			461.38	42.9192			453.334
468.127	32.8293			468.46	38.2943			468.46	56.616							393.041	62.9914			391.443	19.9039			460.148	15.2036			472.188	53.7622			460.738	12.6459	51.3402			463.052	44.5083			463.052	40.4409			463.052	40.0599			454.978
469.816	27.3608	0		470.151	38.3658			470.151	21.7138							394.449	69.021			392.857	23.4627			461.809	15.8367			473.892	11.0442			462.402	10.5841	28.4846			464.723	33.5552			464.723	40.4882			464.723	51.0784			456.622
471.506	19.9371	100		471.843	36.9035			471.843	36.4127							395.868	75.0869			394.27	18.521	0		463.47	13.2955			475.596	24.8153			464.065	23.1654	24.5171			466.395	32.9181			466.395	37.0118			466.395	49.7133			458.258
473.196	14.3131			473.534	44.0458			473.534	73.2213							397.297	69.4594			395.683	21.7371	100		465.131	12.1138			477.302	15.6553			465.728	20.7016	36.384			468.067	23.1592			468.067	34.5984	100		468.067	48.3858			459.902
474.886	15.315			475.225	44.5607			475.225	56.4892							398.708	79.0847			397.096	28.468			466.793	16.9402			479.006	47.7113			467.391	16.989	24.9037			469.738	38.602			469.738	30.9167	0		469.738	26.6963			461.546
476.576	27.2511			476.916	41.868			476.916	31.897							400.128	79.8998			398.509	25.0002			468.454	9.4529			480.711	35.9364			469.055	16.1151	39.4919			471.41	36.5093			471.41	28.3031			471.41	27.3148			463.19
478.266	21.7238			478.606	36.15			478.606	16.4862							401.545	86.8796			399.923	29.7248			470.115	16.559			482.416	14.2941			470.718	3.40008	13.5404			473.082	34.1555			473.082	27.3516			473.082	29.2585			464.834
479.956	15.7161			480.297	45.1828			480.297	8.53827							402.965	82.2393			401.335	29.1084			471.777	14.1			484.119	33.6903			472.381	21.0104	27.9912			474.753	42.217			474.753	29.3487			474.753	33.9303			466.477
481.646	8.54207			481.988	33.9176			481.988	19.7005							404.38	83.0809			402.749	41.9821			473.437	16.5971	100		485.824	18.208			474.045	18.8486	29.9971			476.426	30.765			476.426	33.2354			476.426	19.6388			468.114
483.336	23.1587			483.68	40.7532			483.68	15.1618							405.8	85.5165			404.162	43.5883			475.098	13.5095	0		487.53	24.718			475.708	8.40513	28.6358			478.097	21.9647			478.097	37.3701			478.097	21.2384			469.758
485.026	11.1962			485.371	31.0412			485.371	15.1336							407.229	86.5606			405.575	38.0808			476.76	11.3069			489.234	34.9005			477.372	5.73623	18.9423			479.768	28.0849			479.768	41.4793			479.768	34.0509			471.402
486.716	11.585			487.062	36.3123			487.062	17.3764							408.64	86.2192			406.988	30.7361			478.421	16.8529			490.939	0			479.035	14.2492	19.1356			481.44	18.1727			481.44	41.169			481.44	27.408			473.046
488.406	26.4399			488.752	38.0035			488.752	16.7153							410.06	92.7206			408.401	36.8296			480.082	10.5883			492.643	23.3755			480.698	24.79	18.3319			483.112	17.4319			483.112	40.9452			483.112	37.1702			474.69
490.096	22.6469			490.443	34.2385			490.443	23.848							411.477	83.0046	0		409.815	34.7182			481.744	13.1272			494.347	29.3291			482.361	15.7334	29.0001	100		484.783	33.3434			484.783	36.4221			484.783	36.5137			476.326
491.786	36.5397			492.135	34.2533			492.135	16.4018							412.896	86.055	100		411.228	30.8111			483.404	17.1958			496.053	33.2865			484.025	19.4937	29.385	0		486.456	24.39			486.456	37.7382			486.456	30.6441			477.97
493.476	21.5051			493.826	39.0103			493.826	17.2237							414.313	91.4118			412.641	41.552			485.065	13.4246			497.757	24.9126			485.688	3.25997	23.5863			488.127	16.8488			488.127	32.6158			488.127	35.7155			479.614
495.166	19.0217			495.517	23.0404			495.517	14.0356							415.733	83.2358			414.054	33.349			486.727	16.4741			499.462	20.9552			487.351	13.4753	6.55339			489.798	16.6652			489.798	27.8615			489.798	29.7596			481.258
496.857	26.8676			497.208	42.1826			497.208	15.6367							417.161	83.058			415.467	28.1231			488.388	18.6743			501.167	20.9552			489.014	15.3647	13.7235			491.47	21.2523			491.47	24.2555			491.47	17.4821			482.902
498.546	22.6682			498.898	33.6941			498.898	9.83462							418.572	86.3098			416.88	21.0976			490.05	18.0803			502.871	24.4331			490.678	29.5168	2.37206			493.142	13.3828			493.142	23.2652			493.142	39.435			484.546
500.236	24.9441			500.59	34.8243			500.59	28.2493							419.993	85.1306			418.293	29.885			491.711	15.6703			504.576	33.843			492.341	46.5034	6.96185			494.814	26.1545			494.814	20.7139			494.814	24.7192			486.182
501.926	26.1336	0		502.281	23.871			502.281	19.1304							421.408	87.6101			419.707	25.6524			493.371	16.4757			506.281	20.3015			494.004	62.3617	15.3308			496.486	16.9028			496.486	19.6116			496.486	29.5334			487.826
503.616	24.2077	100		503.972	47.7889			503.972	18.7033							422.829	86.9694			421.12	31.9711			495.033	16.8111			507.985	19.4951			495.668	85.1412	47.3337			498.157	22.3298			498.157	24.2412			498.157	35.4096			489.47
505.307	26.3526			505.663	31.3481	0		505.663	12.6728							424.245	96.8159			422.533	25.7223			496.694	12.7057			509.69	19.2655			497.332	71.6733	64.4635			499.828	25.066			499.828	25.2428			499.828	36.2851			491.114
506.997	23.7486			507.354	28.3123	100		507.354	11.1498							425.665	92.2024			423.946	36.9114			498.355	18.8007	100		511.394	16.4414			498.994	68.5881	31.4113			501.5	31.0003			501.5	19.9619			501.5	60.5963			492.757
508.686	22.2165			509.044	29.8021			509.044	10.9822							427.084	90.3017			425.359	43.5362			500.017	15.9211	0		513.099	36.5902			500.658	78.6233	8.15882			503.171	33.3219			503.171	19.4432			503.171	57.3779			494.393
510.376	21.8258			510.736	36.4783			510.736	10.3139							428.504	82.9547			426.772	37.402			501.678	9.6192			514.804	19.4182			502.321	43.7506	24.507			504.844	25.878			504.844	16.1495			504.844	44.0143	100		496.038
512.066	39.1267			512.427	41.0318			512.427	17.3158							429.924	92.1192	0		428.185	34.7318			503.338	12.9158			516.508	39.1428			503.984	27.7415	34.5853			506.516	27.4911			506.516	15.5855			506.516	49.7818	0		497.682
513.757	43.0539			514.118	31.9075			514.118	11.4195							431.353	90.2646	100		429.599	29.92			505	19.3117			518.213	26.9088			505.648	28.9796	19.9189			508.186	26.3034			508.186	10.9196			508.186	51.6038			499.326
515.447	62.4395	0		515.809	32.0847			515.809	13.355	0						432.761	97.9385			431.012	23.0937			506.661	25.6633			519.918	15.2312			507.312	15.9816	15.1376			509.858	22.2866			509.858	13.4571			509.858	45.3443			500.97
517.137	50.6772	100		517.499	33.4223			517.499	19.4029	100						434.181	85.9072			432.425	27.3879			508.322	33.9629			521.622	37.8004			508.974	22.145	19.3289			511.53	21.7639			511.53	13.4026			511.53	30.2361			502.606
518.826	64.6954			519.191	36.3982			519.191	23.1929							435.596	92.01			433.838	40.7312			509.984	45.183			523.328	26.1228			510.637	27.0657	35.3973			513.202	24.1288			513.202	13.7823			513.202	38.6524			504.25
520.516	53.6797			520.882	40.5359			520.882	36.466							437.016	90.8971			435.251	50.0197			511.645	66.5776	100		525.032	27.083	100		512.301	20.238	28.9017			514.874	26.908			514.874	13.5629			514.874	42.9127			505.894
522.206	52.1131			522.573	39.9226			522.573	50.6855							438.437	93.0093			436.664	49.3801			513.305	73.7219	0		526.736	24.3358	0		513.965	17.9556	23.9085			516.546	25.3984			516.546	14.0489			516.546	37.2536			507.537
523.897	60.7626			524.264	31.8533			524.264	25.4078							439.857	91.0255			438.077	53.2142			514.967	58.1511			528.441	34.4967			515.628	17.4725	5.55623			518.216	11.07			518.216	13.5167			518.216	39.3818			509.182
525.587	31.9151			525.955	43.1274			525.955	78.8092	0						441.284	97.8601			439.492	37.9844			516.628	66.1116			530.146	34.4967			517.292	18.1302	35.677			519.888	27.3594			519.888	12.5683			519.888	44.3114			510.826
527.277	32.5208			527.646	47.1994			527.646	100	100						442.692	96.1335			440.904	51.858	0		518.29	50.7796			531.85	25.3717			518.954	10.8731	48.5205			521.56	22.8589			521.56	10.8485			521.56	43.2407			512.462
528.965	50.3213			529.337	52.8587			529.337	66.1418							444.113	100			442.317	52.5113	100		519.951	31.3002			533.556	9.60445			520.617	11.9668	20.5191			523.232	16.7236			523.232	11.2214			523.232	54.5317			514.106
530.655	48.5454			531.028	58.8197			531.028	34.9084							445.532	92.1136			443.73	59.9567			521.612	33.5369			535.259	28.7727			522.28	22.6822	37.0707			524.904	21.5027			524.904	14.1548			524.904	47.2105			515.75
532.345	47.8719			532.719	72.3612			532.719	31.6052							446.949	88.3216			445.143	48.8054			523.272	26.0443			536.964	52.4197			523.944	9.20767	26.3941			526.576	23.3664			526.576	13.6587			526.576	47.656			517.394
534.036	78.038			534.41	72.667			534.41	18.3121							448.369	89.8177			446.556	47.3567			524.934	62.6508			538.669	78.1953			525.608	13.108	20.3258			528.246	21.8697			528.246	11.801			528.246	39.2953			519.038
535.726	51.6286			536.101	75.4594			536.101	14.4333							449.789	90.0204			447.97	52.4377			526.595	90.242			540.373	57.1631			527.271	17.9617	33.2118			529.918	15.8188			529.918	9.63856			529.918	45.3418			520.674
537.416	72.6406			537.792	85.6866			537.792	16.5749							451.204	82.2971			449.383	58.5258			528.257	71.585			542.079	69.1907			528.934	15.5048	33.5864	100		531.59	24.2432			531.59	7.70483			531.59	34.2174			522.318
539.105	59.9365			539.483	92.2372			539.483	14.6906							452.624	82.0931	0		450.796	56.2078			529.918	64.7191			543.784	38.5514			530.597	22.935	13.6389	0		533.262	20.2978			533.262	11.0238			533.262	43.3182			523.962
540.795	47.9487			541.174	85.919			541.174	11.3741							454.044	84.6118	100		452.209	42.4354			531.579	51.8385			545.487	41.7577			532.26	23.1654	20.5293			534.934	33.6761			534.934	12.2661	100		534.934	45.5108			525.606
542.486	38.7422	0		542.865	81.9943			542.865	8.41937							455.473	84.9685			453.622	49.2121	0		533.239	38.453			547.192	26.6792			533.925	14.1695	32.4725			536.606	25.0552			536.606	10.6061	0		536.606	43.3606			527.25
544.176	44.3957	100		544.556	71.2602			544.556	12.5247							456.88	81.459			455.035	52.1211	100		534.901	23.3322			548.897	20.6283			535.588	15.16	40.1738			538.276	25.2732			538.276	9.83365			538.276	50.2117			528.894
545.866	23.6607			546.247	69.2329			546.247	14.5056							458.301	79.5973			456.448	49.8266			536.563	18.3774			550.601	46.5984	100		537.251	32.9686	71.3121			539.948	17.5184			539.948	11.4892			539.948	29.1167			530.53
547.556	21.17			547.938	67.9719	0		547.938	15.7651							459.72	78.4205			457.862	53.5297			538.224	13.8953	100		552.307	30.8662	0		538.913	34.2497	57.5272			541.621	28.3246			541.621	8.08926			541.621	38.9738			532.174
549.245	21.7115			549.629	62.6435	100		549.629	10.0845							461.137	79.1867			459.275	52.8634			539.885	12.4131	0		554.01	13.1377			540.577	34.8539	40.9619			543.292	26.6489			543.292	8.5054			543.292	49.6952			533.818
550.936	19.0686			551.32	59.2869			551.32	14.7558							462.556	83.2043			460.689	62.738			541.546	12.789			555.715	31.7495			542.24	47.9707	30.6941			544.964	17.0065			544.964	10.513			544.964	43.2067			535.462
552.626	20.6875			553.011	55.504			553.011	16.6708							463.977	86.7895			462.101	61.9974			543.206	10.3359			557.42	29.7533			543.904	54.4964	33.3002			546.636	28.6682	100		546.636	7.81043			546.636	46.7031			537.106
554.316	20.4819			554.702	55.9826			554.702	18.6236							465.404	89.4028			463.514	54.3457			544.868	9.91335			559.124	33.1892			545.568	68.1975	6.82105	100		548.306	19.5353	0		548.306	7.22129			548.306	26.4547			538.742
556.006	15.2162			556.394	53.5895			556.394	17.3521							466.813	91.4518			464.927	53.5941	0		546.53	9.96009			560.83	24.4331			547.231	58.9773	26.684	0		549.979	24.5649			549.979	8.58617			549.979	36.4957			540.386
557.696	13.5588			558.084	43.1484			558.084	13.4137							468.232	93.6395			466.341	66.4899	100		548.191	12.3223			562.535	26.9088			548.893	56	25.3329			551.65	28.4068			551.65	6.06236			551.65	41.3471			542.03
559.386	7.25688			559.775	45.7093			559.775	11.906							469.653	87.6432			467.754	63.7775			549.852	11.899			564.238	33.2865			550.557	67.2899	21.4334			553.322	22.8309			553.322	7.57262			553.322	39.8958			543.674
561.077	7.0064			561.466	31.691			561.466	18.1739							471.068	89.1902			469.167	67.934			551.513	13.383			565.943	23.7024			552.221	49.9203	88.0345			554.994	13.1106			554.994	11.2983			554.994	44.8963			545.318
562.767	5.62563			563.157	34.5562			563.157	12.4961	0						472.488	90.8586			470.581	72.5952			553.174	12.4538			567.648	45.0614			553.884	44.8186	39.141			556.665	37.1853			556.665	10.3961			556.665	42.0616			546.962
564.457	25.6348			564.849	32.968			564.849	19.7168	100						473.909	89.1566			471.993	73.8374			554.835	11.6879			569.352	45.0614			555.548	43.1679	40.9416			558.336	32.5532			558.336	10.7725			558.336	31.1272			548.598
566.147	27.6912			566.54	34.1848			566.54	15.7887							475.337	83.852			473.407	69.904	0		556.497	13.468			571.058	43.1975			557.211	54.4964	21.7316			560.009	39.2995			560.009	9.10167			560.009	49.2806			550.242
567.837	9.45443			568.23	31.882			568.23	14.4296							476.745	77.3799			474.82	69.1578	100		558.158	10.6743			572.763	18.208			558.873	63.3004	26.7044			561.68	31.24			561.68	10.8791			561.68	37.2692			551.886
569.528	24.4067			569.921	41.367			569.921	17.8957							478.165	72.3224			476.233	77.4706			559.819	10.6772			574.466	24.5857			560.536	52.3648	39.3546			563.352	33.4689			563.352	7.66692			563.352	39.9563	100		553.529
571.218	21.4955			571.612	29.1419			571.612	11.3728							479.592	81.8499			477.646	66.9808			561.48	8.26031			576.171	25.3164	100		562.201	52.1258	0.892065			565.024	32.7928			565.024	9.81076			565.024	40.9022	0		555.174
572.908	13.2809			573.304	36.9868			573.304	18.1743							481	79.0379			479.059	58.5164			563.141	11.1392			577.875	26.3523	0		563.864	40.7821	26.918			566.695	21.453			566.695	7.81804			566.695	48.1546			556.81
574.598	13.7632			574.995	38.4372			574.995	11.4178							482.42	80.2576			480.473	57.2338			564.803	8.0468			579.581	24.2588			565.527	32.2028	23.6829			568.366	25.066			568.366	9.7895			568.366	45.2709			558.454
576.288	10.1017			576.686	32.5292			576.686	30.7846	0						483.84	75.119			481.885	61.1649			566.464	10.1213			581.286	7.08682			567.191	38.8037	17.0145			570.039	23.159			570.039	11.4873			570.039	51.2358			560.098
577.979	15.8686			578.376	31.4522			578.376	4.29099	100						485.261	79.5869			483.299	44.602			568.125	13.3856			582.99	23.0487			568.853	11.2873	28.4967			571.71	20.1637			571.71	11.0224			571.71	47.2261			561.742
579.669	16.9326			580.067	46.8769			580.067	10.1377							486.677	79.1777			484.712	36.9513			569.786	11.9429			584.694	17.9784			570.517	14.8512	22.6456			573.382	28.869			573.382	11.3297			573.382	40.3104			563.386
581.359	11.3769			581.759	35.9377			581.759	53.6345							488.096	69.9961			486.125	31.6686			571.447	11.9882			586.399	32.6328			572.181	15.438	10.6496			575.054	31.8771			575.054	10.6178			575.054	43.8503			565.03
583.049	19.8924			583.45	39.0037			583.45	85.1331							489.525	69.8486			487.538	30.5977			573.108	11.2228			588.103	29.656			573.844	20.2187	25.5904			576.725	21.995			576.725	10.2773			576.725	29.8837			566.666
584.739	25.2438			585.141	33.3773			585.141	72.293							490.936	66.729			488.951	31.2188			574.77	11.6482			589.809	38.9132	100		575.507	21.2518	38.1864			578.397	22.9647			578.397	11.8278			578.397	36.7372			568.31
586.429	17.6945			586.832	48.6457			586.832	94.5918							492.353	61.9611			490.365	39.664			576.431	17.7435			591.514	28.119	0		577.17	15.0693	44.2241			580.069	27.3551			580.069	12.7758			580.069	35.9792			569.954
588.119	7.01286			588.522	27.7879	0		588.522	89.628							493.772	63.765			491.777	39.0839	0		578.092	13.723			593.218	39.2401			578.833	27.3251	34.392			581.74	24.5434			581.74	8.74446			581.74	43.9278			571.598
589.809	8.16614			590.213	45.6888	100		590.213	75.9195							495.192	69.7746			493.191	41.1948	100		579.753	14.1857			594.922	31.7495			580.497	34.7935	35.282			583.412	30.156			583.412	8.54494			583.412	34.5739			573.242
591.499	20.2666			591.905	44.0719			591.905	90.7525							496.613	60.1971			494.604	22.6801			581.414	12.1998			596.626	46.5012			582.16	19.8626	19.7154			585.084	19.9932			585.084	10.3141			585.084	45.4683			574.878
593.189	18.1873	0		593.596	40.1072			593.596	51.9888							498.029	61.5706			496.017	30.8204			583.075	12.7457			598.332	21.4563			583.824	17.134	9.25434			586.755	21.1593			586.755	11.3256			586.755	44.8654			576.522
594.879	16.468	100		595.287	41.2002			595.287	17.3488							499.456	64.7025			497.43	24.7917			584.737	11.2212			600.037	32.4032			585.487	16.8384	29.6005			588.427	17.3996			588.427	10.6511			588.427	36.2607			578.165
596.57	17.0717			596.979	46.9985			596.979	13.0036							500.868	65.5918			498.843	23.8327			586.398	16.223			601.741	20.6283			587.15	21.1422	5.37331			590.099	31.5555			590.099	11.6809			590.099	44.1783			579.81
598.26	13.7623			598.668	48.6289			598.668	8.05305							502.285	60.3466			500.257	19.8809			588.059	9.6136			603.446	33.843			588.814	34.6773	18.5288	100		591.77	32.1278			591.77	7.479			591.77	31.3377			581.454
599.95	21.0863			600.36	56.9894			600.36	12.9524							503.713	63.6505			501.67	26.1691			589.72	11.1392			605.15	40.6448			590.477	17.7358	28.5309	0		593.442	16.6849			593.442	9.26539			593.442	38.0487			583.09
601.64	23.2938			602.051	41.2645	0		602.051	7.05001							505.125	61.6487			503.083	24.8061			591.381	9.48818			606.854	33.1892			592.14	26.5287	30.8007			595.113	36.613			595.113	9.01934			595.113	39.3794			584.734
603.33	0			603.742	69.1456	100		603.742	12.5671							506.545	57.8774			504.496	26.8288			593.043	10.6737			608.56	19.745			593.803	30.8303	29.6209			596.785	23.5024			596.785	7.09458			596.785	39.2929			586.378
605.02	29.0317			605.433	61.9644			605.433	15.5734							507.96	58.3209			505.909	26.9718			594.704	13.7643			610.265	27.5625			595.467	50.4641	41.8623			598.457	29.3655			598.457	12.3712			598.457	40.6694			588.022
606.711	17.3257			607.124	58.1464			607.124	6.49128							509.381	56.9779			507.322	22.13			596.365	12.9621			611.969	25.6986			597.13	39.5719	100	100		600.128	23.1375			600.128	9.43872			600.128	48.4761			589.666
608.401	20.5125			608.814	56.8051			608.814	13.7887							510.801	54.2546			508.735	25.7582			598.026	14.1905			613.674	8.297			598.793	47.625	59.4973	0		601.8	21.0556			601.8	14.0988			601.8	38.7233			591.31
610.091	33.1771			610.506	54.8031			610.506	13.4724							512.217	61.1153			510.15	30.694			599.687	9.65568			615.378	27.2356			600.457	52.9149	38.5611			603.472	17.3284			603.472	16.9465			603.472	30.8922			592.946
611.781	26.5488			612.197	44.4125			612.197	10.3875							513.649	54.1937			511.562	36.2765			601.349	16.9789			617.083	9.83404			602.12	54.5698	40.5909			605.143	22.6689			605.143	15.3807			605.143	37.3401			594.59
613.471	28.0677			613.888	53.9591			613.888	9.51902							515.057	50.9716			512.975	35.0858	0		603.01	13.9376			618.788	26.3523			603.783	71.1051	60.9809			606.815	22.3795			606.815	17.0673			606.815	32.8227			596.234
615.162	40.3829			615.579	38.5214			615.579	16.4168							516.476	53.3345			514.388	43.899	100		604.671	15.2867			620.492	25.7959			605.447	41.1251	49.5413			608.487	29.5622			608.487	15.1287			608.487	26.5013			597.878
616.852	21.8799			617.27	43.8248			617.27	16.5993							517.892	45.4248			515.801	31.0966			606.332	14.9101			622.197	32.4801			607.11	47.5497	32.6963			610.158	15.186			610.158	19.5739			610.158	48.392			599.522
618.542	17.8816			618.961	47.5626	0		618.961	25.487	0						519.313	50.5831			517.214	38.006			607.993	14.6159			623.902	18.8617			608.773	29.6011	41.0707			611.83	22.63			611.83	13.0534			611.83	34.831			601.158
620.232	26.0077	0		620.652	40.5998	100		620.652	31.1784	100						520.733	51.4145			518.627	27.4467			609.654	6.44137			625.605	13.3673			610.436	23.5928	22.4285			613.502	22.6925	100		613.502	11.4562			613.502	44.1783			602.802
621.922	27.4638	100		622.343	43.0745			622.343	22.6355							522.149	45.7223			520.042	28.9935			611.317	9.86788			627.311	18.7644			612.1	38.8491	23.7135			615.174	15.5899	0		615.174	12.0814			615.174	37.3957			604.446
623.613	44.3662			624.034	48.1739			624.034	14.4871							523.581	38.8021			521.454	28.6933	0		612.977	11.264			629.016	51.6687			613.763	37.8958	69.7688			616.845	25.5951			616.845	11.7008			616.845	35.026			606.09
625.303	56.8122			625.725	56.7159			625.725	15.3204							524.989	52.0156			522.867	20.9073	100		614.638	11.7271			630.72	48.0382	100		615.426	26.395	93.5992			618.517	30.5338			618.517	14.5611			618.517	27.6648			607.734
626.993	62.7149			627.417	56.6484			627.417	21.5936							526.409	42.7858			524.28	27.6325			616.299	16.3505			632.425	29.0995	0		617.091	47.524	54.0005			620.188	36.2696			620.188	15.8459			620.188	43.6306			609.378
628.683	86.5254			629.108	44.3627			629.108	24.6508							527.836	40.4073			525.693	21.269			617.96	11.2225			634.129	4.11003			618.753	50.5181	26.8994			621.86	16.7776			621.86	13.8323			621.86	35.6355			611.014
630.373	62.8918			630.799	38.481			630.799	15.3844							529.245	41.7049			527.106	34.2493			619.621	14.1011			635.834	25.469			620.416	40.9523	35.56			623.532	37.1356			623.532	12.4559			623.532	38.5593			612.658
632.063	91.767			632.49	42.2785			632.49	16.1441							530.665	38.1977	0		528.52	32.0539			621.284	16.6429			637.539	35.9364			622.08	32.3904	9.54236			625.204	29.3483			625.204	14.6635			625.204	40.8925			614.301
633.754	94.2213	0		634.181	42.9168			634.181	13.5946							532.081	38.2105	100		529.934	32.0457			622.944	24.6924			639.243	25.2394			623.743	31.4971	10.8496			626.875	27.4824			626.875	18.6833			626.875	44.2027			615.946
635.444	63.4623	100		635.872	33.3648			635.872	20.9262							533.5	37.1577			531.346	43.1177	0		624.605	17.1488			640.948	48.9215			625.407	32.7398	10.9361			628.547	32.9936			628.547	18.1939			628.547	42.1457			617.59
637.134	63.9025			637.563	26.9489			637.563	13.1411							534.92	35.0419			532.759	53.9643	100		626.266	14.4012			642.653	47.9409			627.071	31.7324	22.1061			630.218	34.2527			630.218	22.982	100		630.218	40.3761	100		619.226
638.824	49.7858			639.254	28.291			639.254	15.7585							536.34	35.2924			534.172	65.6889			627.927	18.6328			644.356	28.3485			628.733	35.0026	20.6158			631.89	27.3983			631.89	24.7117	0		631.89	43.1764	0		620.87
640.514	55.0902			640.945	44.1377			640.945	13.3682							537.769	36.2771			535.585	66.1624			629.589	28.3258			646.062	36.6875			630.396	11.924	13.4457			633.563	40.5197			633.563	20.0871			633.563	39.8006			622.514
642.205	63.6396	0		642.636	46.3268			642.636	14.489							539.177	34.4556			536.998	81.0541			631.251	20.9222			647.767	10.8916			632.059	18.305	22.3113			635.234	25.9815			635.234	18.9234			635.234	28.8773			624.158
643.895	66.8437	100		644.327	52.9858			644.327	6.85458							540.597	28.7253			538.412	76.0289			632.911	27.3577			649.471	40.7771			633.723	15.8542	18.0318			636.905	28.6293			636.905	15.1386			636.905	20.4898			625.802
645.585	51.9534			646.019	42.282			646.019	15.6797							542.017	33.8986			539.826	84.5846			634.572	19.8998			651.176	59.6604			635.387	23.2862	59.616			638.577	23.8998			638.577	17.9799			638.577	11.4456			627.446
647.274	54.8966			647.709	36.2616			647.709	9.04834							543.432	30.449			541.238	64.3724			636.233	15.2491			652.881	91.125			637.05	26.4618	33.3932	100		640.248	25.2409			640.248	17.6217			640.248	42.5137			629.082
648.964	64.4471			649.4	34.2634			649.4	13.7118							544.852	36.1931			542.651	56.6289			637.894	20.9607			654.585	69.766			638.713	6.4788	36.8913	0		641.921	10.5386			641.921	21.09			641.921	33.7694	100		630.726
650.655	64.3064			651.091	41.9436			651.091	11.5938							546.273	27.7911			544.064	51.0523			639.556	22.3572			656.29	90.8954			640.376	14.78	21.0125			643.592	14.7239			643.592	18.4859			643.592	28.0794	0		632.37
652.345	53.0174			652.782	34.9004			652.782	15.7312							547.701	27.7116			545.477	46.7251			641.218	21.8939			657.995	69.2649			642.039	23.1893	38.5935			645.264	17.2137			645.264	19.8142			645.264	26.1732			634.014
654.035	57.7469			654.473	35.855			654.473	18.8425							549.109	29.3124			546.891	55.5478			642.879	18.9661			659.699	67.2687	100		643.703	14.5989	72.9512			646.935	22.4832	100		646.935	22.3505			646.935	17.2649			635.658
655.725	40.5592			656.165	36.0484	0		656.165	20.4303							550.528	27.8164			548.304	51.9183	0		644.539	17.5739	100		661.404	55.2439	0		645.367	23.2324	30.8974			648.606	12.3311	0		648.606	20.1329			648.606	38.0362			637.294
657.415	36.7331	0		657.855	42.2537	100		657.855	21.6969							551.949	21.0875			549.718	59.7158	100		646.2	16.6016	0		663.109	61.9485			647.03	14.2362	20.9295	100		650.278	21.3775			650.278	23.0577			650.278	60.6206			638.938
659.105	46.3926	100		659.546	34.3592			659.546	22.7859							553.364	31.1249			551.13	50.5871			647.861	11.7781	100		664.813	56.5094			648.692	15.988	29.0086	0		651.951	18.7343			651.951	22.8434			651.951	43.1101			640.582
660.796	24.0127			661.237	30.534			661.237	14.8248							554.785	26.3015			552.543	45.5778			649.523	11.8598	0		666.518	47.8086			650.356	20.2314	22.0315			653.622	22.3708			653.622	25.6628			653.622	66.0357			642.225
662.486	39.7575			662.928	33.245			662.928	11.9977							556.204	37.7893			553.956	41.568			651.185	22.0654			668.222	38.1272			652.019	22.4709	47.8663			655.294	31.2768			655.294	26.5423			655.294	56.1278			643.87
664.176	22.1072			664.62	30.9704			664.62	13.4575							557.625	28.4898			555.369	32.3918			652.846	17.7867			669.927	31.4226			653.683	27.4885	42.4828			656.965	28.9402			656.965	24.2955			656.965	58.7301			645.514
665.867	29.7992			666.311	26.7084			666.311	17.5288							559.041	26.9415			556.783	39.4985			654.506	18.4224			671.632	26.2551			655.347	46.6909	49.0462			658.636	34.0195			658.636	19.7628			658.636	61.9609			647.15
667.556	30.2296			668.001	31.4074			668.001	5.25157							560.461	27.7553			558.196	31.9063			656.167	15.3756			673.337	26.9088			657.01	50.5719	57.01			660.309	21.5782			660.309	20.0405			660.309	42.7552			648.794
669.247	18.5605			669.692	29.5726	0		669.692	8.76382							561.888	28.4735			559.61	23.0897			657.828	20.6663			675.041	29.5587			658.672	82.0387	36.9843			661.981	47.0156			661.981	21.5491			661.981	37.6748			650.438
670.937	23.6697			671.383	21.4829	100		671.383	12.8963							563.297	33.9109			561.022	25.2575			659.49	29.3955	100		676.746	17.5542			660.336	78.7898	13.047			663.652	30.9506	100		663.652	17.3632			663.652	58.1824			652.082
672.627	23.7993			673.075	31.3245			673.075	10.3289							564.717	36.1427			562.435	27.707			661.152	44.1869	0		678.45	27.5625			661.999	62.7583	23.0166			665.324	34.6284	0		665.324	13.6617	100		665.324	73.3875			653.726
674.317	13.1844			674.766	39.4543			674.766	11.0954							566.137	32.8524			563.848	22.6811			662.813	43.79			680.155	20.0719			663.663	70.115	30.2192			666.995	32.281			666.995	15.965	0		666.995	40.5866			655.362
676.007	15.9479			676.457	43.7137			676.457	13.7482							567.556	26.53	0		565.262	25.1669			664.473	68.028			681.86	27.4652			665.326	48.2206	20.7464			668.666	31.1148			668.666	16.2111			668.666	35.5181			657.006
677.697	21.607			678.147	33.3804			678.147	13.7656							568.972	35.3529	100		566.675	15.2898			666.134	100			683.565	12.757			666.99	45.9852	22.6504			670.339	43.4459			670.339	16.6918			670.339	23.89			658.65
679.388	21.0249			679.838	46.9536			679.838	14.2875							570.392	29.9867			568.088	21.2202			667.796	70.3337			685.269	24.9126			668.652	43.1182	41.8945			672.011	28.3679			672.011	14.1285			672.011	18.7721			660.294
681.078	13.3268			681.53	40.2593			681.53	17.4892							571.82	30.1518			569.502	16.0024			669.457	38.9578			686.973	40.7771			670.315	38.5904	30.233			673.682	47.6678			673.682	11.5471			673.682	54.5095			661.938
682.768	18.0618			683.221	48.5376			683.221	14.0269							573.229	37.0256			570.914	22.1201			671.119	42.695			688.678	10.3905			671.98	34.1566	34.1968			675.354	36.8742			675.354	11.7209			675.354	45.9086			663.574
684.458	25.0773			684.912	43.9705			684.912	17.2529							574.649	31.0746			572.327	18.9023			672.78	48.8672			690.383	21.6089			673.643	42.5747	25.2361			677.025	24.4655			677.025	16.6782			677.025	54.7047			665.218
686.148	24.4327			686.603	44.3395			686.603	12.6811							576.069	30.4058			573.741	15.0212			674.44	29.5587			692.088	26.9088			675.306	26.4618	30.0072			678.696	50.009			678.696	16.1598	100		678.696	29.7662			666.862
687.839	21.695			688.293	52.4988			688.293	20.2862							577.489	30.0062			575.154	19.1863			676.102	16.0113			693.793	29.7883			676.97	27.7907	25.6209			680.369	37.6755			680.369	20.0085	0		680.369	48.3868			668.506
689.529	25.1687			689.984	52.1997			689.984	14.4481							578.909	29.7259			576.567	16.3672			677.763	10.5481			695.497	14.021			678.632	19.7785	31.6267			682.041	40.3168			682.041	24.3697			682.041	45.2865			670.15
691.219	12.3968			691.676	50.5086			691.676	18.5104							580.324	37.9378			577.98	13.0969			679.425	12.9581			697.201	38.6837			680.295	25.3744	23.0285	100		683.712	37.8547			683.712	23.4264			683.712	37.9278			671.794
692.909	25.7883			693.367	47.9327			693.367	11.6619							581.745	37.0341			579.394	13.3832			681.086	13.7598			698.906	32.7301			681.959	29.0872	39.0766	0		685.384	20.4725			685.384	26.285			685.384	22.609			673.43
694.599	19.7786			695.058	42.2257			695.058	16.5781							583.165	38.8636			580.806	4.51975	0		682.747	14.7792			700.612	21.5116			683.623	21.541	17.3248			687.054	19.5461			687.054	26.2828			687.054	34.1349			675.074
696.29	21.1899			696.749	52.646	0		696.749	19.974							584.581	40.4194			582.219	18.5583	100		684.407	16.0132			702.316	26.9088			685.286	21.3967	17.9472			688.726	25.2732			688.726	24.8606			688.726	30.267			676.718
697.98	13.3011	0		698.439	48.4146	100		698.439	10.5697							586.009	45.1512			583.633	14.1256			686.069	10.1658			704.02	13.1377			686.949	13.9277	20.3276			690.399	12.6054			690.399	24.3818			690.399	17.513			678.362
699.67	12.534	100		700.131	54.8462			700.131	17.4516							587.42	46.2081			585.046	6.15029			687.73	12.6647			705.724	28.4458			688.612	32.5175	17.0348			692.07	21.6172			692.07	23.4481			692.07	18.6237			680.006
701.36	18.2348			701.822	54.8154			701.822	12.983							588.84	39.8806			586.459	12.7375			689.392	10.6322			707.429	24.683			690.276	30.7052	31.796			693.742	15.2032			693.742	22.7112			693.742	31.0097			681.642
703.05	26.161			703.513	73.6646			703.513	12.8277							590.257	41.065			587.872	10.3449			691.053	10.2965			709.134	13.5618			691.939	55.778	46.966			695.414	18.7968			695.414	23.3029			695.414	11.2756			683.286
704.739	5.55014			705.204	63.6501			705.204	12.6851							591.677	41.8569			589.286	15.1843			692.714	9.06225			710.839	15.558			693.603	54.8415	37.8642			697.084	17.3392			697.084	20.5066			697.084	10.7836			684.93
706.43	16.3873			706.895	67.356			706.895	18.3345							593.096	51.416			590.699	21.2258			694.374	7.45283			712.544	33.1892			695.266	70.8742	39.8904			698.757	19.0992			698.757	24.4322			698.757	13.3517			686.574
708.12	17.2852			708.585	51.4058			708.585	14.4577							594.512	38.8467			592.112	17.1346			696.036	11.2223			714.248	22.8191			696.929	75.0509	36.0857			700.429	24.0963			700.429	23.3898			700.429	25.5546			688.218
709.81	9.21981			710.277	48.7968			710.277	21.3933							595.941	43.3312			593.525	27.8375			697.697	14.6114			715.952	26.6254			698.592	70.672	51.0401			702.1	13.5469			702.1	18.8354			702.1	10.6595			689.862
711.5	18.3388			711.968	44.0364			711.968	12.5473							597.353	48.0878			594.938	21.2008			699.359	7.62371			717.657	44.9641	100		700.256	72.6264	34.7767			703.772	21.8569			703.772	18.4957			703.772	24.1006			691.498
713.19	20.6752			713.659	48.4348			713.659	23.1278							598.772	43.9565			596.351	17.9524			701.02	10.0388			719.363	39.8938	0		701.919	53.3917	24.1			705.444	14.8276			705.444	18.6413			705.444	10.1365			693.142
714.881	15.6721			715.35	60.4075			715.35	22.0594							600.188	54.8125			597.764	16.7514			702.681	12.7478			721.067	40.626			703.582	39.5331	36.8876			707.115	0			707.115	21.0483			707.115	14.6758			694.786
716.571	11.0545			717.041	36.6153			717.041	13.9133							601.609	51.1266			599.177	14.0468	0		704.342	11.9866			722.772	49.5752			705.246	56.3729	6.56164			708.787	14.0048			708.787	19.4829			708.787	23.5154			696.43
718.261	22.2421			718.732	45.7532			718.732	13.8729							603.029	54.3165	0		600.591	15.026	100		706.003	13.8056			724.475	2.99713			706.909	38.4567	28.6239			710.459	5.1333			710.459	16.6889			710.459	19.0226			698.074
719.951	25.0029			720.423	49.9472			720.423	10.6618							604.449	44.5654	100		602.004	20.7677			707.664	14.2289			726.18	20.0719			708.571	30.645	12.7384			712.13	10.9037			712.13	17.323			712.13	13.2152			699.71
721.641	20.9736			722.114	55.6725			722.114	12.3321							605.876	55.8923			603.417	22.316			709.326	13.3402			727.885	28.4458			710.236	24.106	0.774882			713.802	9.44383			713.802	17.9641			713.802	7.52521			701.354
723.331	13.1788			723.805	50.8718			723.805	12.7865							607.284	55.1578			604.83	20.6316			710.987	11.1796			729.59	29.656			711.899	33.0356	31.8321			715.474	21.0774			715.474	16.7204			715.474	20.0443			702.998
725.022	21.8182			725.496	49.4358	0		725.496	7.99021							608.704	58.832			606.243	17.5632			712.648	15.2901			731.295	27.2356			713.562	15.8606	0			717.145	14.4842			717.145	18.7155			717.145	19.4126			704.642
726.712	18.758	0		727.188	52.8043	100		727.188	11.0081							610.133	64.8272			607.656	11.0283			714.309	6.69189			733	23.2783			715.226	13.9277	35.677			718.817	15.4107			718.817	12.7119			718.817	19.5922			706.286
728.402	6.61238	100		728.878	52.5686			728.878	11.9461							611.541	60.7929			609.069	5.56275			715.97	13.6804			734.703	29.0995			716.889	13.7724	18.2472			720.489	23.0251			720.489	17.2353			720.489	22.077			707.93
730.092	24.028			730.569	42.3815			730.569	6.96734							612.961	64.8764			610.484	11.527			717.631	9.95359			736.408	18.208			718.552	11.8998	16.7347			722.16	15.1817			722.16	15.5544			722.16	27.5098			709.566
731.782	18.7161			732.26	51.2309			732.26	15.9497							614.377	71.5473			611.896	12.378			719.293	9.10802			738.114	26.9088			720.215	7.6562	30.3175			723.832	15.4754			723.832	17.7885			723.832	24.3355			711.21
733.473	18.9778			733.951	37.0574			733.951	10.1191							615.797	72.5489			613.309	16.0083			720.954	13.4253			739.818	32.6328			721.879	26.4143	26.5212			725.504	14.59			725.504	15.5946			725.504	26.4923			712.854
735.163	14.7736			735.642	56.0973			735.642	10.4738							617.217	65.9428			614.722	14.5443			722.615	12.1535	100		741.523	22.3949			723.542	25.4886	28.5152			727.175	17.4104			727.175	11.2505			727.175	10.2449	100		714.498
736.853	14.2146			737.334	59.7066			737.334	17.2402							618.636	70.6419			616.135	11.1704			724.276	10.1213	0		743.228	33.6134			725.205	25.012	28.2066			728.847	28.8257			728.847	20.7119	100		728.847	17.6461	0		716.142
738.543	9.92457			739.024	75.7641			739.024	9.77594							620.065	74.1236			617.548	15.0855			725.937	8.04757			744.931	23.8347			726.869	14.4971	42.2015			730.519	15.5466			730.519	20.4561	0		730.519	26.9778			717.778
740.233	20.1111			740.715	74.6			740.715	13.4934							621.473	66.7204			618.962	16.4016			727.598	12.1125			746.636	36.3606			728.532	22.0479	43.7937			732.19	28.0526			732.19	20.8146			732.19	33.7694			719.422
741.924	21.7376			742.406	62.107			742.406	8.42679							622.893	64.6727			620.376	10.6554			729.26	14.4411			748.341	29.0995			730.195	28.5695	36.1925			733.862	13.6743			733.862	19.5651			733.862	21.4984			721.066
743.614	25.3758			744.097	65.0429			744.097	20.7358							624.313	72.4134			621.788	15.7603			730.921	9.57051			750.046	33.843			731.859	13.699	29.8987			735.534	14.3093			735.534	24.3161			735.534	21.4334			722.71
745.304	42.6998			745.789	69.3286			745.789	13.8159							625.728	70.6851			623.201	18.1835			732.583	12.198			751.751	34.2133			733.522	24.8308	45.2516	100		737.205	12.2663			737.205	25.4869			737.205	14.4808			724.354
746.994	20.8613			747.479	64.9264	0		747.479	14.6241							627.149	68.0265			624.614	19.4119			734.243	13.3962			753.455	25.469			735.185	9.50306	7.46196	0		738.877	20.2113			738.877	25.6254			738.877	14.4587			725.998
748.684	15.2453			749.17	40.8375	100		749.17	13.6375							628.569	72.0668			626.027	18.213			735.904	13.7212			755.159	29.3291	100		736.849	17.0494	8.25546			740.548	13.2468			740.548	26.055			740.548	37.1542			727.634
750.374	22.6153			750.861	55.1259			750.861	18.8144							629.997	75.9765			627.44	23.9974			737.566	24.5638			756.865	30.8662	0		738.512	26.8782	31.5925			742.22	15.5359	100		742.22	29.1908			742.22	32.9558			729.277
752.065	16.749			752.552	47.0315			752.552	17.3141							631.405	67.7737			628.854	18.8252			739.227	32.4797			758.569	50.73			740.175	28.9664	49.838			743.892	10.3811	0		743.892	34.3835			743.892	28.5715			730.922
753.755	6.18343			754.243	46.64			754.243	17.5569							632.825	66.7457			630.268	31.8234			740.889	19.8194			760.274	74.662			741.838	21.6858	32.0014			745.564	11.3183			745.564	37.8588	100		745.564	25.5237			732.566
755.445	11.3779			755.935	55.1068			755.935	10.5126							634.253	65.1427			631.68	31.9786	0		742.55	17.8242			761.979	69.2649			743.502	27.3552	6.74476			747.235	2.33234			747.235	40.0227	0		747.235	30.3936			734.21
757.135	35.521	0		757.625	31.909			757.625	18.9635							635.661	61.0751			633.093	33.088	100		744.21	18.8096			763.683	62.1011			745.165	29.5747	15.7719	100		748.907	21.492			748.907	50.471			748.907	27.9219	100		735.846
758.825	18.3602	100		759.316	59.7494			759.316	11.4363							637.081	59.2224			634.506	30.9181			745.871	18.5524			765.387	64.0973			746.829	40.4671	9.05913	0		750.578	19.5245			750.578	57.7431			750.578	13.6207	0		737.49
760.516	18.1808			761.007	34.921			761.007	17.4979	0						638.5	52.8392			635.92	39.0702			747.533	33.3321	100		767.092	73.125			748.492	50.1751	2.88407			752.25	14.8383			752.25	67.4989			752.25	27.5164			739.134
762.206	27.3423			762.698	41.6157			762.698	19.9521	100						639.92	55.7811			637.333	37.4007			749.194	18.774	0		768.797	56.6067			750.155	48.4426	51.3504			753.923	19.1489			753.923	71.2795			753.923	17.9342			740.778
763.895	19.9092			764.39	34.6858			764.39	50.9639							641.336	55.8531			638.746	41.6631			750.856	18.0837			770.502	49.9994			751.818	61.2937	23.627			755.594	29.3548			755.594	67.3323			755.594	22.6865			742.422
765.585	12.9945			766.081	37.0123			766.081	69.208							642.756	50.6155			640.16	48.3959			752.517	16.3878			772.206	41.5282			753.481	68.9738	33.4033			757.265	17.4211			757.265	79.6666			757.265	40.0998			744.066
767.275	26.8945			767.771	28.264			767.771	43.6656							644.184	46.6749			641.572	52.0295			754.177	11.5191			773.911	34.1698			755.145	78.1252	37.0809			758.937	21.8894			758.937	91.8799			758.937	31.4087			745.702
768.966	34.0675			769.462	25.204			769.462	42.7314							645.593	53.8799			642.985	50.8559			755.838	6.22941			775.616	20.0719			756.809	88.7048	17.0368			760.608	18.5786			760.608	100			760.608	87.4174			747.346
770.656	0.0169021			771.153	19.1955			771.153	51.89							647.013	47.8413			644.398	65.7044	0		757.5	12.1954			777.32	31.8468			758.471	81.5035	18.4184			762.281	9.62306			762.281	98.7253			762.281	82.5426			748.99
772.346	19.8075			772.845	17.9891			772.845	19.4487							648.433	46.5076			645.812	73.0716	100		759.161	39.1384			779.025	42.9679			760.135	58.0772	36.8876			763.953	6.75944			763.953	94.4251			763.953	61.4032			750.634
774.036	20.6314			774.536	24.3772			774.536	19.0436							649.852	47.3837			647.225	80.4386			760.823	67.064			780.73	24.2588			761.798	42.8341	24.6259			765.624	11.4868			765.624	84.7155			765.624	38.8939			752.278
775.726	11.3711			776.227	29.5449			776.227	18.7962							651.269	43.0031			648.638	81.3138			762.484	94.1011			782.434	52.8789			763.461	38.7997	45.6605			767.295	20.0041			767.295	81.9337			767.295	28.8995			753.914
777.416	17.9681			777.917	24.5427			777.917	14.0683							652.688	37.107			650.052	81.9485			764.144	75.1532			784.139	12.0248			765.125	23.7092	43.3543			768.967	19.9544			768.967	84.1812			768.967	26.4923			755.558
779.107	21.2823			779.608	20.3657			779.608	11.2069							654.117	42.3867			651.464	73.8909			765.805	49.4378			785.843	33.2312			766.789	19.5411	23.2964			770.638	21.6497			770.638	92.418			770.638	25.1957			757.202
780.797	27.271			781.3	19.8111			781.3	13.6483							655.525	37.1694			652.877	74.3302			767.467	37.4317			787.548	27.6598			768.451	15.8542	39.5699			772.31	20.5179			772.31	82.2621			772.31	10.3315			758.846
782.487	24.1928			782.991	30.3038			782.991	10.8083							656.945	43.7377			654.29	76.33	0		769.129	55.9543			789.253	45.6178			770.115	24.2464	29.5884			773.983	11.558			773.983	68.5608			773.983	23.8591			760.49
784.177	25.2279	0		784.682	25.6962			784.682	15.8403							658.373	42.7197			655.704	88.1907	100		770.79	30.4861			790.957	44.1781			771.778	25.0425	55.135			775.654	11.8732			775.654	61.7806			775.654	22.0614			762.126
785.867	39.1807	100		786.373	30.5048			786.373	11.5657							659.785	38.5863			657.117	83.6702			772.451	17.1488			792.662	41.2782			773.441	30.2953	36.0839			777.325	13.0286			777.325	47.8371			777.325	23.4445			763.77
787.558	25.907			788.063	26.3801			788.063	13.3229							661.2	41.3674			658.53	94.0367			774.111	14.3199			794.367	36.5902			775.105	15.3711	22.6097			778.996	19.6498			778.996	34.7324			778.996	34.3233			765.414
789.248	24.4535			789.754	30.7034			789.754	7.98856							662.62	47.162			659.944	76.714	0		775.772	17.0254			796.071	37.4735			776.769	16.6267	20.1122			780.668	16.7064			780.668	35.9042			780.668	21.9839			767.058
790.938	30.0795			791.446	29.6666			791.446	8.26155							664.04	43.2116			661.356	82.2831	100		777.434	13.5077			797.776	27.0061			778.431	22.0953	28.1305			782.341	26.8972			782.341	30.5488			782.341	22.9746			768.702
792.628	19.6103			793.137	27.5249			793.137	21.2046							665.461	43.121			662.769	71.5013			779.096	13.0076			799.481	40.5476			780.094	22.5614	24.507			784.012	14.0803			784.012	24.5294			784.012	15.5759			770.346
794.318	19.5551			794.828	19.6925			794.828	17.1279							666.877	41.0223			664.183	59.7575			780.757	9.1498			801.185	37.5708			781.758	21.9572	60.8045			785.684	13.5902			785.684	18.1702			785.684	20.3502			771.982
796.008	31.9387			796.519	13.7655			796.519	18.5772							668.305	48.3116			665.596	67.2139			782.418	9.02016			802.891	37.1466			783.421	23.8772	46.2588	100		787.355	17.8078			787.355	17.1196			787.355	24.3112			773.626
797.699	19.0538			798.209	12.217			798.209	10.2236							669.716	46.2273			667.009	62.333			784.078	7.32688			804.595	32.2506			785.085	13.2505	36.7185	0		789.026	14.6419			789.026	15.4544			789.026	23.491			775.27
799.389	22.703			799.901	18.0177			799.901	12.9314							671.132	40.948			668.422	59.7455			785.739	10.7598			806.299	34.4967			786.749	25.1457	16.6483			790.699	14.8599			790.699	12.9818			790.699	40.5763	100		776.914
801.079	20.265			801.592	26.4902			801.592	13.8742							672.553	44.2315			669.836	69.1981	0		787.401	8.98284			808.004	27.0061			788.411	23.159	4.26934			792.371	13.7866			792.371	11.227			792.371	27.7823	0		778.558
802.769	30.9335			803.283	15.6036			803.283	6.01083							673.973	45.0042			671.248	70.302	100		789.063	6.18548			809.708	47.1549			790.074	37.9019	34.6038			794.042	13.0783			794.042	9.83554			794.042	32.2622			780.194
804.459	35.4529	0		804.974	17.4618	0		804.974	4.75893							675.389	45.2332			672.661	67.3382			790.724	7.92085			811.413	43.3717			791.737	51.6139	17.4112			795.714	16.3307			795.714	10.3778			795.714	34.463			781.838
806.15	39.4149	100		806.665	23.9205	100		806.665	16.6274							676.809	44.2444			674.075	66.148			792.385	10.1692			813.119	31.193			793.402	58.1379	41.7554			797.385	16.7561			797.385	8.77071			797.385	33.8712			783.482
807.84	27.3975			808.356	21.6851			808.356	9.54291							678.237	46.1663			675.488	77.9171			794.045	6.65219			814.822	53.1085			795.065	51.2789	30.3921			799.056	8.98597			799.056	9.50944			799.056	32.5437			785.126
809.53	38.447			810.047	26.9979			810.047	7.29982							679.648	45.8456			676.901	71.9829	0		795.707	9.06302			816.527	37.1466			796.728	65.2353	27.2978			800.729	10.9749			800.729	5.5987			800.729	18.1285			786.77
811.22	29.3982			811.738	20.0616			811.738	11.4434							681.065	48.1768			678.314	75.9382	100		797.369	10.969			818.232	51.1123			798.391	68.0224	24.1967			802.401	7.7701			802.401	7.02202			802.401	46.0223			788.414
812.91	44.2457			813.429	25.5029			813.429	11.8858							682.497	50.856			679.728	79.1773			799.03	13.8468			819.936	33.6134			800.054	55.2212	16.3602			804.072	8.04873			804.072	6.27731			804.072	36.5471			790.05
814.601	23.6505			815.12	23.2229			815.12	4.89597							683.904	43.5166			681.141	74.8282			800.691	25.7525			821.642	51.3419	100		801.718	54.0625	21.333			805.744	10.6188			805.744	5.81851			805.744	23.293	100		791.694
816.291	24.9468			816.811	27.68			816.811	24.4777							685.325	48.8592			682.554	66.1345			802.352	42.9429			823.347	18.3053	0		803.382	55.7477	33.973			807.415	3.37329			807.415	6.76962			807.415	31.2756	0		793.338
817.981	27.8707			818.502	30.3584	0		818.502	7.4411							686.741	46.05	0		683.967	64.4511			804.012	70.9455	100		825.05	27.3329			805.045	44.5599	9.16787			809.087	11.6725			809.087	8.72979			809.087	15.6534			794.982
819.671	28.7627			820.193	38.3924	100		820.193	17.4859							688.16	46.2994	100		685.38	68.0677			805.674	52.2922	0		826.755	37.5708			806.708	51.9725	28.1034			810.759	17.5248			810.759	9.87609			810.759	37.1827			796.626
821.361	19.6628			821.884	25.6126			821.884	6.4491							689.581	53.6725			686.793	75.5423			807.336	45.4066			828.459	55.5288			808.37	48.7923	24.8071			812.431	17.5788			812.431	9.81779			812.431	59.4171			798.262
823.05	12.2796			823.575	39.3935			823.575	11.9403							690.997	45.0922			688.206	68.2986			808.997	35.7792			830.164	44.1781			810.034	41.4144	26.0838			814.102	32.9073			814.102	2.37779			814.102	76.8419			799.906
824.741	32.5406			825.266	40.0576			825.266	7.8751							692.429	41.8194			689.62	59.7808			810.658	14.399			831.87	49.5752			811.698	23.5818	23.3184			815.774	14.8536			815.774	9.6427			815.774	82.3035			801.55
826.431	15.9813			826.958	49.7477			826.958	16.7463	0						693.837	52.3756			691.033	61.1926			812.319	15.8349			833.574	63.3463			813.361	31.773	17.9352			817.445	22.7834			817.445	8.69123			817.445	57.8234			803.194
828.121	24.5473			828.648	37.8482			828.648	13.2571	100						695.257	52.6657			692.446	57.7163			813.979	12.025			835.278	30.6366			815.025	26.8547	65.3199			819.117	18.1727			819.117	6.01217			819.117	49.4078			804.838
829.811	24.476			830.339	45.7294			830.339	17.7609							696.676	48.6723			693.859	67.9812			815.641	9.9155			836.983	58.0465			816.688	27.8448	24.0136			820.789	21.0989			820.789	2.37706			820.789	34.2573			806.481
831.501	39.9508			832.03	46.5443			832.03	7.75364							698.092	43.9792			695.272	72.3488			817.303	9.06117			838.687	35.4773			818.35	24.6022	23.9169			822.46	13.0891			822.46	5.08862			822.46	24.0112			808.118
833.192	22.1293			833.721	50.5204			833.721	9.9085							699.513	44.9125			696.685	71.7915	0		818.964	11.6009			840.393	35.7069			820.015	25.012	29.5986			824.132	26.0637			824.132	6.08421e-14			824.132	17.9585			809.761
834.882	28.932			835.412	29.3605			835.412	9.50084							700.928	41.3135			698.098	77.6839	100		820.625	11.4337			842.098	49.4226			821.678	21.7459	28.3357			825.804	11.8302			825.804	4.80094			825.804	19.3882			811.406
836.572	17.96			837.105	33.2461			837.105	14.3263							702.36	42.2169			699.513	74.7748			822.286	11.1349			843.802	45.9447			823.341	16.633	50.9316			827.475	11.5472			827.475	5.66765			827.475	15.9415			813.05
838.262	28.8623			838.795	33.7862			838.795	12.0158							703.768	43.7389			700.925	89.1906			823.946	11.8154			845.506	65.9612			825.005	28.9793	19.339			829.147	15.4322			829.147	3.69212			829.147	32.3862			814.694
839.952	33.1725			840.486	33.9699	0		840.486	9.16928							705.188	47.4302			702.338	96.1665			825.609	11.5601			847.211	58.2207			826.668	21.474	21.1211			830.819	20.5698			830.819	6.97874			830.819	32.1423			816.33
841.642	37.5789			842.177	39.4065	100		842.177	11.2613							706.609	44.7541			703.751	94.0159			827.27	12.9263			848.915	42.9329			828.33	7.05247	14.3339			832.49	20.315			832.49	3.49224			832.49	19.4813			817.974
843.333	18.8211			843.868	45.97			843.868	18.6145							708.024	44.8255			705.164	100	0		828.931	17.7052	100		850.621	45.4855			829.994	8.90545	38.2712			834.162	11.8732			834.162	1.08597			834.162	7.6583			819.618
845.023	12.9543			845.56	58.4348			845.56	12.6922							709.445	45.3274			706.577	89.2409	100		830.592	11.6903	0		852.325	37.9949			831.658	7.29406	24.507			835.834	11.1649			835.834	6.42365			835.834	13.6451			821.262
846.713	25.5635			847.251	56.1363			847.251	7.36008							710.861	43.075			707.99	83.1387			832.253	12.0707			854.029	53.9568			833.321	17.3451	15.8242			837.505	6.73991			837.505	2.79622			837.505	11.903			822.906
848.403	18.8407	0		848.941	68.0119			848.941	8.77773							712.28	42.8275			709.405	85.2529			833.913	10.8394			855.734	51.5364			834.984	21.6684	21.4093			839.177	8.23872			839.177	1.42195			839.177	25.8827			824.55
850.093	14.3987	100		850.632	71.0092			850.632	17.2406							713.7	41.583			710.817	83.292			835.576	11.0529			857.438	75.5453			836.648	16.8682	13.9389	100		840.849	9.22566			840.849	7.13645			840.849	15.7309			826.186
851.784	21.7616			852.323	59.3586			852.323	15.2319							715.12	48.9475			712.23	82.732			837.237	30.616			859.144	51.9606			838.311	18.1302	23.9204	0		842.52	16.227			842.52	3.737			842.52	8.6734			827.83
853.474	33.1898			854.015	55.1143			854.015	8.36612							716.548	44.6175			713.643	76.1523			838.898	31.2962			860.849	93.7952			839.974	27.5667	29.6107			844.192	7.19777			844.192	3.04706			844.192	24.1472			829.474
855.164	20.078			855.706	38.7822			855.706	13.5764							717.957	45.1165			715.056	69.5244			840.559	26.2127			862.553	55.5911			841.638	28.2673	45.0787			845.864	6.84362			845.864	3.12837			845.864	12.5813			831.118
856.854	20.7053			857.397	41.8152			857.397	12.85							719.377	46.0014			716.469	70.0419			842.22	20.833			864.257	81.3666			843.301	29.5229	54.5447			847.535	14.0156			847.535	4.29743			847.535	29.5491			832.762
858.544	27.96			859.087	43.6762			859.087	9.86057							720.796	39.8671			717.883	56.4144			843.881	10.6722			865.962	64.1392			844.964	43.1529	53.9242			849.207	13.9226			849.207	4.36462			849.207	13.7263			834.398
860.235	24.0394			860.778	47.0301			860.778	11.5116	0						722.213	39.2997			719.297	59.8878			845.543	16.3455			867.666	62.6576			846.627	41.9037	50.3534			850.879	24.9515			850.879	4.36166			850.879	20.9819			836.042
861.925	25.1788			862.469	45.1304			862.469	11.5244	100						723.632	34.533			720.71	50.6464			847.204	17.2021			869.372	48.6919			848.291	34.8473	43.4594			852.55	5.29102			852.55	4.79285			852.55	22.7175			837.686
863.615	41.9104			864.161	47.701			864.161	4.28773							725.052	40.2161			722.122	52.1943			848.865	18.1258			871.076	39.9911			849.954	65.4358	54.2327			854.222	6.8221			854.222	5.60729			854.222	6.56324			839.33
865.305	44.5689			865.852	41.5789			865.852	23.637							726.48	36.4677			723.535	50.0112			850.526	17.2342			872.781	35.4773			851.617	83.0411	29.3188			855.895	18.4621			855.895	5.7095			855.895	28.6889			840.974
866.995	48.1606			867.542	41.8333			867.542	69.3834	0						727.889	33.1913			724.948	50.0054			852.187	16.6044			874.485	49.0188			853.281	91.8822	17.4519			857.565	14.942			857.565	7.9138			857.565	12.2998			842.61
868.685	100			869.233	40.2066			869.233	52.5232	100						729.309	30.4224			726.362	42.2421			853.848	16.345			876.189	64.2715			854.944	64.1135	17.24			859.237	16.7668			859.237	8.01159			859.237	20.6807			844.254
870.376	96.8341			870.924	37.8042			870.924	18.2081							730.728	30.0739			727.775	41.6529			855.51	10.5452			877.895	69.2445			856.607	45.4529	6.2838			860.909	9.92321			860.909	3.38564			860.909	9.14329			845.898
872.066	77.1583	0		872.616	37.2607			872.616	11.9539							732.144	36.4994			729.189	32.6081			857.171	11.3495	100		879.6	41.5282			858.271	23.0984	5.77831	100		862.58	4.32129			862.58	4.52272			862.58	22.5069			847.542
873.756	70.3759	100		874.307	42.5745			874.307	16.468							733.564	34.3227			730.602	27.6163			858.832	24.8982	0		881.304	26.9088			859.934	44.6629	20.9464	0		864.252	20.2221			864.252	4.84367			864.252	19.6697			849.186
875.446	61.2776			875.998	36.8854			875.998	9.27202							734.985	35.4735			732.014	32.816			860.493	27.5704			883.009	47.1765			861.597	31.0807	17.635			865.925	24.0855			865.925	4.93707			865.925	23.1386			850.83
877.136	59.6339			877.688	31.4161			877.688	34.3686							736.413	33.5826			733.427	33.8833			862.155	16.006			884.713	34.0725			863.26	12.9545	13.8507			867.595	9.63382			867.595	4.45766			867.595	8.46282			852.466
878.827	38.7279			879.379	27.51			879.379	52.0843							737.821	34.4433			734.84	27.8602			863.816	19.9925			886.417	7.31641			864.924	24.2163	2.40277			869.267	17.4926			869.267	5.6679			869.267	17.0556			854.109
880.516	35.3238			881.071	32.0559			881.071	17.4046							739.241	33.6939			736.254	34.8677			865.477	37.0097			888.123	25.469			866.588	17.8108	38.7207			870.938	14.3805			870.938	3.04453			870.938	13.9488			855.754
882.206	21.7326			882.762	34.1713			882.762	11.05							740.668	29.132			737.667	23.7385			867.138	72.1835			889.828	34.0375			868.25	21.5667	29.1273			872.61	0.46862			872.61	1.12123			872.61	14.1128			857.398
883.896	22.133			884.453	30.7151	0		884.453	9.66061							742.081	25.8352			739.08	36.8219			868.799	73.0304			891.532	42.9679			869.914	23.9681	7.68769			874.283	10.3918			874.283	2.84341			874.283	19.1311			859.042
885.586	26.1317			886.144	43.4641	100		886.144	6.74245							743.497	31.7888			740.494	31.5622			870.46	45.6072			893.237	17.8811			871.577	19.7912	4.93078			875.954	21.8676			875.954	3.53001			875.954	13.7263			860.678
887.277	25.394			887.834	47.1999			887.834	11.5657							744.917	32.0348			741.906	23.7294			872.122	20.288			894.94	38.6837			873.24	31.5573	5.58502			877.625	22.5437			877.625	6.20545			877.625	21.0063			862.322
888.967	19.5538			889.525	52.8255			889.525	7.6145							746.337	32.1268			743.319	35.6885			873.783	12.6647	100		896.646	52.3224			874.904	25.0555	24.636			879.297	14.7564			879.297	1.87485			879.297	22.7884			863.965
890.657	20.1702			891.217	44.3448			891.217	8.13152							747.753	32.7573			744.732	33.5683			875.444	10.1206	0		898.351	32.4032			876.568	29.1649	19.4579			880.968	18.3368			880.968	3.87232			880.968	20.4833			865.61
892.347	20.2013			892.908	39.9961			892.908	11.1705							749.172	35.3284			746.146	33.2649			877.105	8.93737			900	14.0979			878.23	14.4174	5.6715			882.64	18.5376			882.64	3.42882			882.64	16.223			867.254
894.037	19.3537			894.599	52.5058			894.599	10.7522							750.601	36.7134			747.559	25.7726			878.766	13.9733							879.893	22.9842	23.6168			884.313	19.3194			884.313	7.03281			884.313	25.0848			868.898
895.727	20.399			896.29	47.2461			896.29	9.08015							752.013	35.2191			748.972	33.382			880.428	9.06148							881.557	32.3427	10.0663			885.984	8.69003			885.984	4.9293			885.984	26.7272			870.534
897.418	12.3616			897.98	35.9156			897.98	5.73058							753.429	36.4128			750.386	35.6983			882.089	12.1123							883.22	34.7329	17.8487			887.655	11.4328			887.655	4.36256			887.655	14.2459			872.178
899.108	27.2972			900	40.2896			900	4.74983							754.849	35.6947			751.798	40.81			883.75	16.3021							884.884	28.5695	9.2745	100		889.327	2.27188			889.327	7.87462			889.327	22.5225			873.821
900	5.92532															756.269	29.6452			753.212	44.1802			885.411	17.2747							886.548	27.4393	23.1372	0		890.998	10.5084			890.998	7.92905			890.998	20.5298			875.466
																757.684	32.1636			754.625	27.6366			887.072	19.9472							888.21	38.7558	28.5271			892.671	17.2959			892.671	7.06317			892.671	27.8288			877.11
																759.105	31.7505			756.038	37.1472			888.733	21.3833							889.873	35.3647	11.8669			894.343	22.075			894.343	4.26583			894.343	21.0685			878.746
																760.532	34.0775			757.451	36.602			890.395	29.4344	100						891.537	19.5435	13.3694			896.014	16.8273			896.014	5.2489			896.014	28.6824			880.39
																761.945	35.1457			758.864	42.7335			892.056	25.7885	0						893.2	42.5747	0.70703			897.685	14.4777			897.685	4.38745			897.685	20.9753			882.034
																763.361	35.2406			760.278	39.4313			893.717	53.4576							894.864	30.2283	23.9288			900	5.96039			900	4.32193			900	33.8934			883.678
																764.793	37.2567			761.69	35.1765			895.378	92.1616							896.528	40.6892	35.8822															885.322
																766.2	34.1084			763.104	31.6652			897.039	58.4919							898.19	53.8815	26.9943															886.966
																767.621	36.4135			764.517	31.6255			898.7	41.675							900	81.469	26.9078															888.602
																769.036	37.8603			765.93	30.8223			900	40.7395																								890.246
																770.457	35.8947			767.343	30.5003																												891.89
																771.877	39.3249			768.756	34.5675																												893.534
																773.293	39.5929			770.17	33.7079																												895.178
																774.725	43.309			771.582	31.0178																												896.814
																776.133	37.5898			772.996	34.9456																												898.458
																777.552	42.9692			774.409	32.9794																												900
																778.969	42.3638			775.822	29.3638
																780.389	39.8307			777.235	34.1117
																781.809	39.1613			778.648	35.4546
																783.224	42.9649			780.062	36.2081
																784.657	32.7401			781.475	36.1547
																786.065	36.9033			782.888	47.0367
																787.484	38.9996			784.301	55.788
																788.913	39.9339			785.714	48.3834
																790.321	39.0517			787.127	52.0295
																791.741	36.5308			788.54	51.8552
																793.157	38.559			789.955	51.8118
																794.577	37.3446			791.367	47.1917
																795.997	33.1648			792.78	49.3157
																797.417	33.1036			794.193	43.3199
																798.845	36.6827			795.606	46.4863
																800.253	36.5483			797.019	45.808
																801.673	37.5106			798.433	48.8228
																803.088	31.6079			799.847	38.886
																804.508	35.1775			801.259	44.7088
																805.928	36.3431			802.672	35.4429
																807.349	38.8904			804.085	29.0701
																808.777	30.513			805.498	39.936
																810.185	29.6901			806.911	43.7894
																811.605	25.9915			808.325	41.8889
																813.025	30.8774			809.739	54.7102
																814.441	29.7726			811.151	55.8158
																815.86	24.9774			812.564	50.0113
																817.28	29.5454			813.977	47.5085
																818.701	33.8398			815.39	56.8535
																820.116	27.2921			816.804	63.1329
																821.536	26.2783			818.217	52.0743
																822.965	19.6385			819.631	48.6144
																824.372	24.8857			821.043	52.7804
																825.792	26.9786			822.456	47.3701
																827.212	22.4336			823.869	53.0077
																828.632	26.2819			825.282	54.2846
																830.048	26.642			826.696	57.8351
																831.468	22.8007			828.109	76.3309
																832.896	21.7647			829.523	71.6868
																834.309	24.1438			830.935	72.8055
																835.725	25.4818			832.348	80.9112
																837.144	25.7283			833.761	78.9848
																838.565	17.6757			835.175	77.8917
																839.984	17.0352			836.588	75.4225
																841.4	23.0939			838.001	69.4755
																842.821	21.5451			839.415	67.6948
																844.24	18.8807			840.827	67.0554
																845.656	11.5426			842.24	59.8834
																847.084	13.8179			843.653	60.7621
																848.497	15.9098			845.067	49.9462
																849.917	13.9543			846.48	58.8449
																851.332	13.41			847.893	58.9033
																852.752	17.7314			849.307	58.1283
																854.173	16.8005			850.72	51.8505
																855.589	13.7299			852.132	48.6618
																857.021	9.9887			853.546	59.9926
																858.428	13.0385			854.959	55.0278
																859.848	11.0985			856.372	54.1482
																861.265	6.31266			857.785	54.951
																862.684	14.4093			859.199	45.2069
																864.105	13.8279			860.612	39.0366
																865.521	9.99745			862.024	38.315
																866.953	6.82568			863.438	34.693
																868.36	1.24819			864.851	33.7847
																869.78	6.87167			866.264	34.4071
																871.209	9.22889			867.677	29.5981
																872.617	5.1667			869.091	26.5899
																874.036	6.37547			870.504	34.4329
																875.453	1.46176			871.917	37.5182
																876.873	4.91422			873.33	33.368
																878.292	2.99804			874.743	30.9689
																879.712	7.22434			876.156	32.3415
																881.141	0			877.569	33.1331
																882.549	3.90013			878.983	37.1071
																883.968	4.68661			880.397	37.4125
																885.389	11.9029			881.809	35.3257
																886.805	5.44419			883.222	30.1066
																888.225	11.5102			884.635	33.4267
																889.645	5.86133			886.048	30.2585
																891.073	3.97823			887.461	30.2763
																892.481	5.65415			888.875	32.2325
																893.901	10.0544			890.289	28.2345
																895.329	0.54244			891.701	38.0138
																896.737	12.0345			893.114	34.4771
																898.157	14.8043			894.527	45.0223
																900	8.21133			895.94	43.1767
																				897.353	37.3873
																				898.767	41.8964
																				900	45.1713
[truncated: 8 more columns]

## Sheet: SHH Flux graphs
																							SHH-deposit event
																							R-GECO signal intenity
