# Supplementary material for: Cytoneme delivery of Sonic Hedgehog from ligand-producing cells requires Myosin 10 and a Dispatched-BOC/CDON co-receptor complex
Source: eLife. 2021 Feb 11;10:e61432. doi: 10.7554/eLife.61432 (PMC7968926; doi:10.7554/eLife.61432)
Supplement: Figure 2—source data 2. [file elife-61432-fig2-data2.xlsx]

## Sheet: Sheet1
Flux per minute values
GFP	SHH-GFP	GFP Mixed	SHH-GFP Mixed	GFP Smo-/-	SHH-GFP Smo-/-	GFP with Cyclopamine	Shh-GFP with Cyclopamine
0.266667	0.733333	0.066667	0.6	0.2	0.4	0.266667	0.333333
0.133333	0.6	0.333333	0.533333	0.533333	0.266667	0.333333	0.2
0.333333	0.533333	0.333333	0.6	0.2	0.133333	0.2	0.133333
0.133333	0.533333	0.066667	0.733333	0.133333	0.066667	0.0666667	0.333333
0.466667	0.466667	0.133333	0.466667	0.466667	0.266667	0.2	0.6
0.266667	0.466667	0.333333	0.533333	0.133333	0.2	0.133333	0.466667
0.0666667	0.8	0.266667	0.066667	0.333333	0.133333	0.066667	0.266667
0.2	0.466667	0.066667	0.733333	0.533333	0.2	0.2	0.2
0.266667	0.666667	0.4	0.466667	0.2	0.466667	0.2	0.466667
0.2	0.733333	0.133333	0.533333	0.333333	0.266667	0.333333	0.533333
0.2	0.466667	0.066667	0.933333	0.266667	0.333333	0.133333	0.266667
0.2	0.8	0.2	0.6	0.4	0.266667	0.2	0.533333
0.333333	0.466667	0.266667	0.466667	0.066667	0.2	0.066667	0.466667
0.0666667	0.4	0.533333	0.466667	0.266667	0.133333	0.2	0.333333
0.133333	0.733333	0.2	0.466667	0.2	0.2	0.6	0.2
0.133333	0.533333	0.466667	0.6	0.2	0.2	0.266667	0.0666667
0.133333	0.6	0.066667	0.466667	0.266667	0.2		0.533333
0.266667	0.266667	0.466667	0.4	0.066667	0.133333		0.333333
0.0666667	0.6	0.4	0.733333	0.4	0.133333		0.0666667
0.266667	0.733333	0.266667	0.533333	0.066667	0.2		0.4
0.133333	0.533333	0.466667	0.266667	0.266667	0.266667		0.2
0.2	0.733333		0.533333	0.133333	0.333333		0.133333
0.0666667	0.266667		0.666667	0.066667	0.066667		0.4
0.0666667	0.4		0.466667	0.333333	0.133333		0.266667
0.133333	0.6		0.6	0.333333	0.266667		0.133333
0.2	0.866667				0.133333		0.266667
0.266667	0.4				0.266667		0.2
0.133333	0.066667				0.2		0.266667
0.133333	1.13333				0.333333		0.133333
0.4	0.666667				0.466667		0.266667
0.2	0.133333				0.133333		0.0666667
0.333333	1				0.666667
0.333333	0.533333				0.2
0.733333	0.533333				0.133333
0.133333	0.866667				0.4
0.2	0.4				0.133333
0.2	0.466667				0.466667
0.333333	0.2				0.266667
0.4	0.666667				0.133333
0.266667	0.533333				0.133333
0.2	0.866667				0.266667
0.333333	0.6				0.133333
0.2	0.4				0.066667
0.0666667	0.733333				0.133333
0.266667	0.4
0.2	0.533333
0.066667	0.6
0.133333	0.333333
0.133333	0.6
0.333333	0.666667
0.133333	0.733333
0.333333	0.4
0.2	0.6
0.066667	0.266667
0.133333	0.4
0.2	0.533333
0.333333	0.4
0.133333	0.466667
0.333333	0.666667
0.066667	0.4
0.4	0.066667
	0.266667
	0.4
	0.466667
	0.466667
	0.333333
	0.6
	0.066667
	0.333333
	0.466667
	0.4
	0.533333
	0.533333
	0.533333
	0.4
	0.133333
	0.6
	0.8
	0.666667
	0.4
	0.2
